# Supplementary material for: A New Approach to Assess Quality of Motion in Functional Task of Upper Limb in Duchenne Muscular Dystrophy
Source: MDPI journal article supplement (doi:10.3390/app122312247), 2022-11-30
Supplement: s1 [file s1]

# A new approach to assess quality of motion in functional task of upper limb in Duchenne muscular dystrophy

Wiktoria Wojnicz <sup>1</sup>, Agnieszka Sobierajska-Rek <sup>2</sup>, Bartłomiej Zagrodny <sup>3</sup>, Michał Ludwicki <sup>3,\*</sup>,  
Joanna Jabłońska-Brudło <sup>2</sup> and Katarzyna Forysiak <sup>1</sup>

<sup>1</sup> Faculty of Mechanical Engineering and Ship Technology, Gdansk University of Technology,  
80-233 Gdansk, Poland

<sup>2</sup> Department of Rehabilitation Medicine, Faculty of Health Sciences with Institute of Maritime and Tropical  
Medicine, Medical University of Gdansk, 80-210 Gdansk, Poland

<sup>3</sup> Department of Automation, Biomechanics and Mechatronics, Faculty of Mechanical Engineering, Łódź  
University of Technology, 90-537 Łódź, Poland

\* Correspondence: [michal.ludwicki@p.lodz.pl](mailto:michal.ludwicki@p.lodz.pl)

## Supplement S1 – motion protocol to ADL functional motion test

Motion performance were assessing by using following ADL functional tasks:

- 1) abduction-adduction motion in the frontal plane;
- 2) lifting a 50/200/500/1000g weight from the waist height to the shoulder height;
- 3) lifting a 50/200/500/1000g weight from the waist height above the head;
- 4) moving 100/200/500/1000g weight on the table (on the waist height);
- 5) raising an arm with a 50/200g weight from the waist height to the mouth;
- 6) moving, lifting and stacking light/heavy cans on the waist height;
- 7) tracing a path on the waist height;
- 8) supination/pronation of the forearm;
- 9) picking up 6 coins;
- 10) performing a giving grip on the height of the head/chest;
- 11) transferring a given weight from the initial position to the given position;
- 12) raising the arm to the eyes height and tip of the head;
- 13) bringing food/cup to the mouth;
- 14) placing fingers on the diagram and pressing.

## Supplement S2 – (Figure S1 – Figure S4)

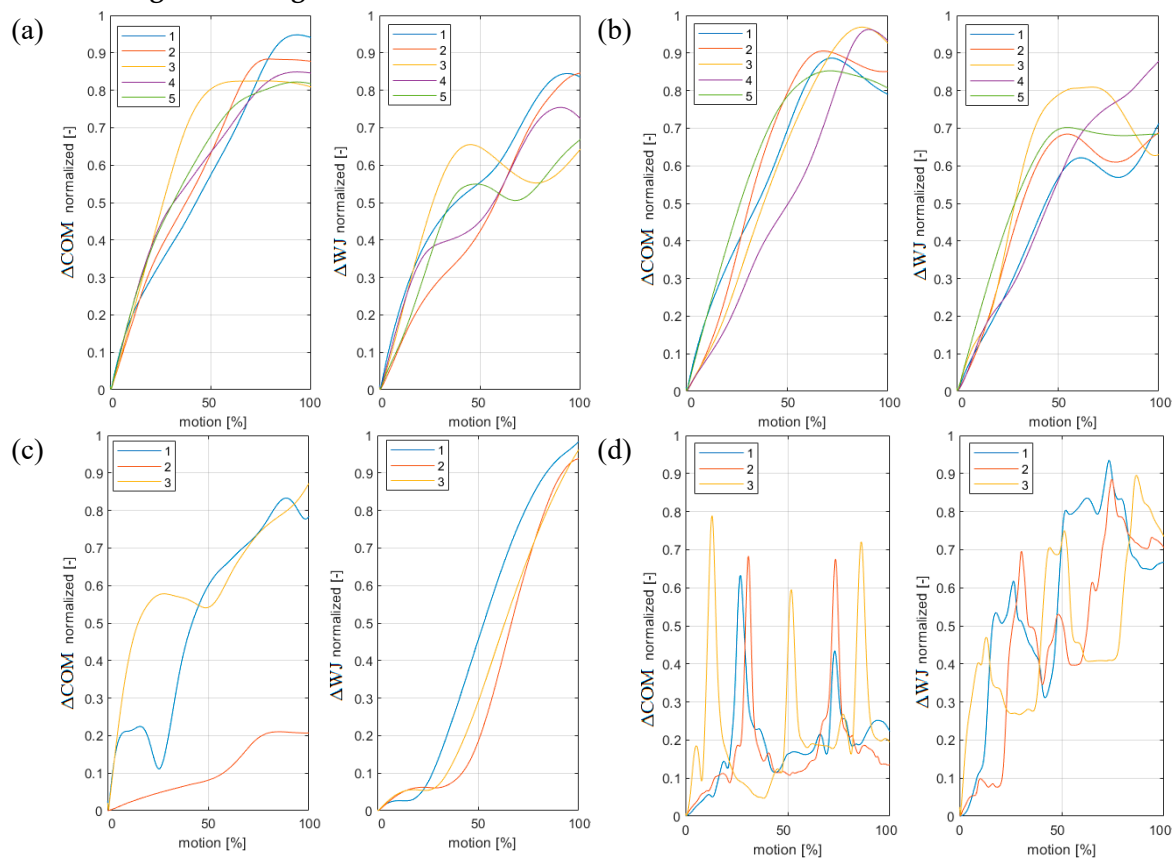

**Figure S1.** (a) Reference subject in motion 2 in natural conditions; (b) Reference subject in motion 2 in passive manipulator conditions; (c) DMD subject in motion 2 in natural conditions; (d) DMD subject in motion 2 in passive manipulator conditions.

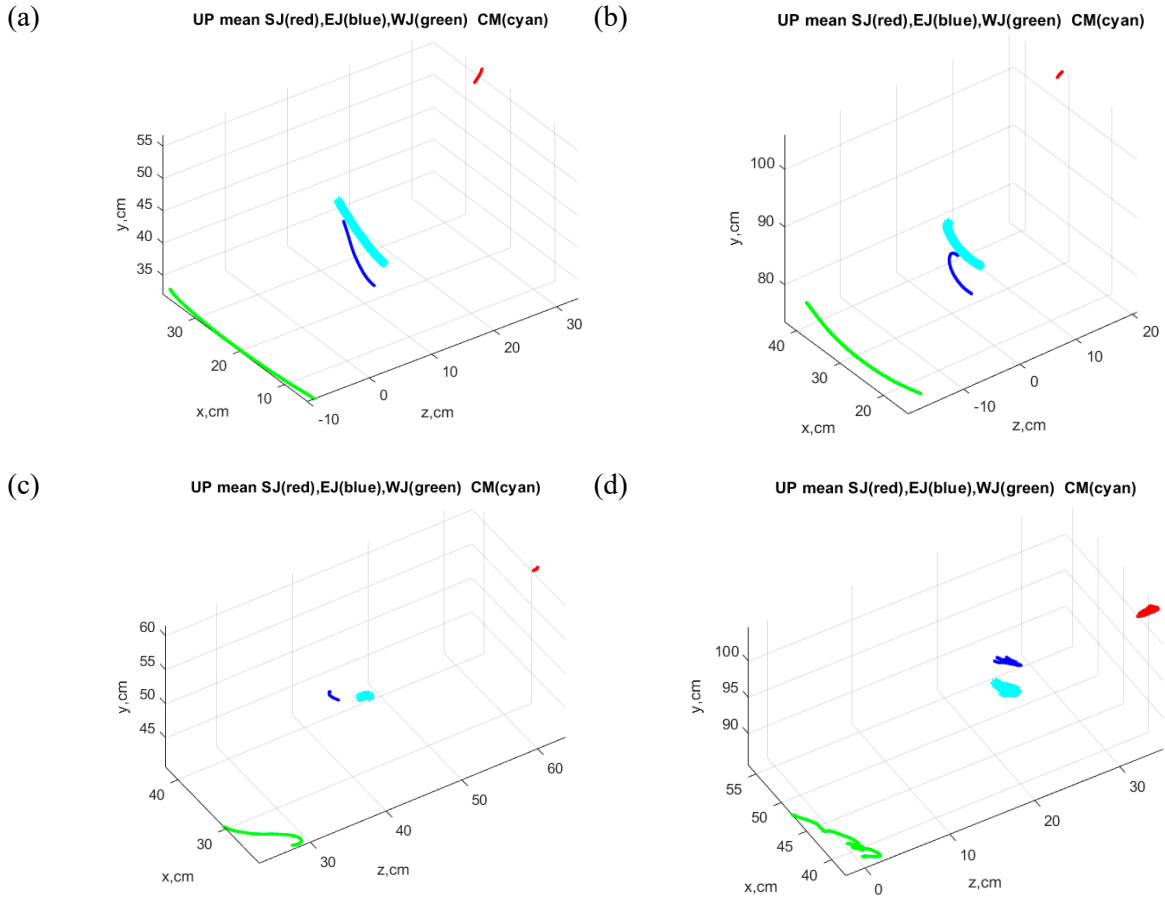

**Figure S2.** Mean trajectories of Shoulder joint (red), Elbow joint (blue), Wrist joint (green), COM of the upper limb (cyan): (a) Reference subject in motion 1 in natural conditions; (b) Reference subject in motion 1 in passive manipulator conditions; (c) DMD subject in motion 1 in natural conditions; (d) DMD subject in motion 1 in passive manipulator conditions.

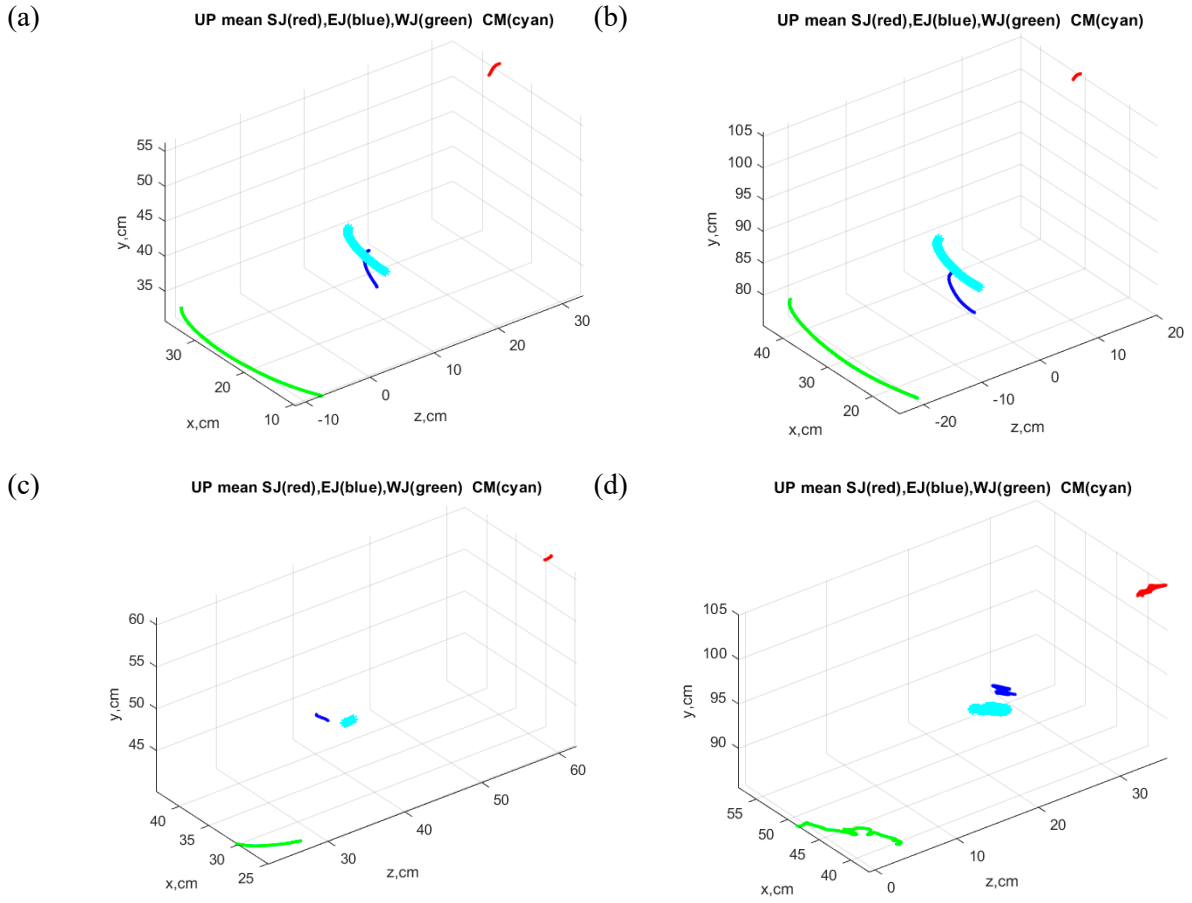

**Figure S3.** Mean trajectories of Shoulder joint (red), Elbow joint (blue), Wrist joint (green), COM of the upper limb (cyan): (a) Reference subject in motion 2 in natural conditions; (b) Reference subject in motion 2 in passive manipulator conditions; (c) DMD subject in motion 2 in natural conditions; (d) DMD subject in motion 2 in passive manipulator conditions.



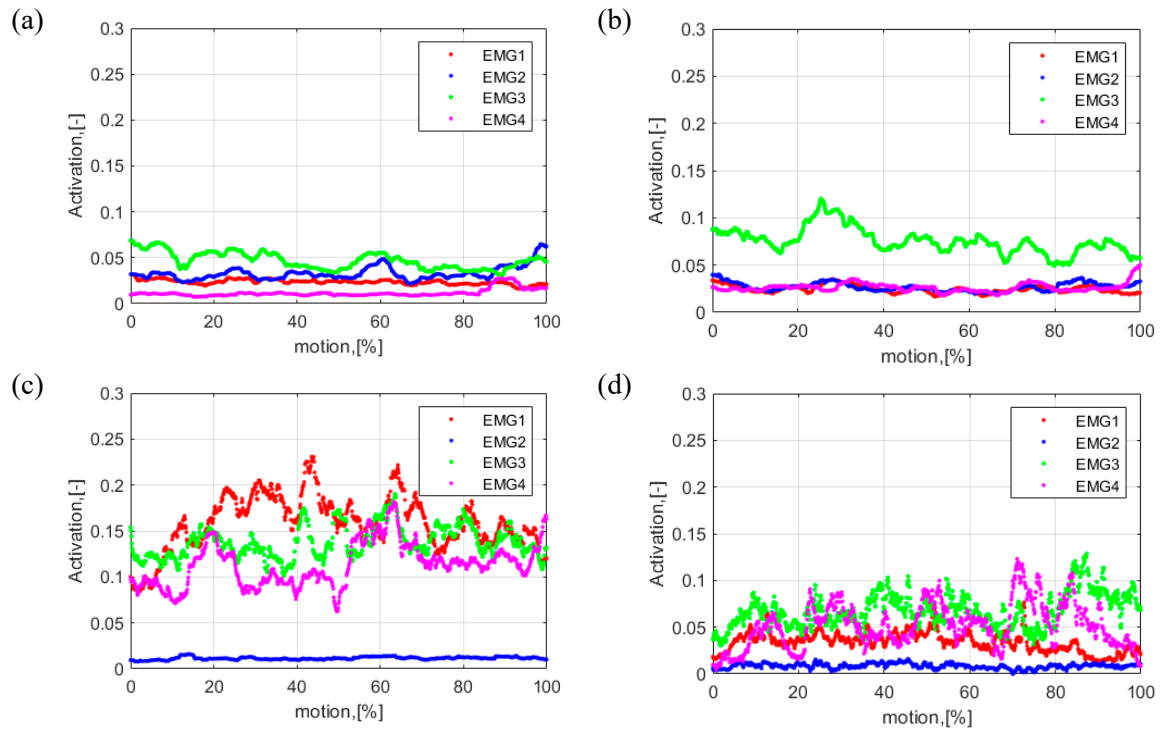

**Figure S4.** EMG data processed (mean value of the RMS normalized data): BB (EMG<sub>1</sub>), TB (EMG<sub>2</sub>), AD (EMG<sub>3</sub>) and UT (EMG<sub>4</sub>): (a) Reference subject in motion2 in natural conditions; (b) Reference subject in motion2 in passive manipulator conditions; (c) DMD subject in motion2 in natural conditions; (d) DMD subject in motion2 in passive manipulator conditions.

Supplement S3 – (Figure S5 – Figure S66)

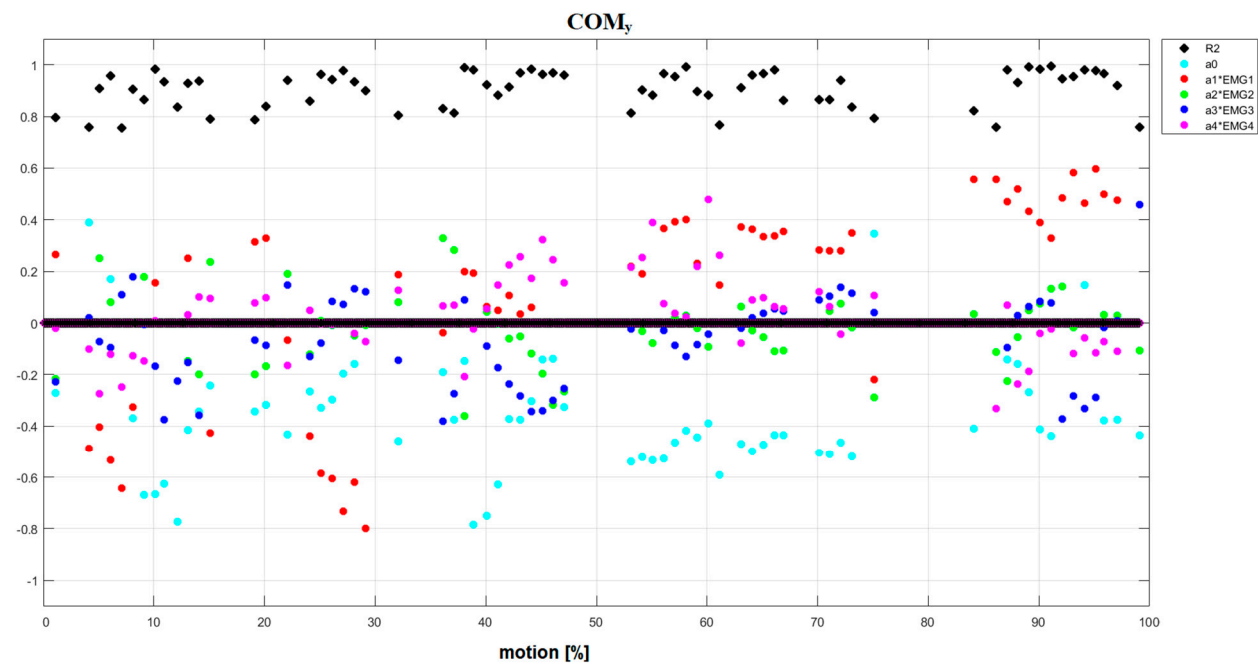

**Figure S5.** Results of linear piecewise multi-regression analysis performed in each tested fragment of the motion for reference subject in Motion 1. Natural conditions. COM<sub>y</sub>.

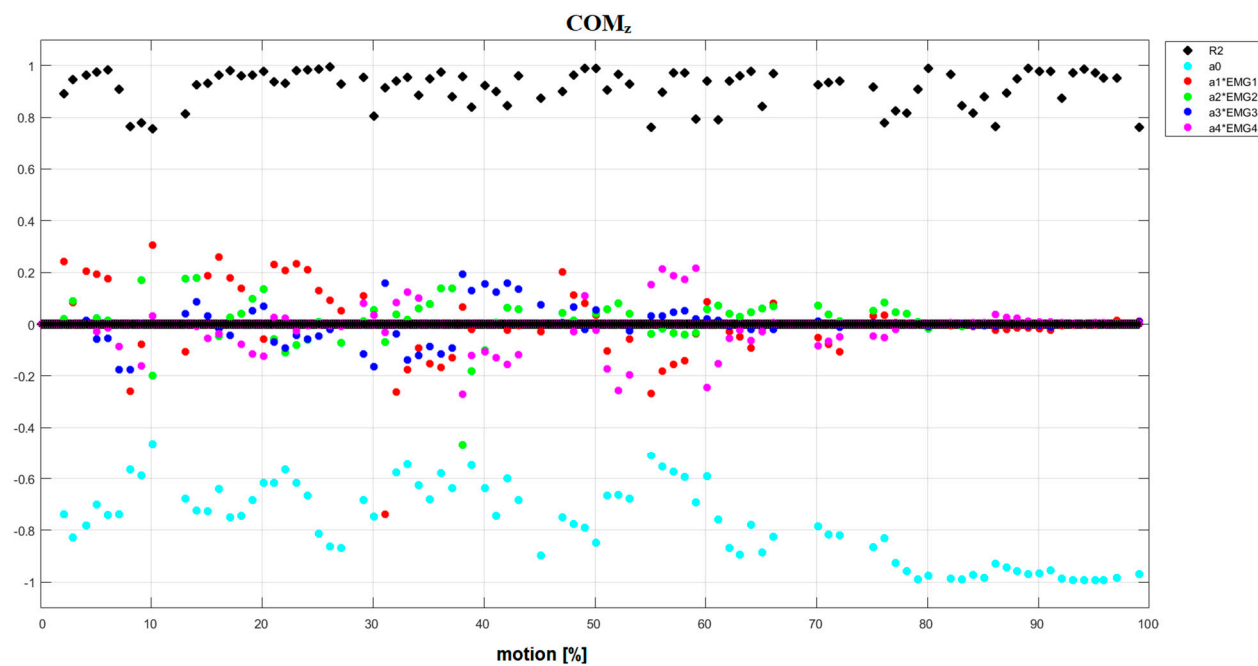

**Figure S6.** Results of linear piecewise multi-regression analysis performed in each tested fragment of the motion for reference subject Motion 1. Natural conditions. COM<sub>z</sub>.

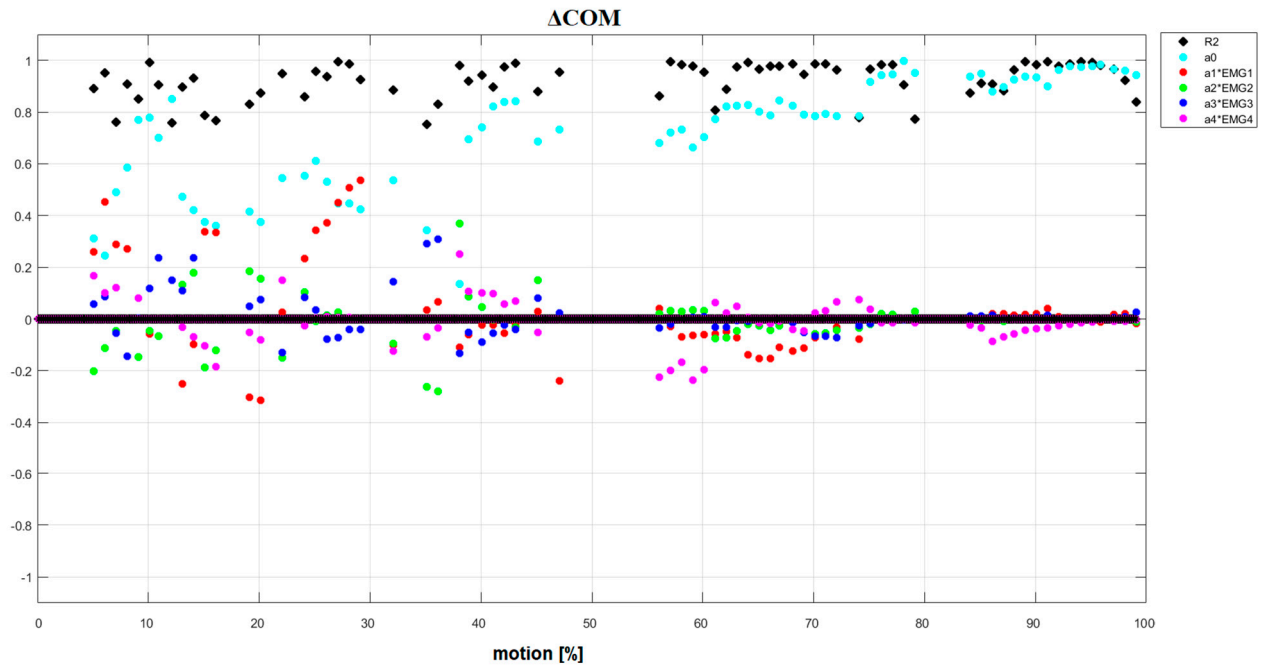

**Figure S7.** Results of linear piecewise multi-regression analysis performed in each tested fragment of the motion for reference subject in Motion 1. Natural conditions.  $\Delta COM$ .

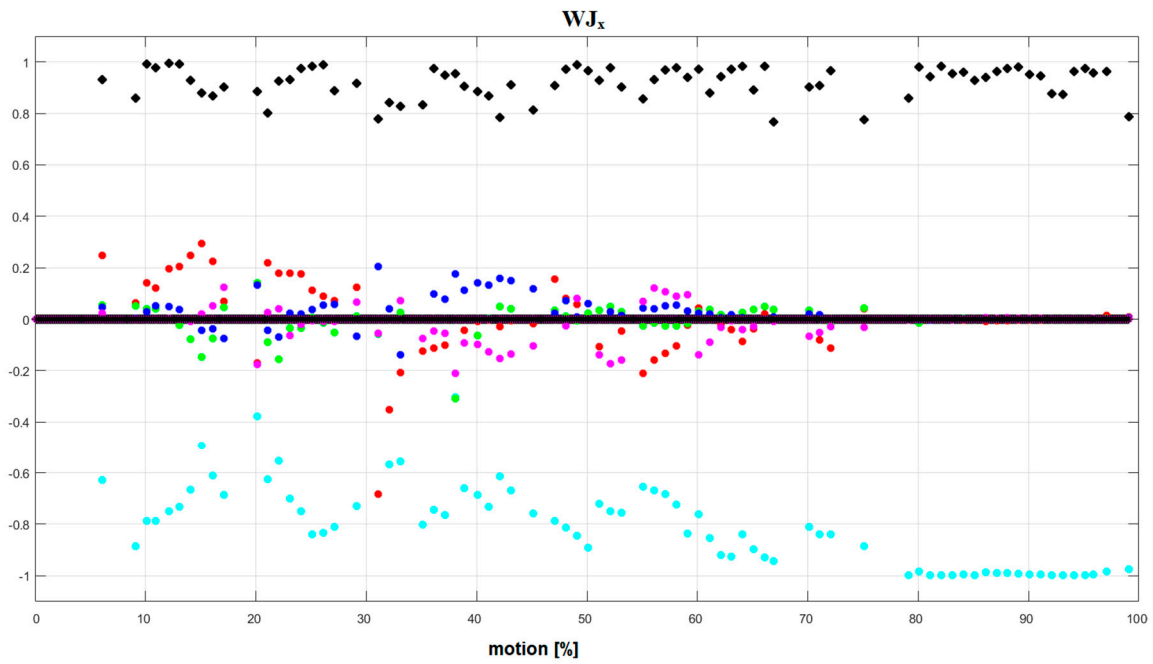

**Figure S8.** Results of linear piecewise multi-regression analysis performed in each tested fragment of the motion for reference subject in Motion 1. Natural conditions.  $WJ_x$ .

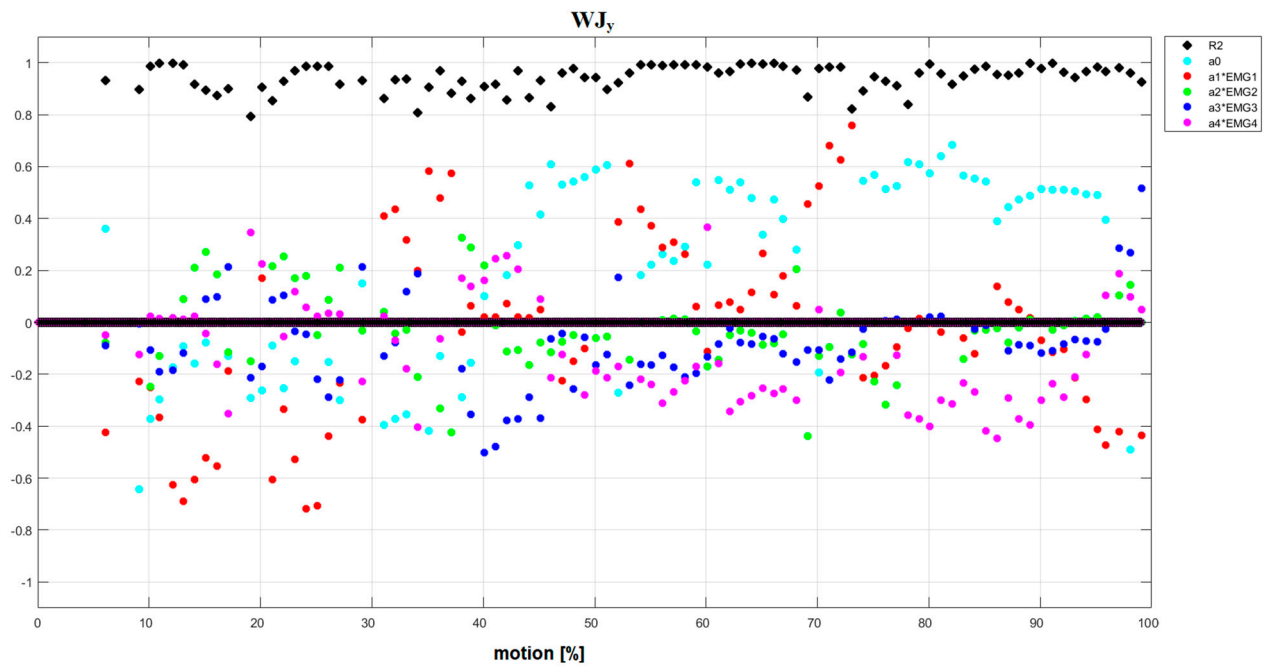

**Figure S9.** Results of linear piecewise multi-regression analysis performed in each tested fragment of the motion for reference subject in Motion 1. Natural conditions.  $WJ_y$ .

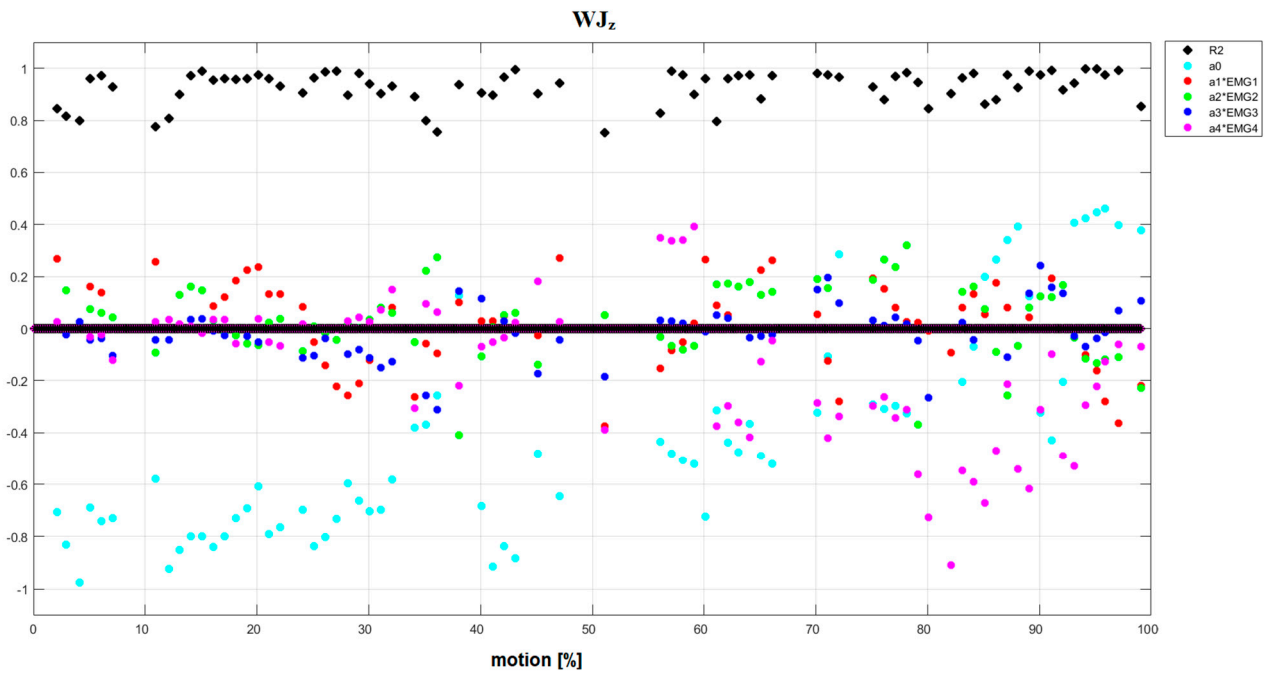

**Figure S10.** Results of linear piecewise multi-regression analysis performed in each tested fragment of the motion for reference subject in Motion 1. Natural conditions.  $WJ_z$ .

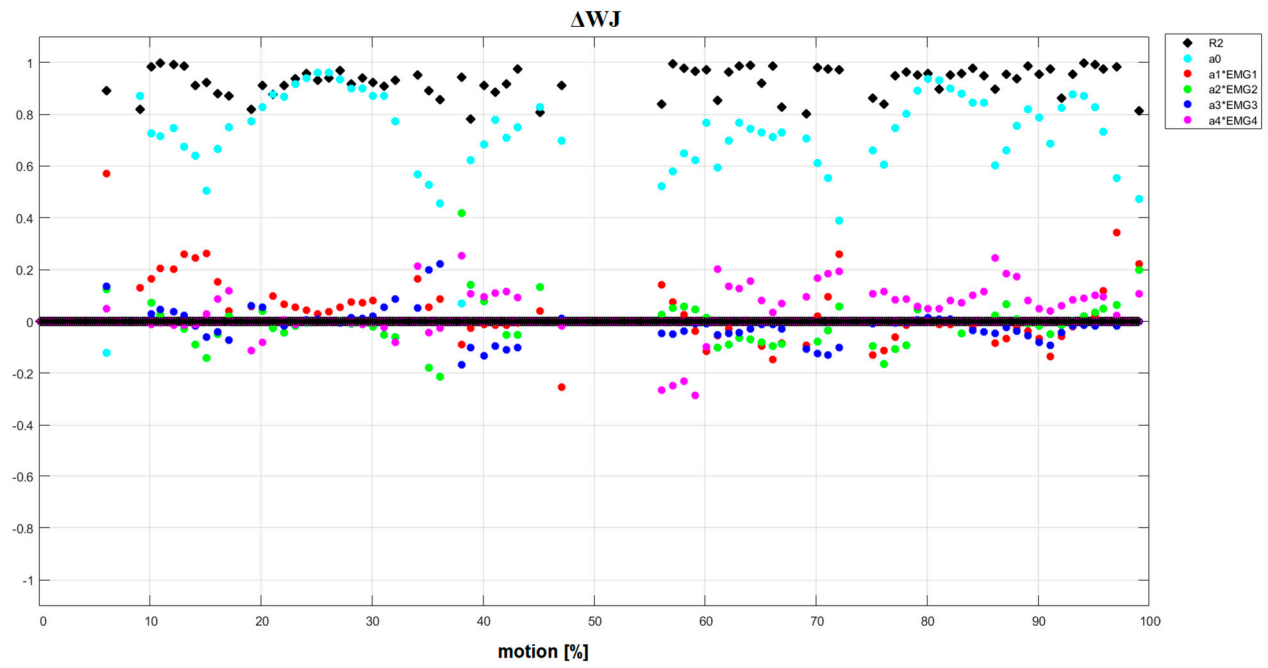

**Figure S11.** Results of linear piecewise multi-regression analysis performed in each tested fragment of the motion for reference subject in Motion 1. Natural conditions.  $\Delta W$ .

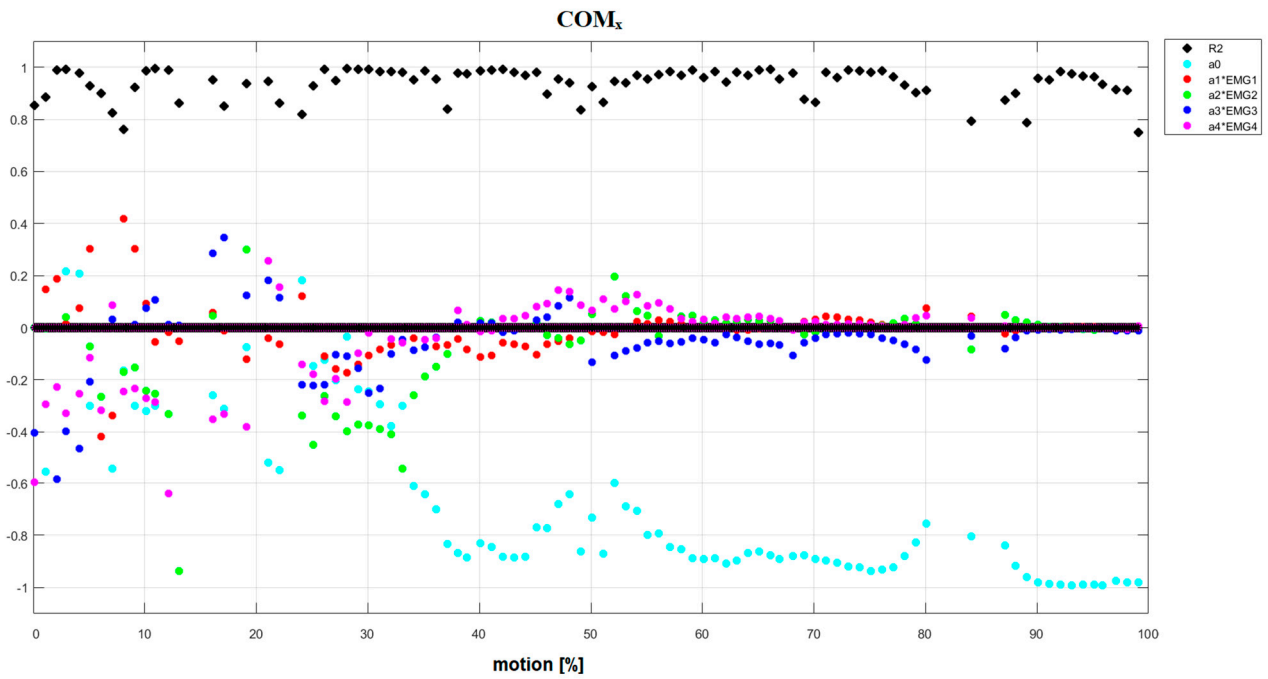

**Figure S12.** Results of linear piecewise multi-regression analysis performed in each tested fragment of the motion for reference subject in Motion 1. Passive manipulator conditions.  $COM_x$ .

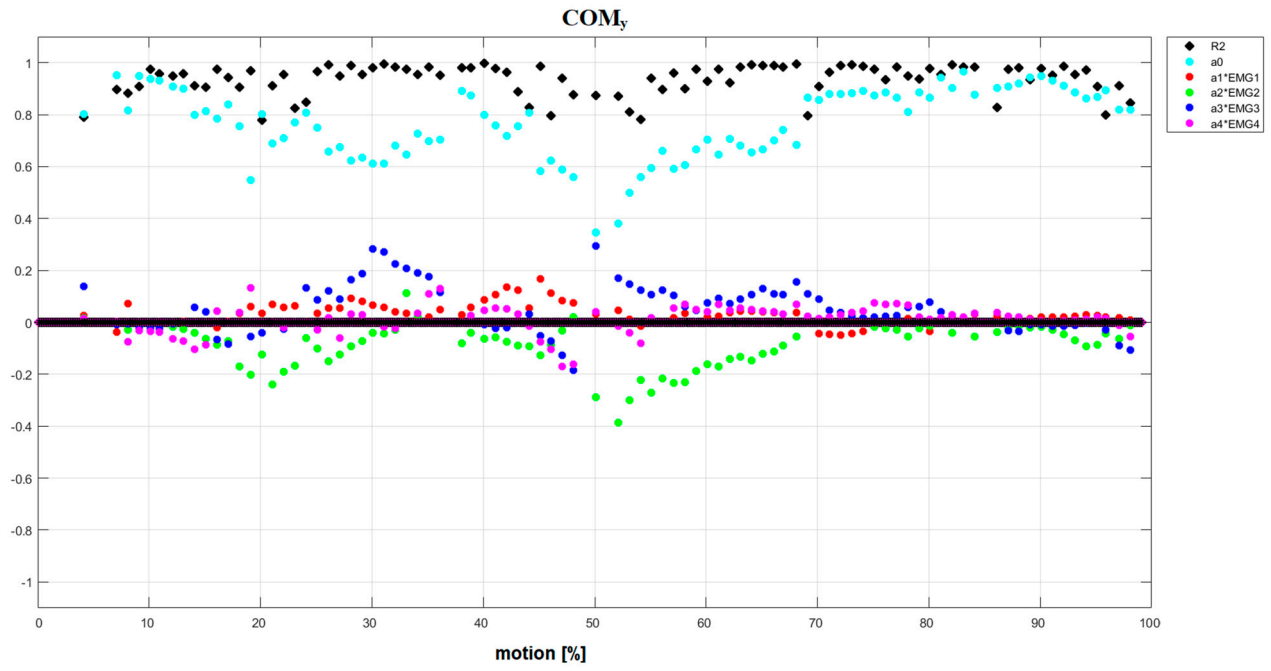

**Figure S13.** Results of linear piecewise multi-regression analysis performed in each tested fragment of the motion for reference subject in Motion 1. Passive manipulator conditions.  $COM_y$ .

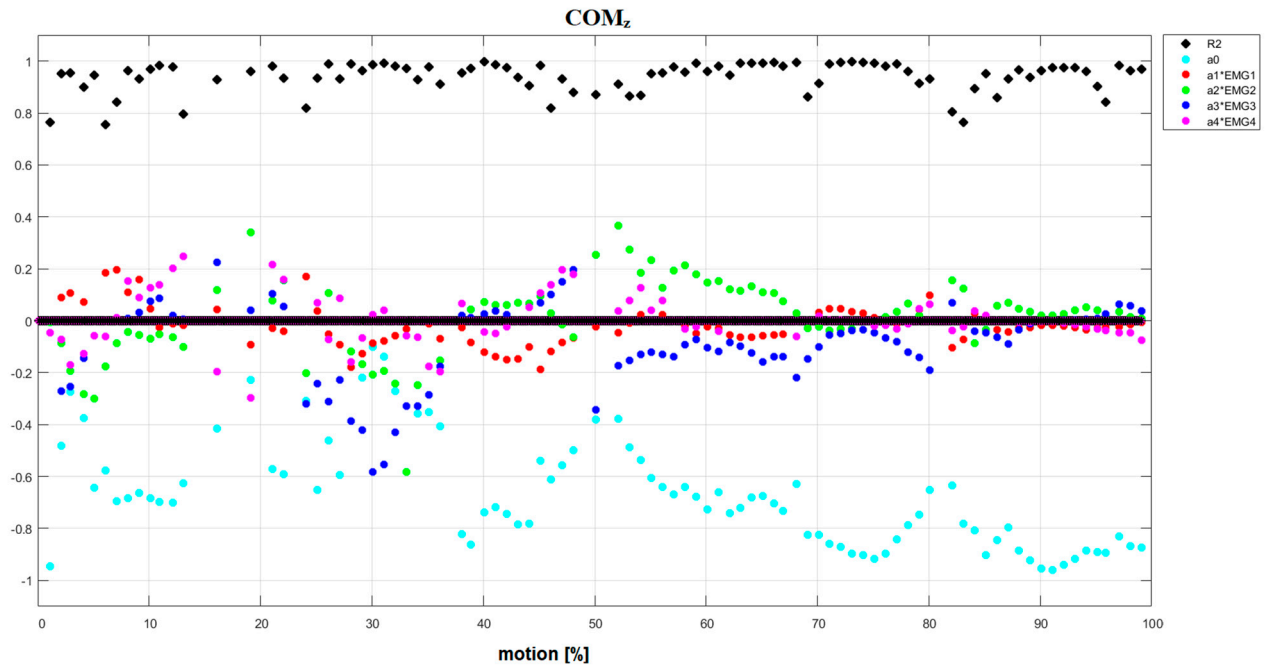

**Figure S14.** Results of linear piecewise multi-regression analysis performed in each tested fragment of the motion for reference subject in Motion 1. Passive manipulator conditions.  $COM_z$ .

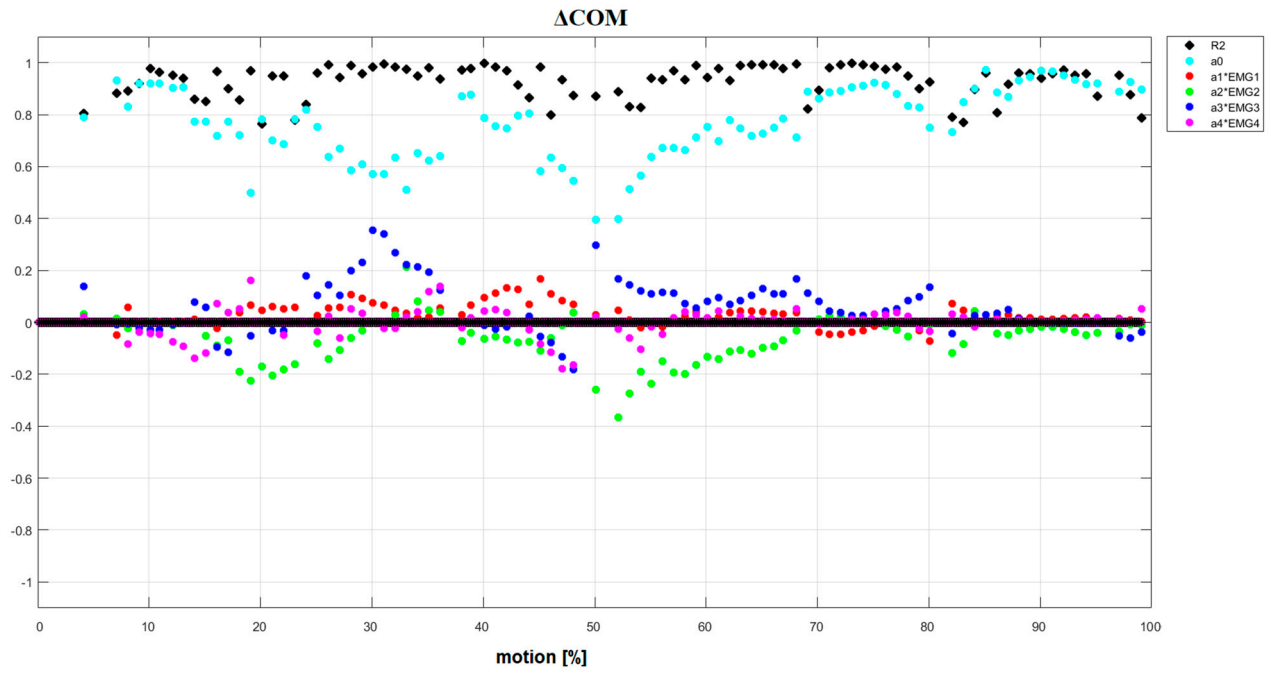

**Figure S15.** Results of linear piecewise multi-regression analysis performed in each tested fragment of the motion for reference subject in Motion 1. Passive manipulator conditions.  $\Delta COM$ .

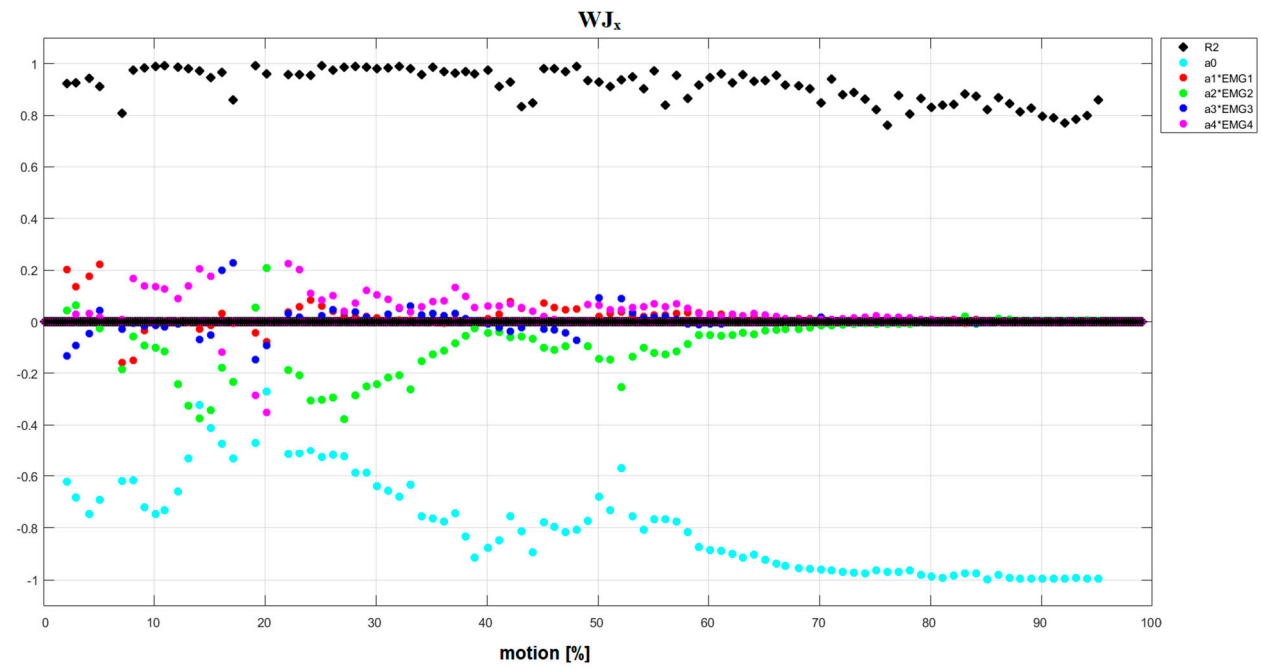

**Figure S16.** Results of linear piecewise multi-regression analysis performed in each tested fragment of the motion for reference subject in Motion 1. Passive manipulator conditions.  $WJ_x$ .

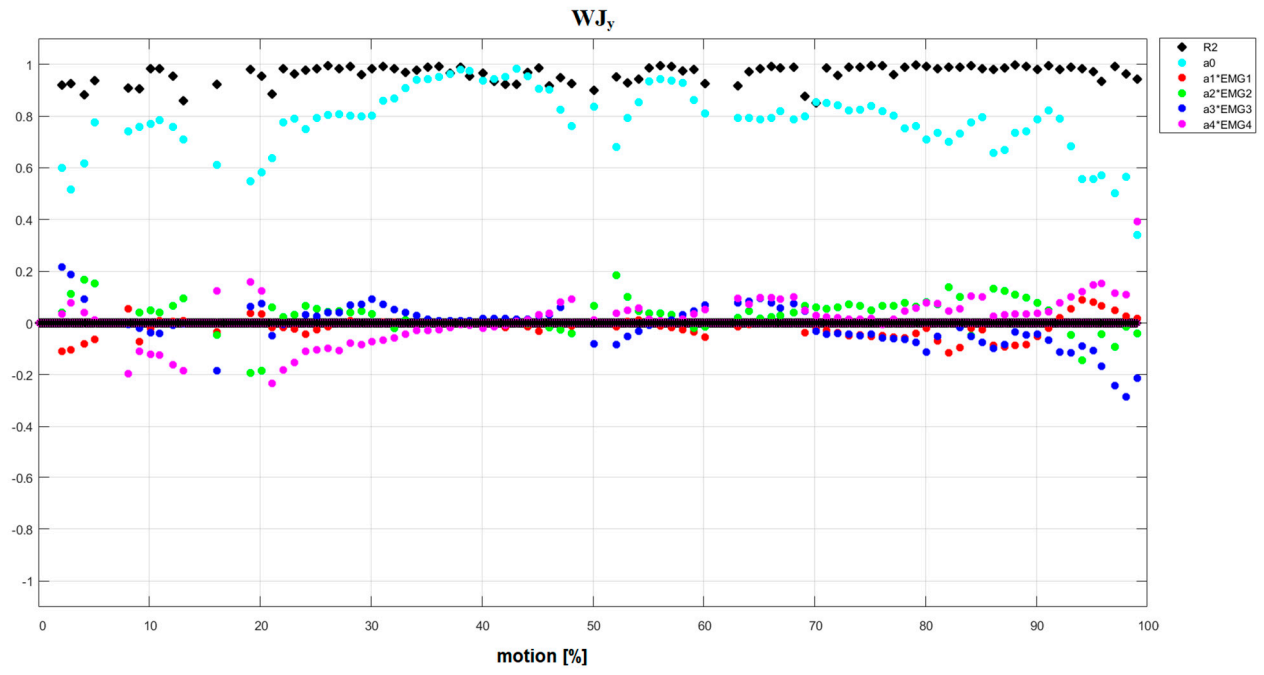

**Figure S17.** Results of linear piecewise multi-regression analysis performed in each tested fragment of the motion for reference subject in Motion 1. Passive manipulator conditions.  $WJ_y$ .

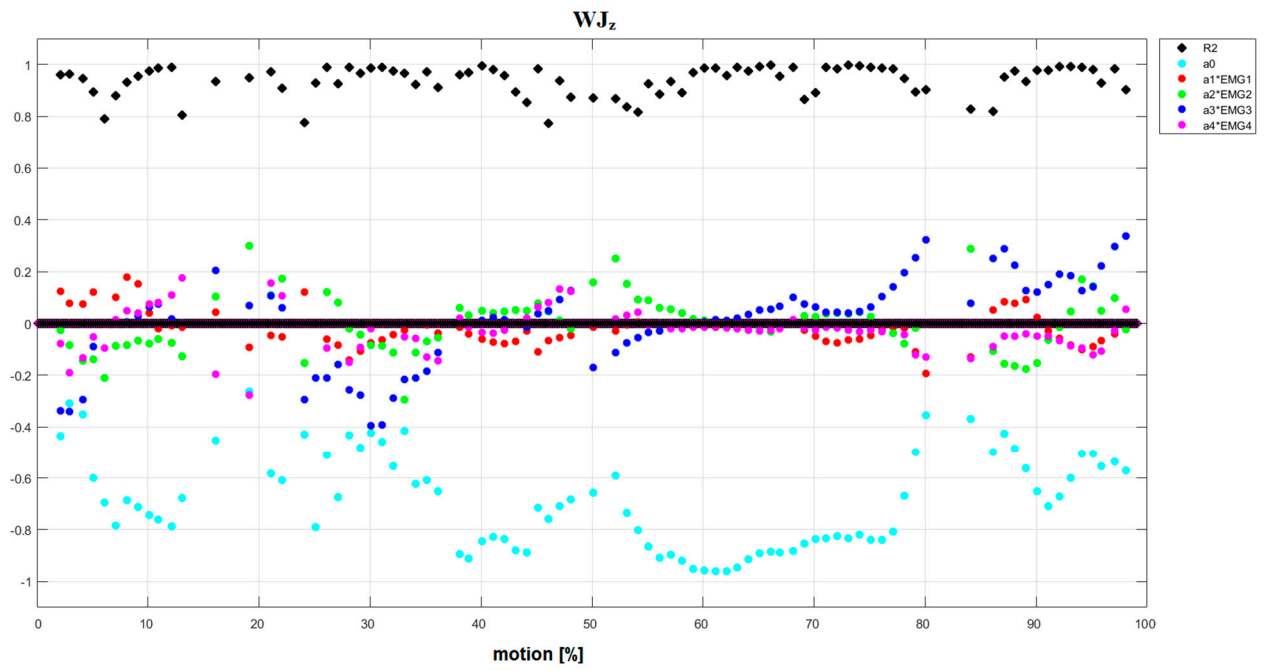

**Figure S18.** Results of linear piecewise multi-regression analysis performed in each tested fragment of the motion for reference subject in Motion 1. Passive manipulator conditions.  $WJ_z$ .



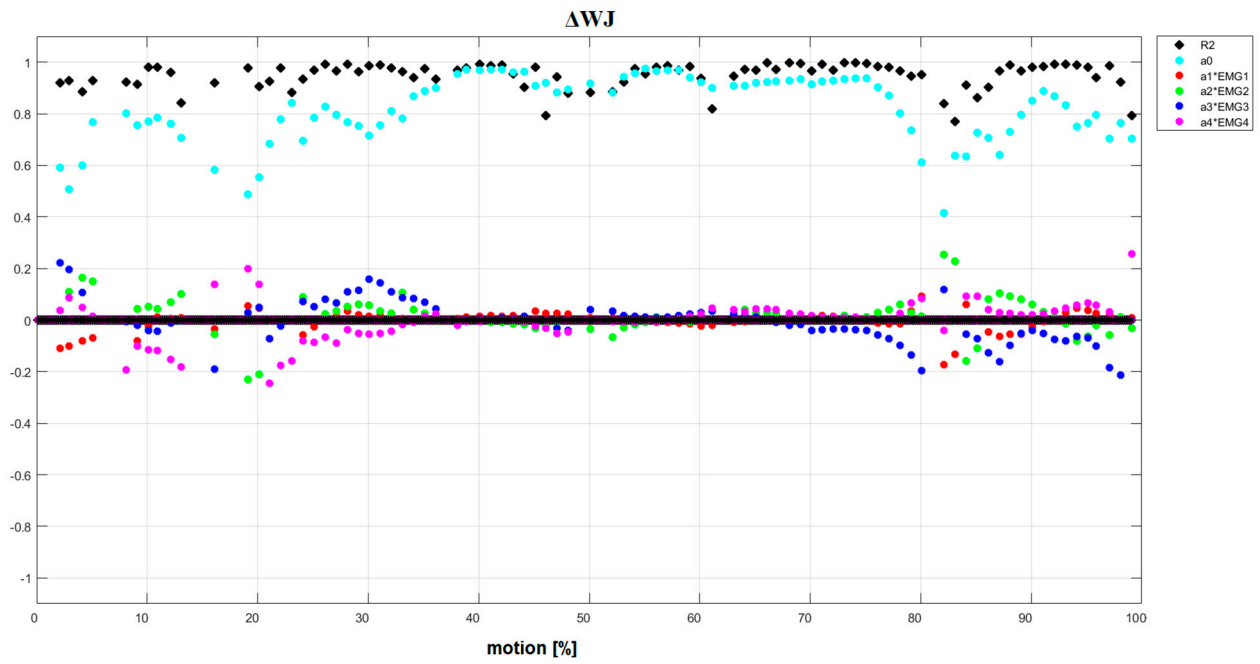

**Figure S19.** Results of linear piecewise multi-regression analysis performed in each tested fragment of the motion for reference subject in Motion 1. Passive manipulator conditions.  $\Delta W$ .

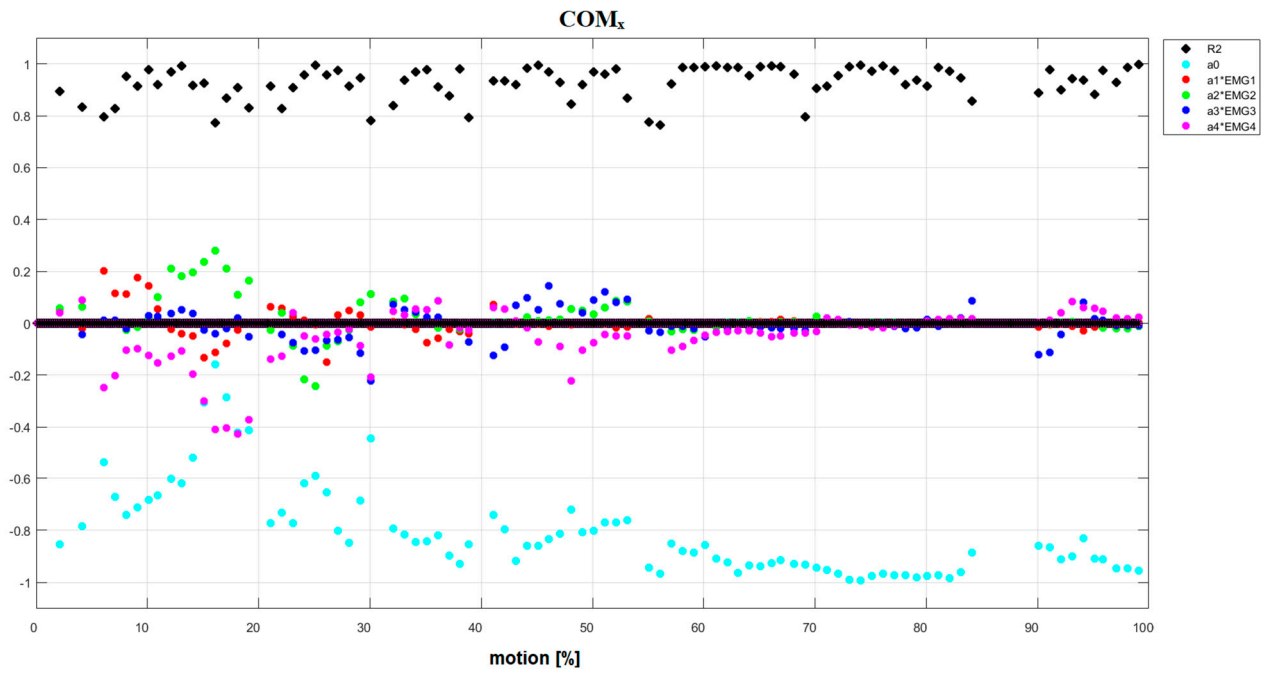

**Figure S20.** Results of linear piecewise multi-regression analysis performed in each tested fragment of the motion for reference subject in Motion 2. Natural conditions.  $\text{COM}_x$ .

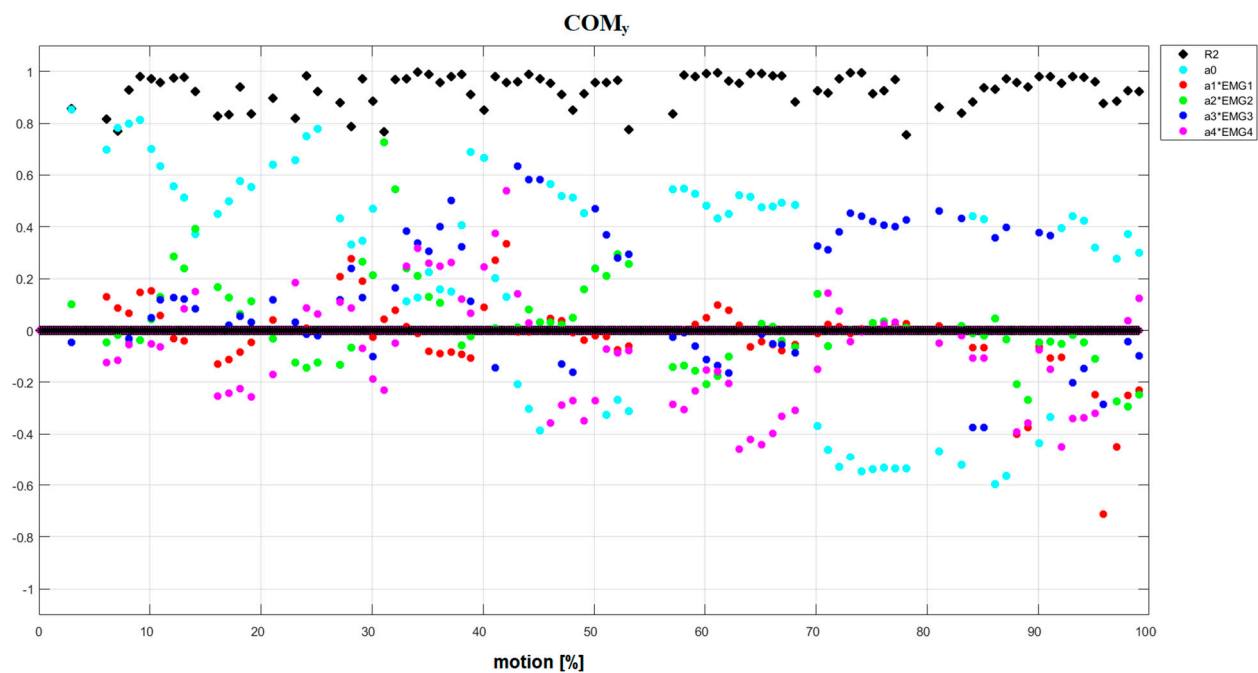

**Figure S21.** Results of linear piecewise multi-regression analysis performed in each tested fragment of the motion for reference subject in Motion 2. Natural conditions.  $COM_y$ .

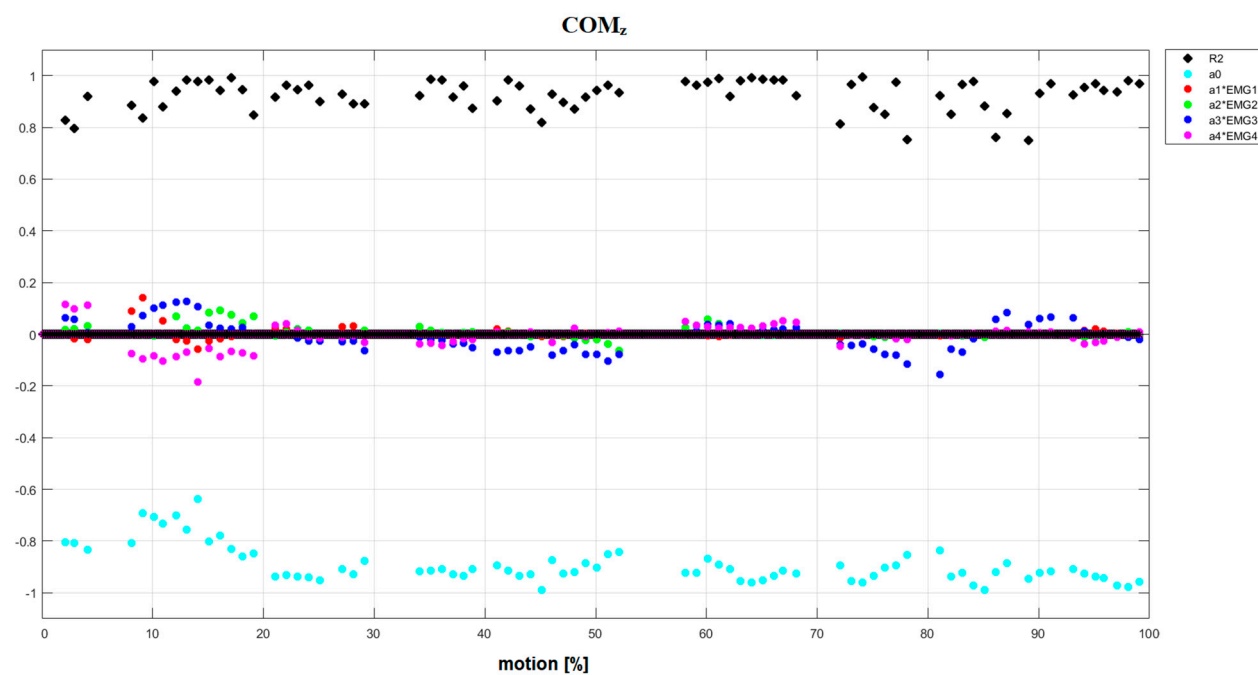

**Figure S22.** Results of linear piecewise multi-regression analysis performed in each tested fragment of the motion for reference subject in Motion 2. Natural conditions.  $COM_z$ .

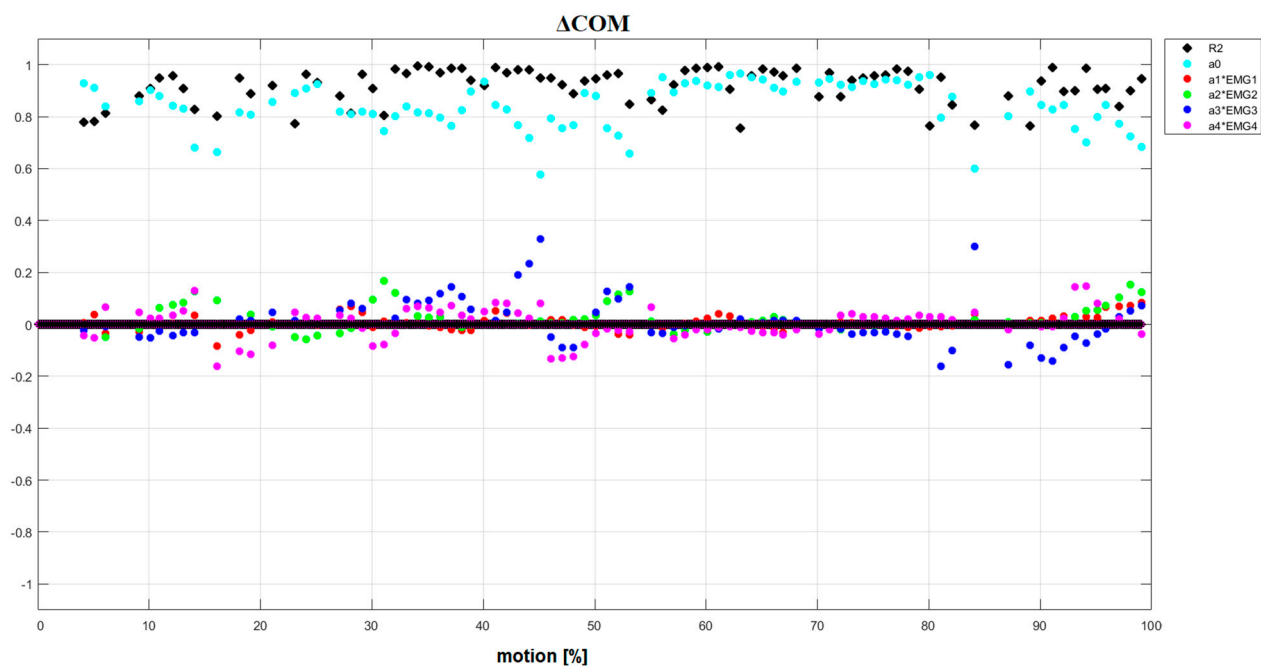

**Figure S23.** Results of linear piecewise multi-regression analysis performed in each tested fragment of the motion for reference subject in Motion 2. Natural conditions.  $\Delta COM$ .

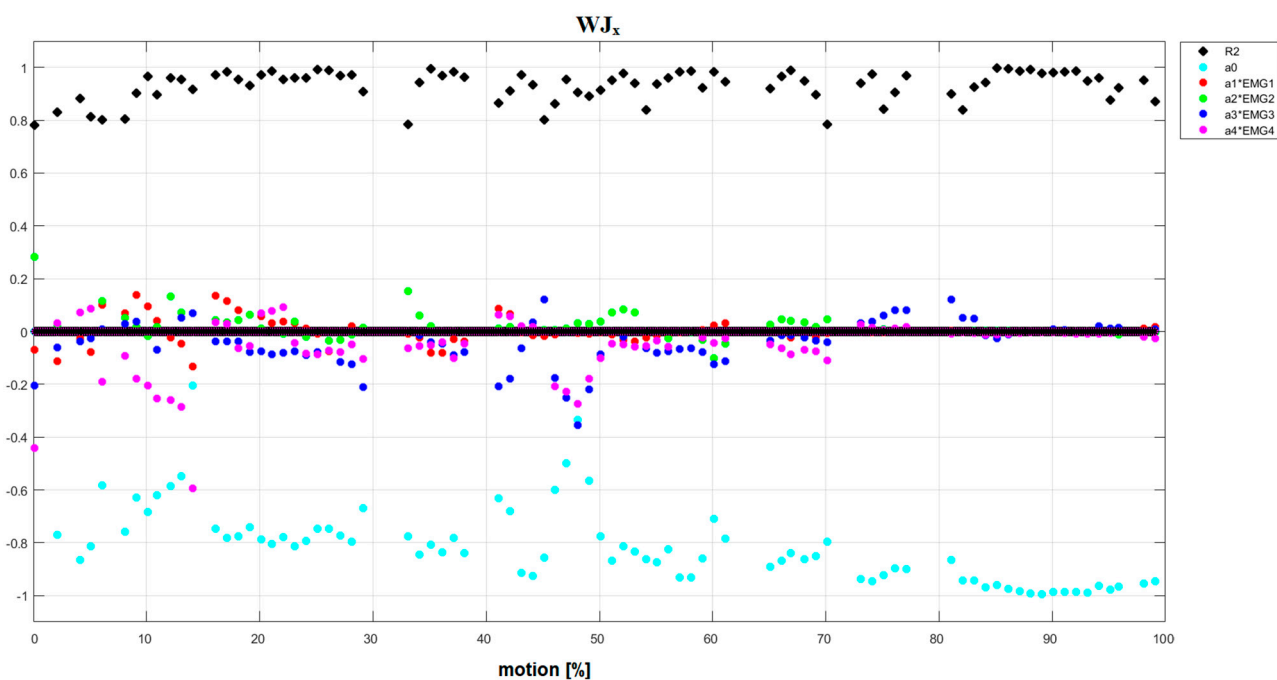

**Figure S24.** Results of linear piecewise multi-regression analysis performed in each tested fragment of the motion for reference subject in Motion 2. Natural conditions.  $WJ_x$ .

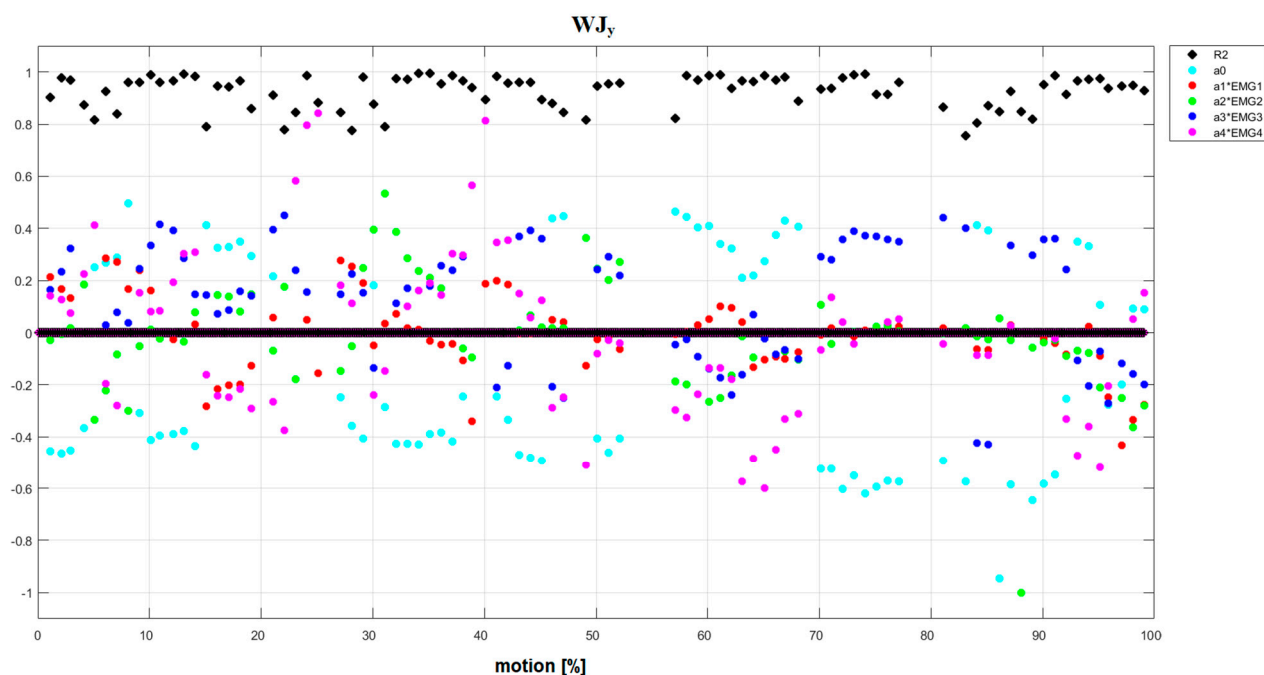

**Figure S25.** Results of linear piecewise multi-regression analysis performed in each tested fragment of the motion for reference subject in Motion 2. Natural conditions.  $WJ_y$ .

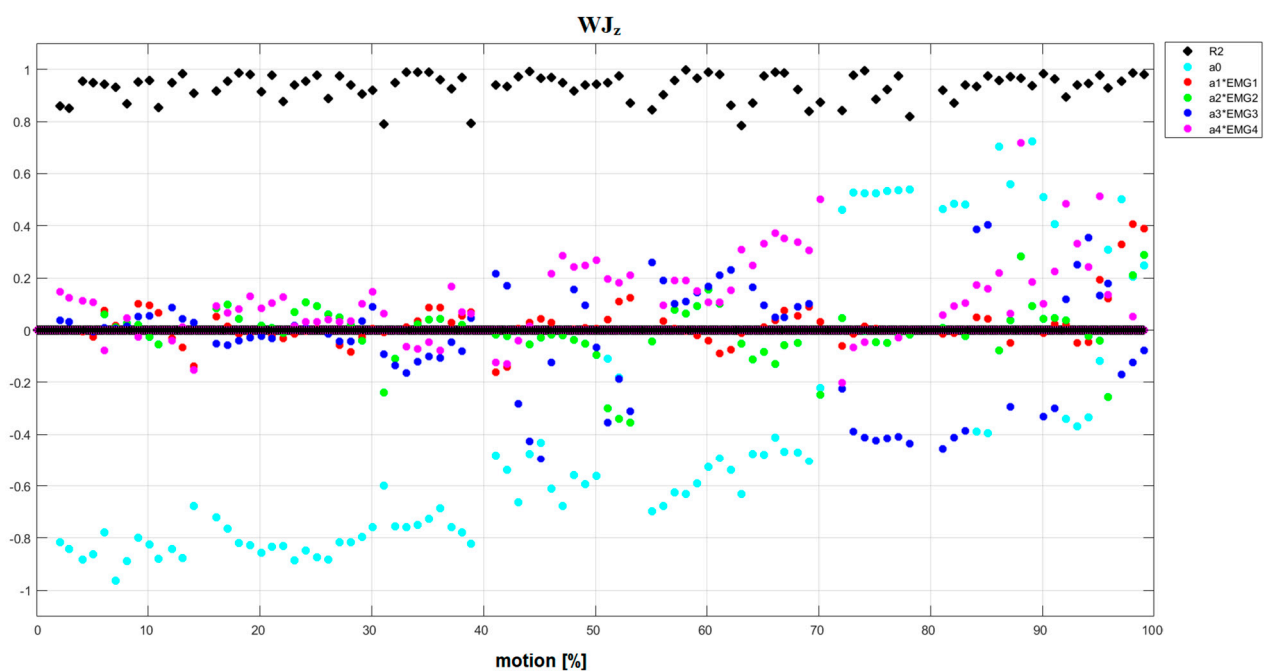

**Figure S26.** Results of linear piecewise multi-regression analysis performed in each tested fragment of the motion for reference subject in Motion 2. Natural conditions.  $WJ_z$ .

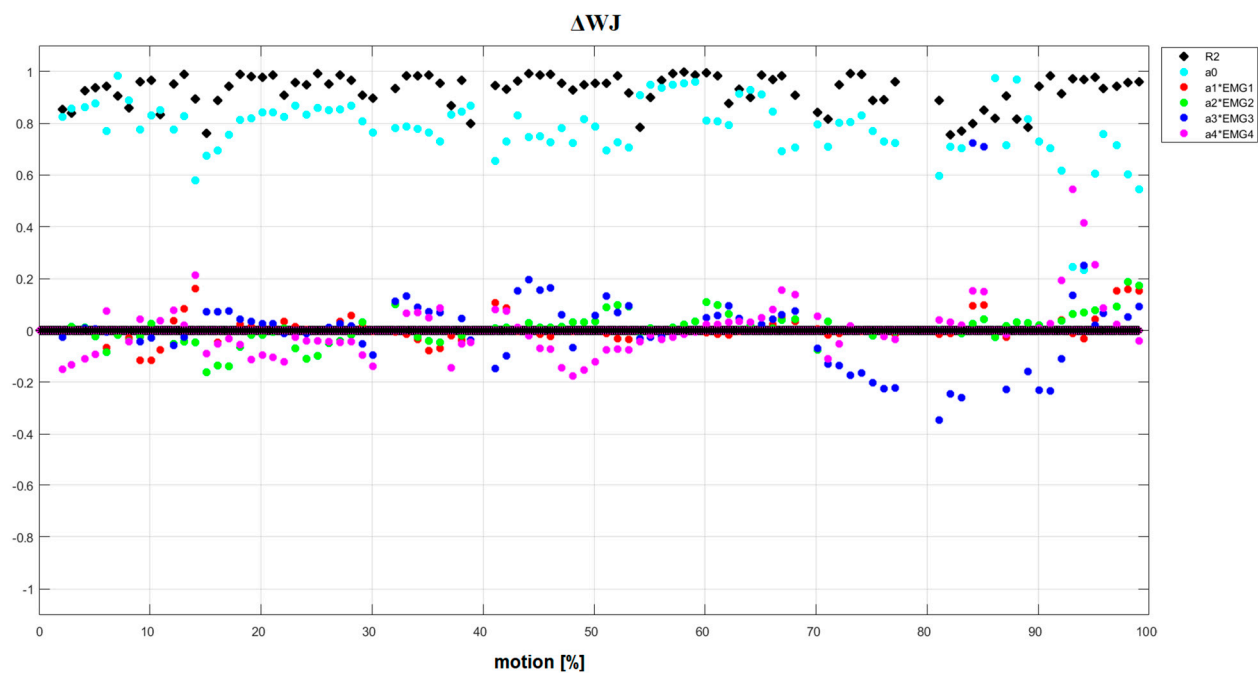

**Figure S27.** Results of linear piecewise multi-regression analysis performed in each tested fragment of the motion for reference subject in Motion 2. Natural conditions.  $\Delta W$ .

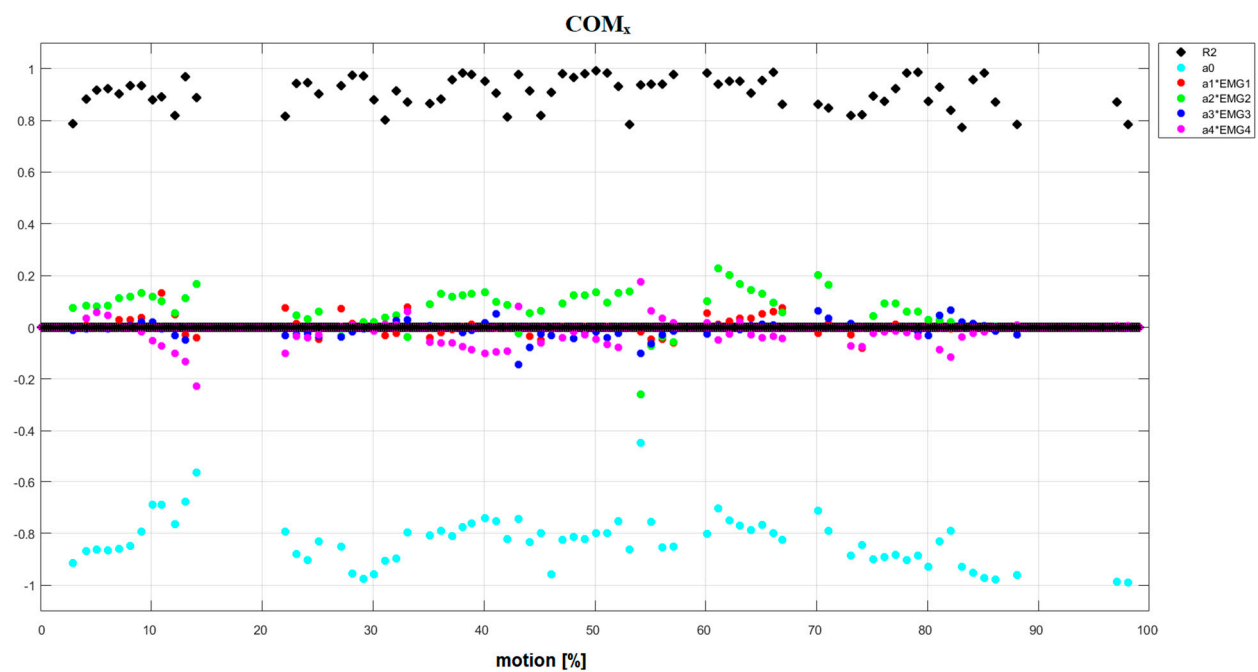

**Figure S28.** Results of linear piecewise multi-regression analysis performed in each tested fragment of the motion for reference subject in Motion 2. Passive manipulator conditions.  $COM_x$ .

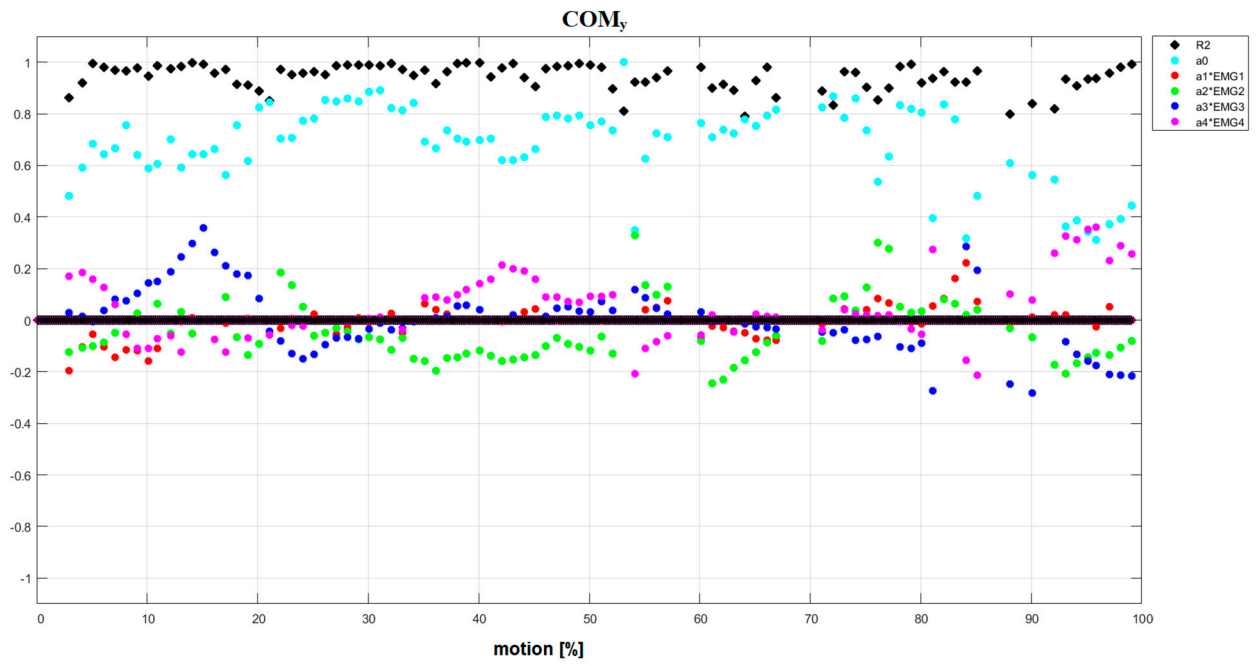

**Figure S29.** Results of linear piecewise multi-regression analysis performed in each tested fragment of the motion for reference subject in Motion 2. Passive manipulator conditions.  $COM_y$ .

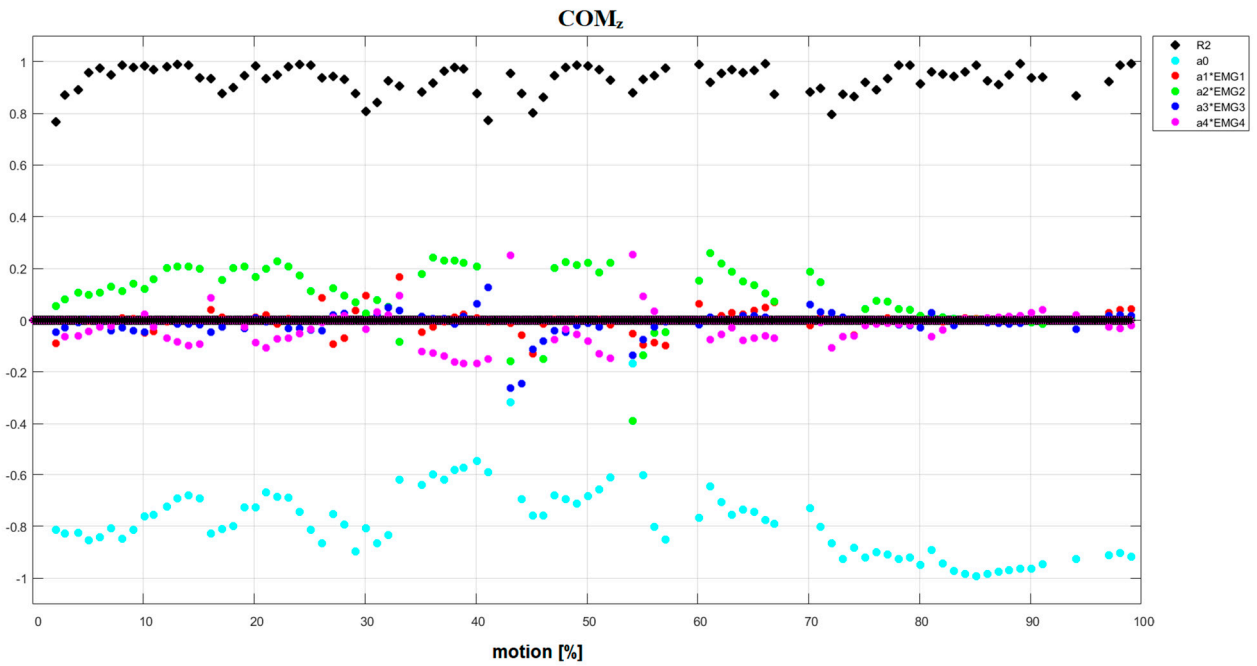

**Figure S30.** Results of linear piecewise multi-regression analysis performed in each tested fragment of the motion for reference subject in Motion 2. Passive manipulator conditions.  $COM_z$ .

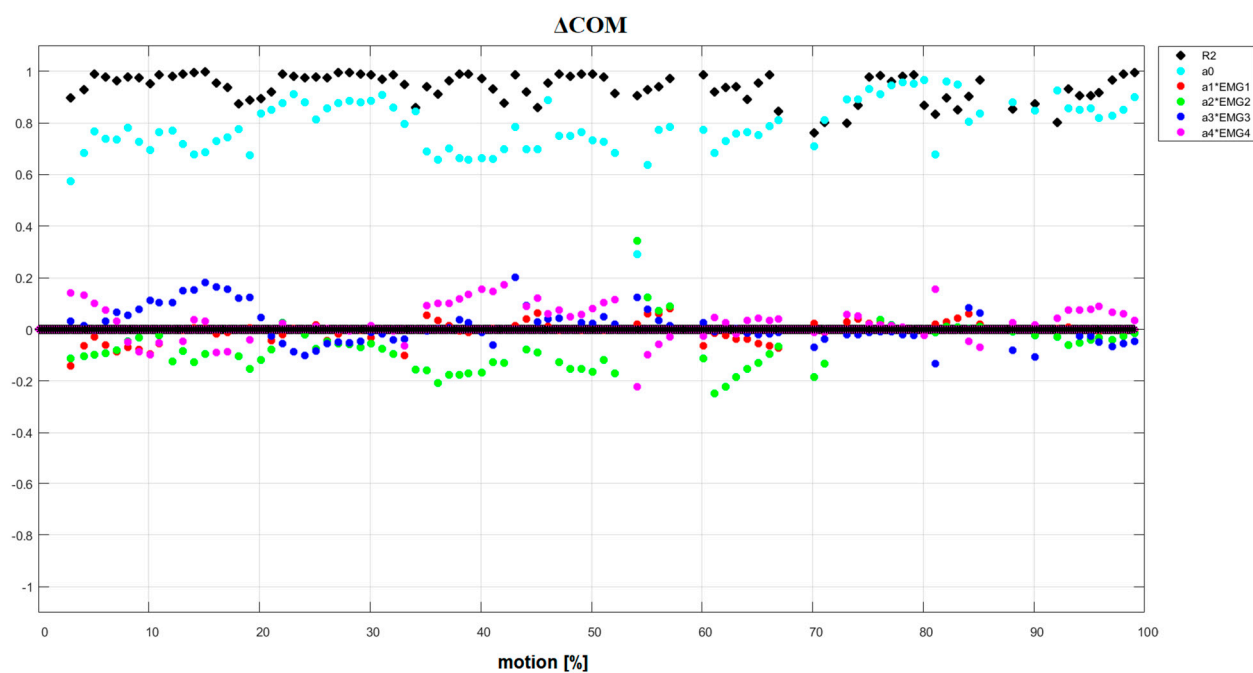

**Figure S31.** Results of linear piecewise multi-regression analysis performed in each tested fragment of the motion for reference subject in Motion 2. Passive manipulator conditions.  $\Delta COM$ .

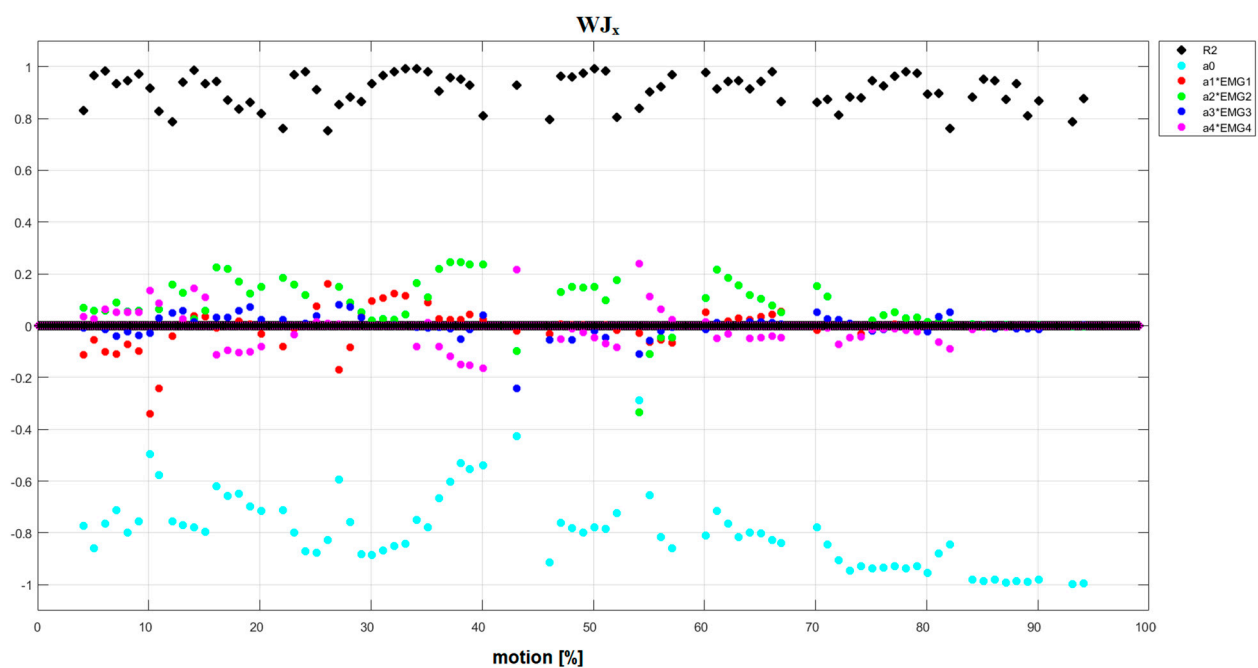

**Figure S32.** Results of linear piecewise multi-regression analysis performed in each tested fragment of the motion for reference subject in Motion 2. Passive manipulator conditions.  $WJ_x$ .

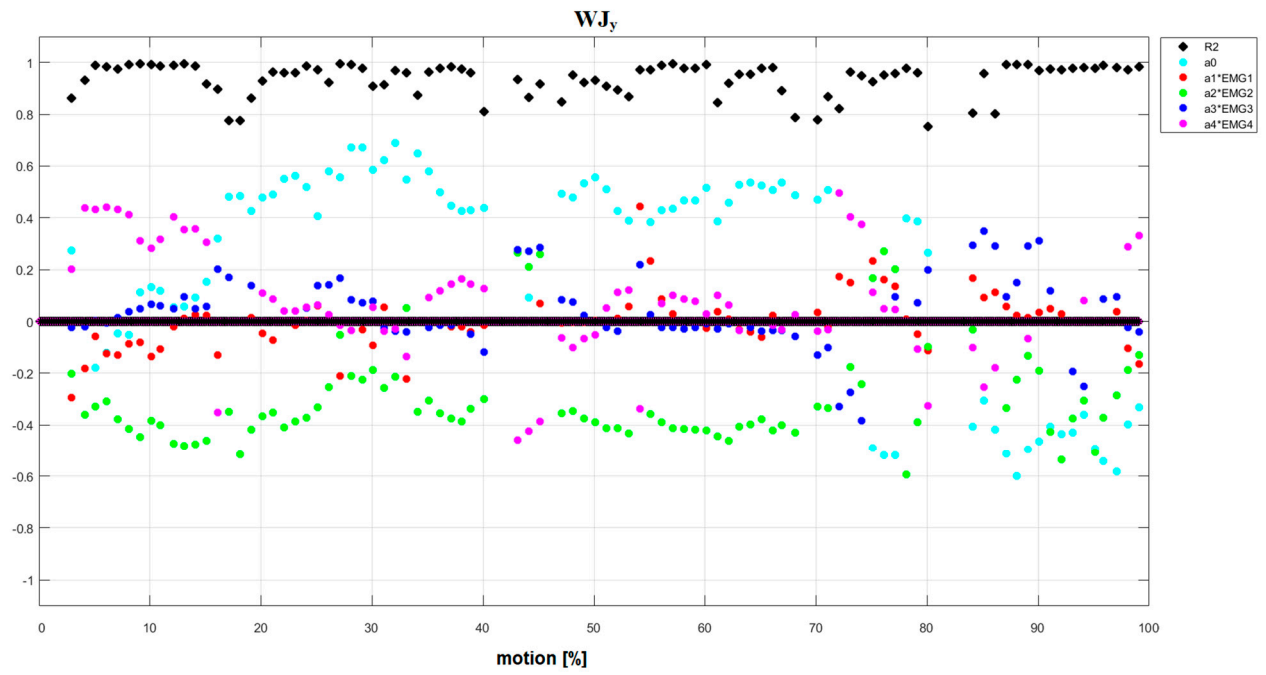

**Figure S33.** Results of linear piecewise multi-regression analysis performed in each tested fragment of the motion for reference subject in Motion 2. Passive manipulator conditions.  $WJ_y$ .

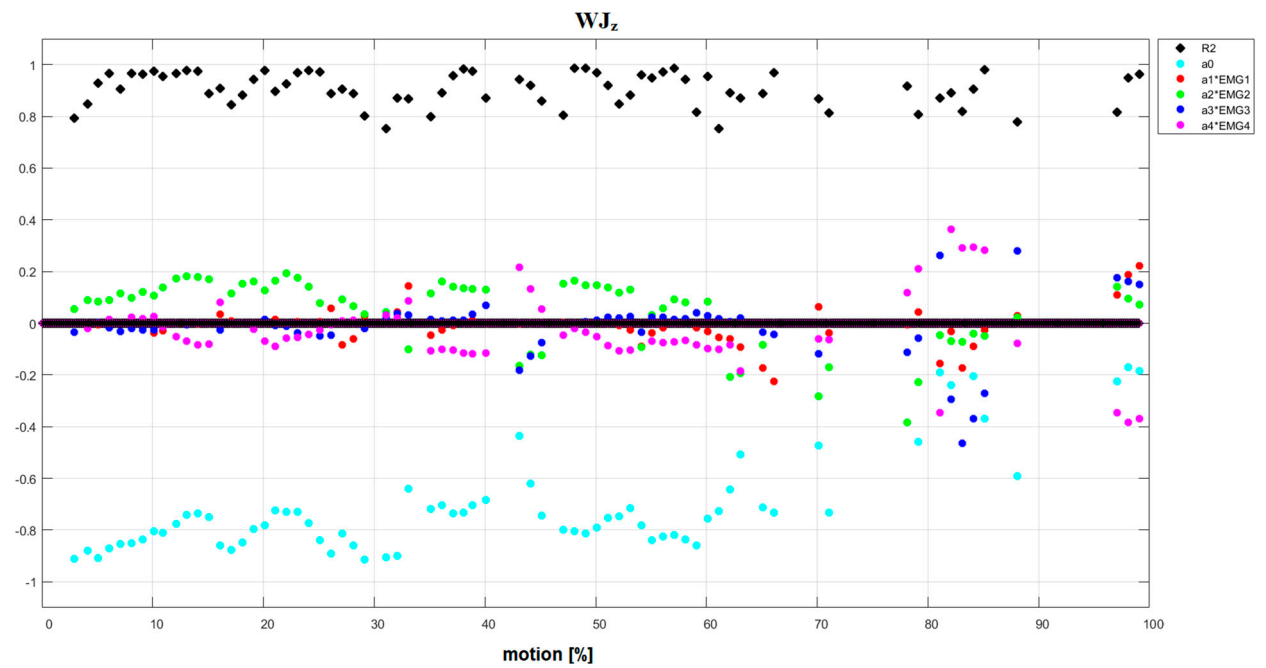

**Figure S34.** Results of linear piecewise multi-regression analysis performed in each tested fragment of the motion for reference subject in Motion 2. Passive manipulator conditions.  $WJ_z$ .



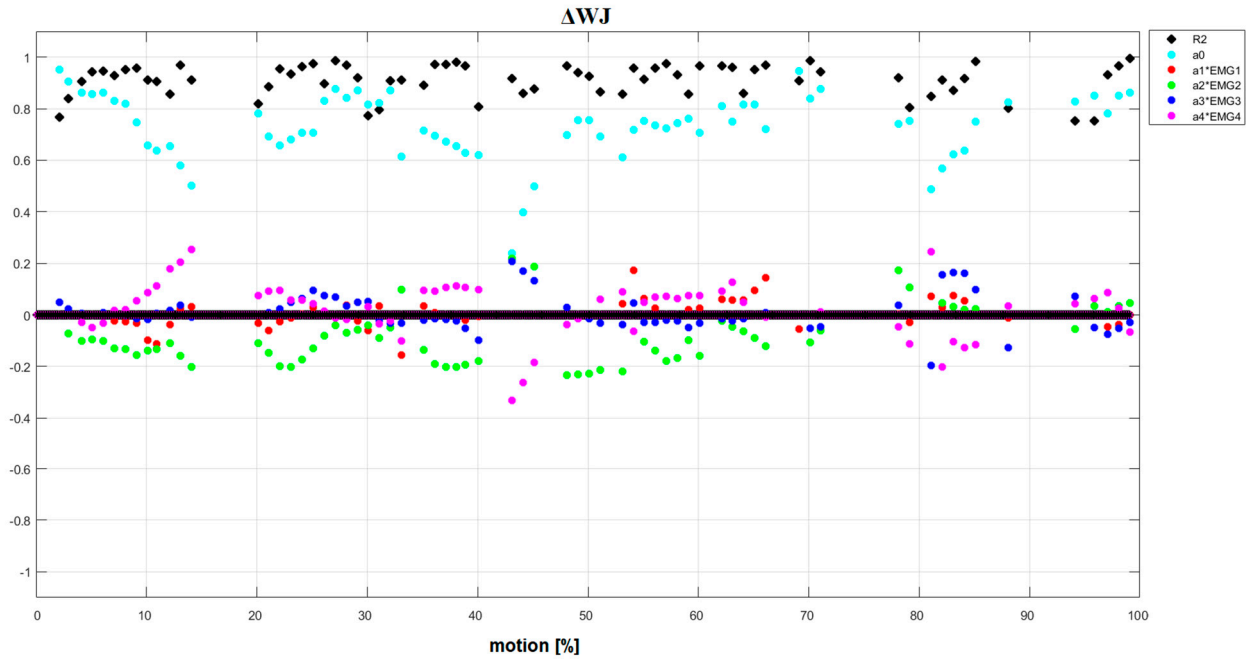

**Figure S35.** Results of linear piecewise multi-regression analysis performed in each tested fragment of the motion for reference subject in Motion 2. Passive manipulator conditions.  $\Delta W$ .

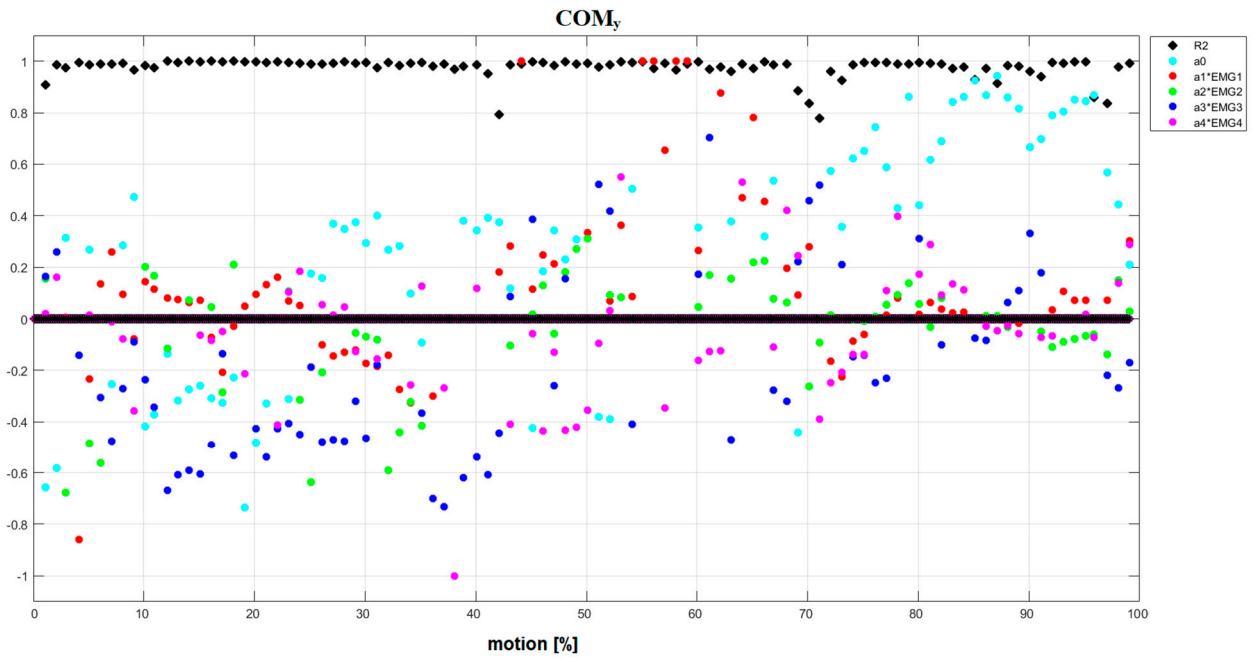

**Figure S36.** Results of linear piecewise multi-regression analysis performed in each tested fragment of the motion for DMD patient in Motion 1. Natural conditions.  $COM_y$ .

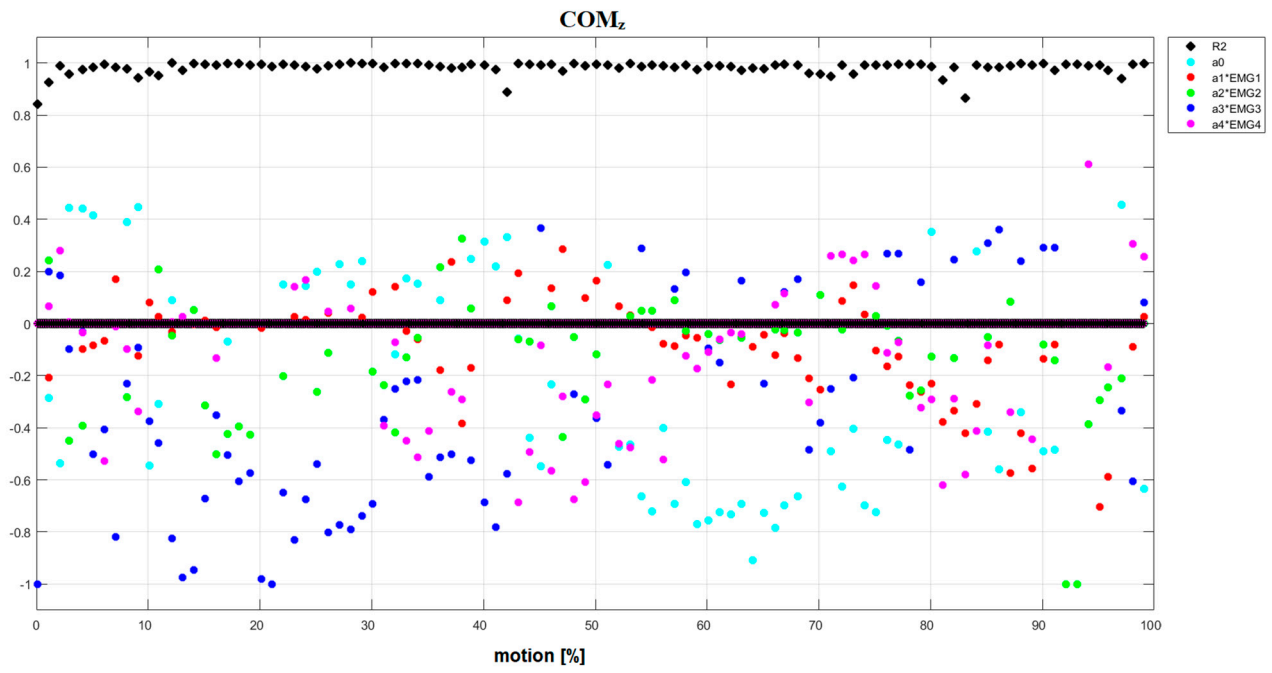

**Figure S37.** Results of linear piecewise multi-regression analysis performed in each tested fragment of the motion for DMD patient in Motion 1. Natural conditions. COM<sub>z</sub>.

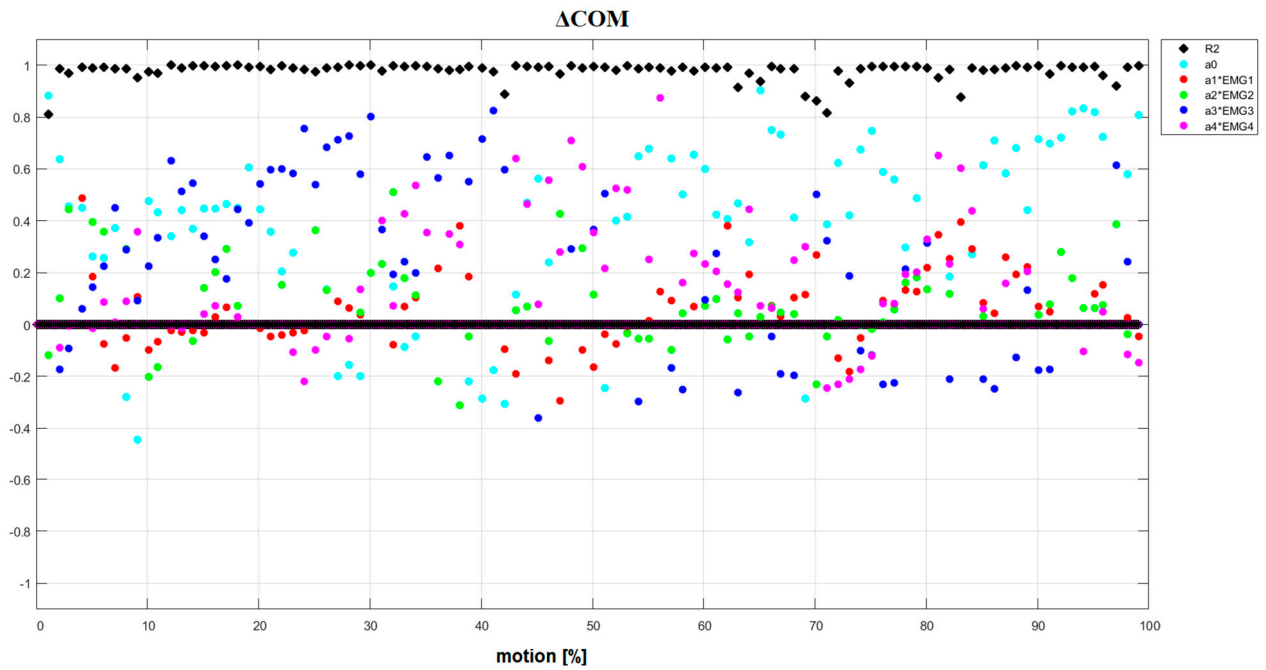

**Figure S38.** Results of linear piecewise multi-regression analysis performed in each tested fragment of the motion for DMD patient in Motion 1. Natural conditions. ΔCOM.

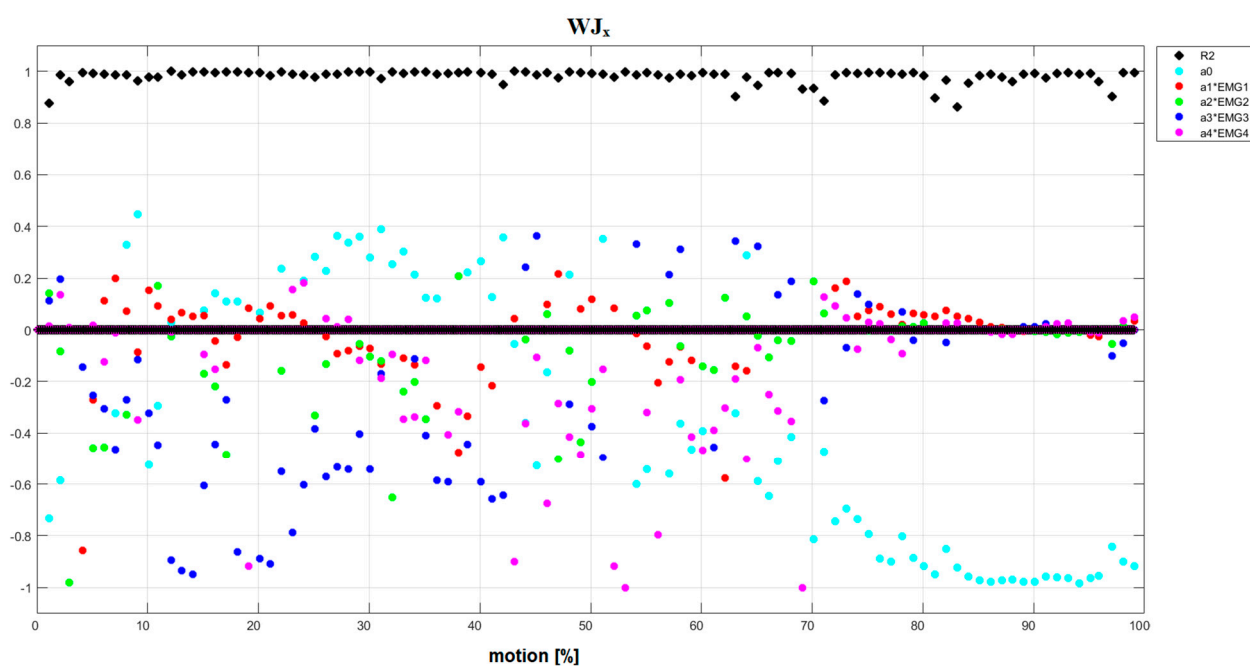

**Figure S39.** Results of linear piecewise multi-regression analysis performed in each tested fragment of the motion for DMD patient in Motion 1. Natural conditions.  $WJ_x$ .

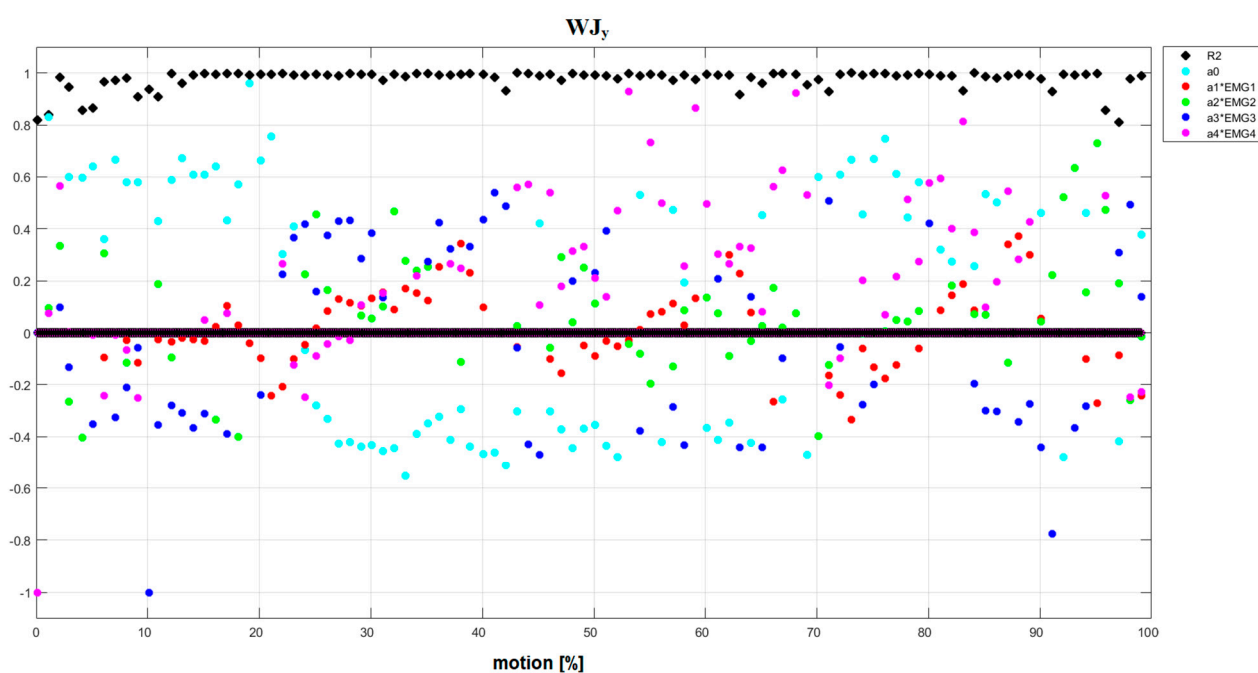

**Figure S40.** Results of linear piecewise multi-regression analysis performed in each tested fragment of the motion for DMD patient in Motion 1. Natural conditions.  $WJ_y$ .

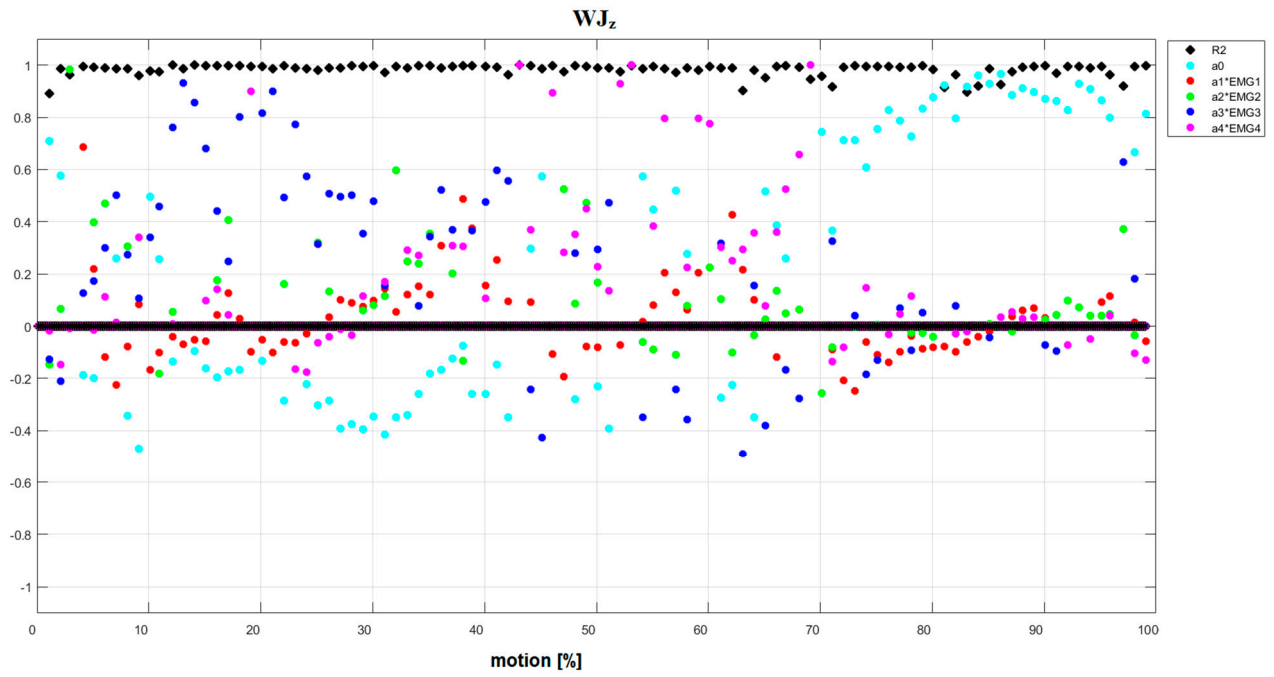

**Figure S41.** Results of linear piecewise multi-regression analysis performed in each tested fragment of the motion for DMD patient in Motion 1. Natural conditions.  $WJ_z$ .

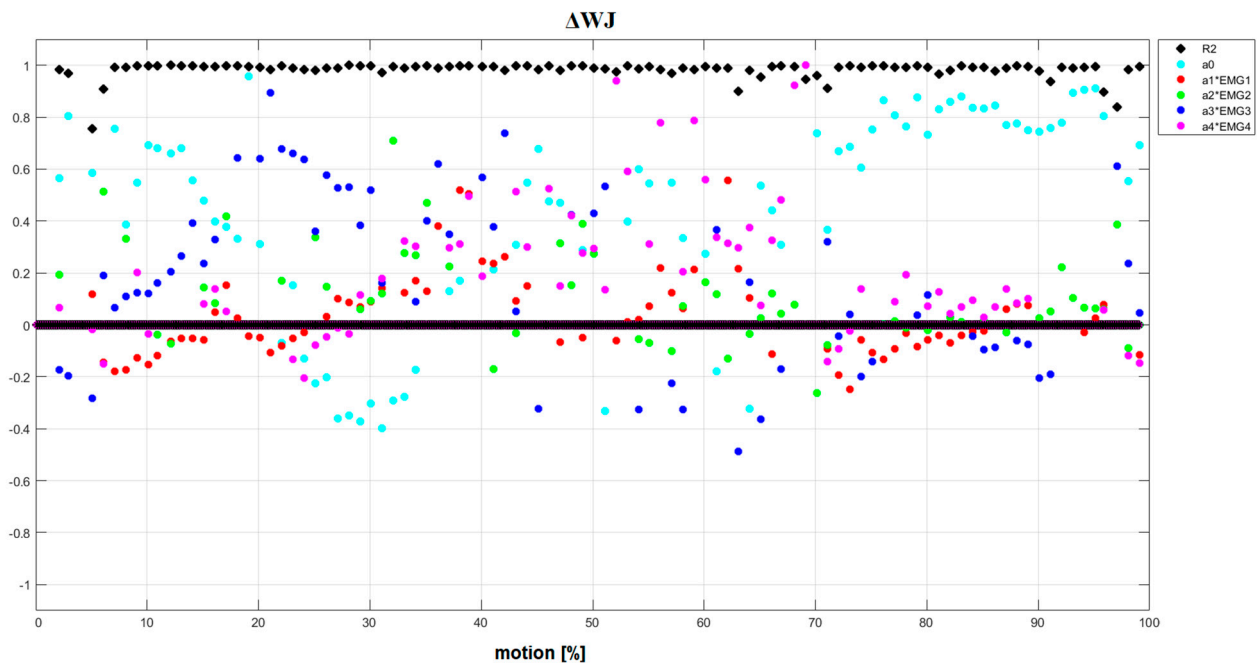

**Figure S42.** Results of linear piecewise multi-regression analysis performed in each tested fragment of the motion for DMD patient in Motion 1. Natural conditions.  $\Delta WJ$ .

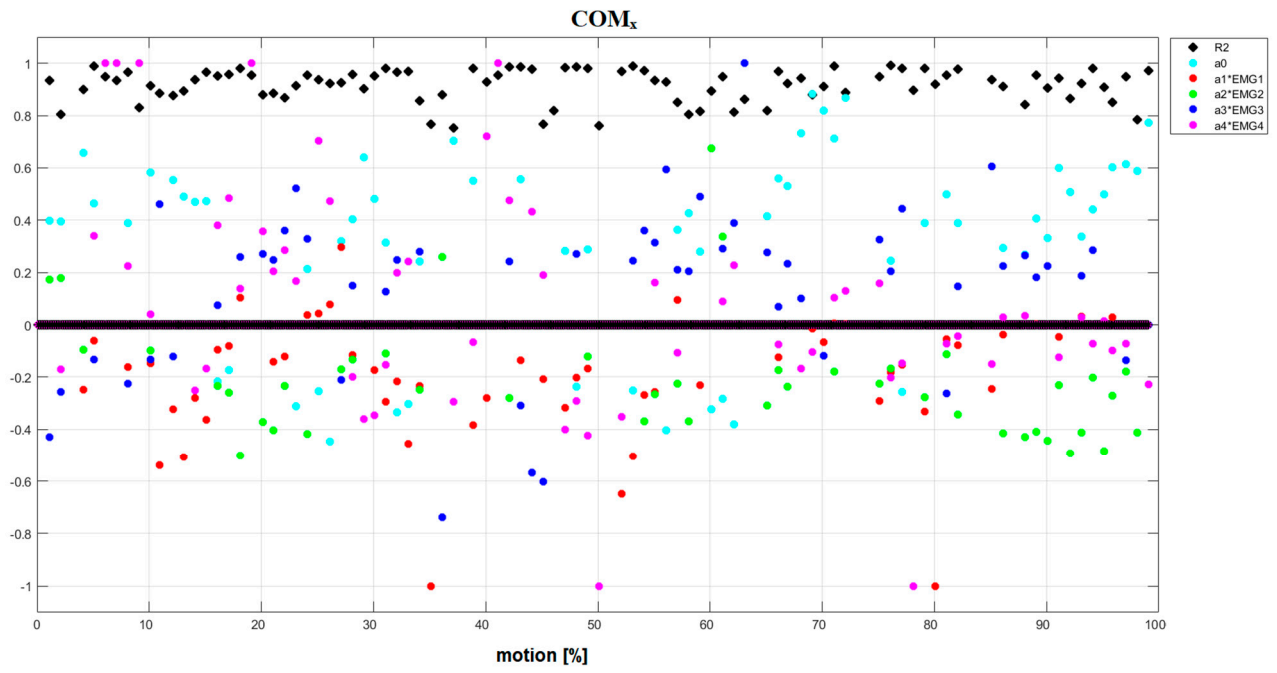

**Figure S43.** Results of linear piecewise multi-regression analysis performed in each tested fragment of the motion for DMD patient in Motion 1. Passive manipulator conditions.  $COM_x$ .

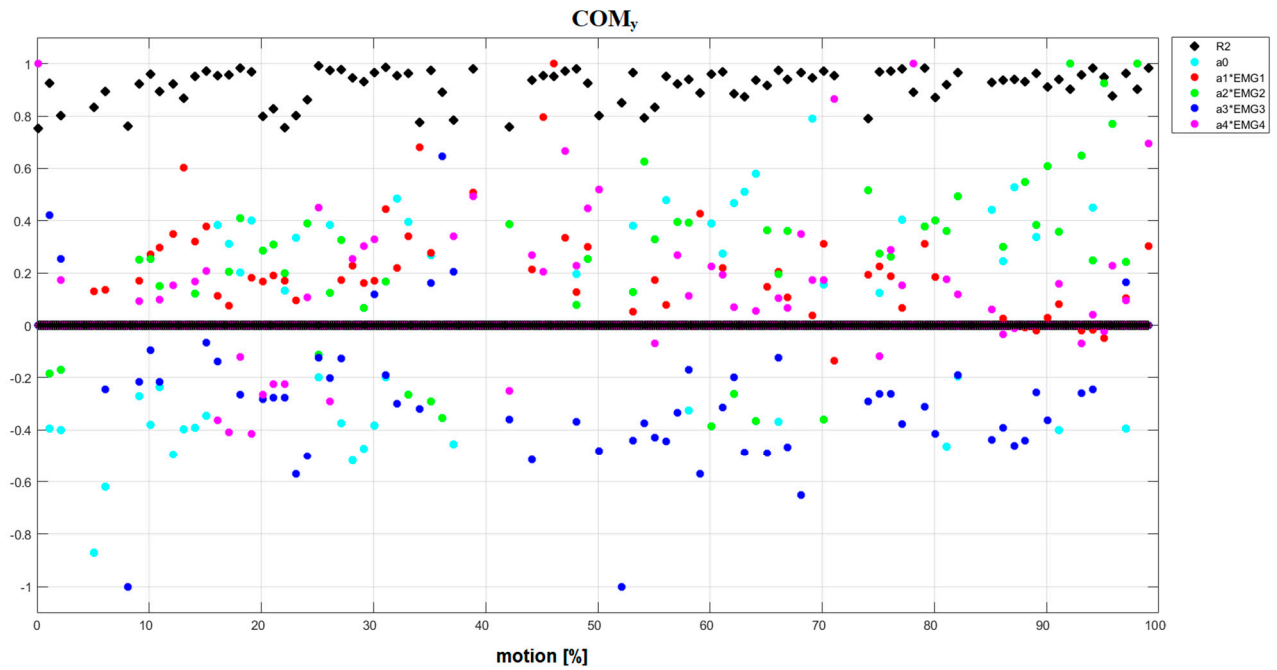

**Figure S44.** Results of linear piecewise multi-regression analysis performed in each tested fragment of the motion for DMD patient in Motion 1. Passive manipulator conditions.  $COM_y$ .

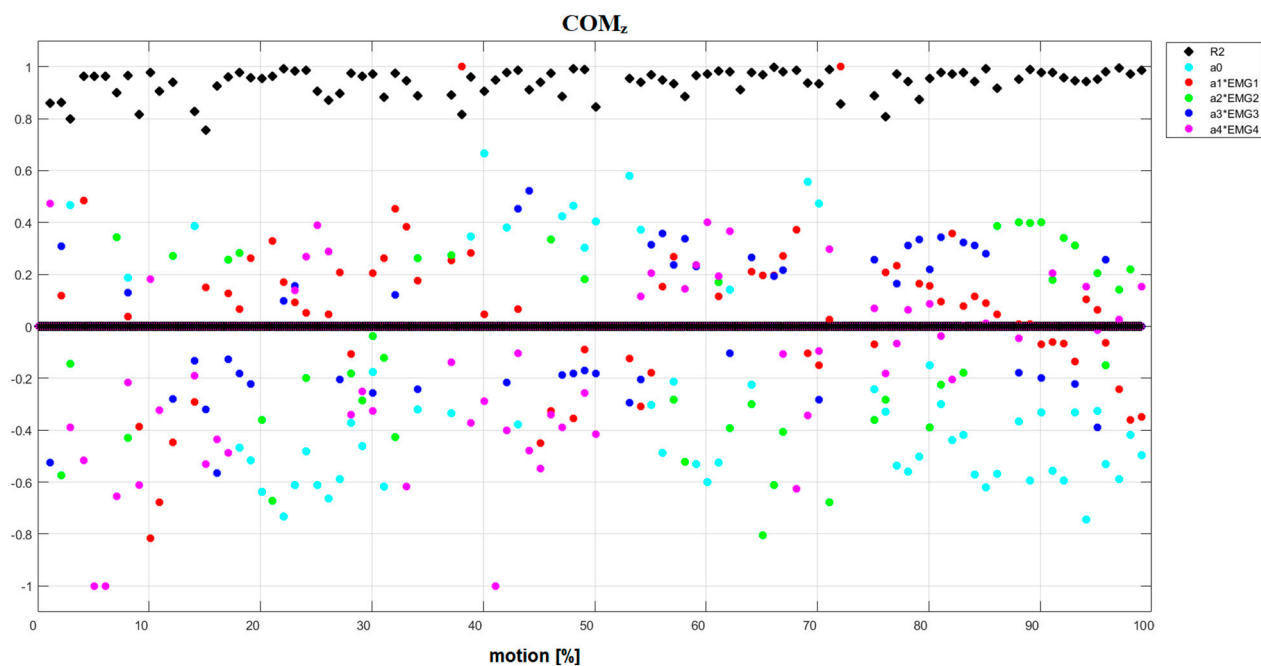

**Figure S45.** Results of linear piecewise multi-regression analysis performed in each tested fragment of the motion for DMD patient in Motion 1. Passive manipulator conditions.  $COM_z$ .

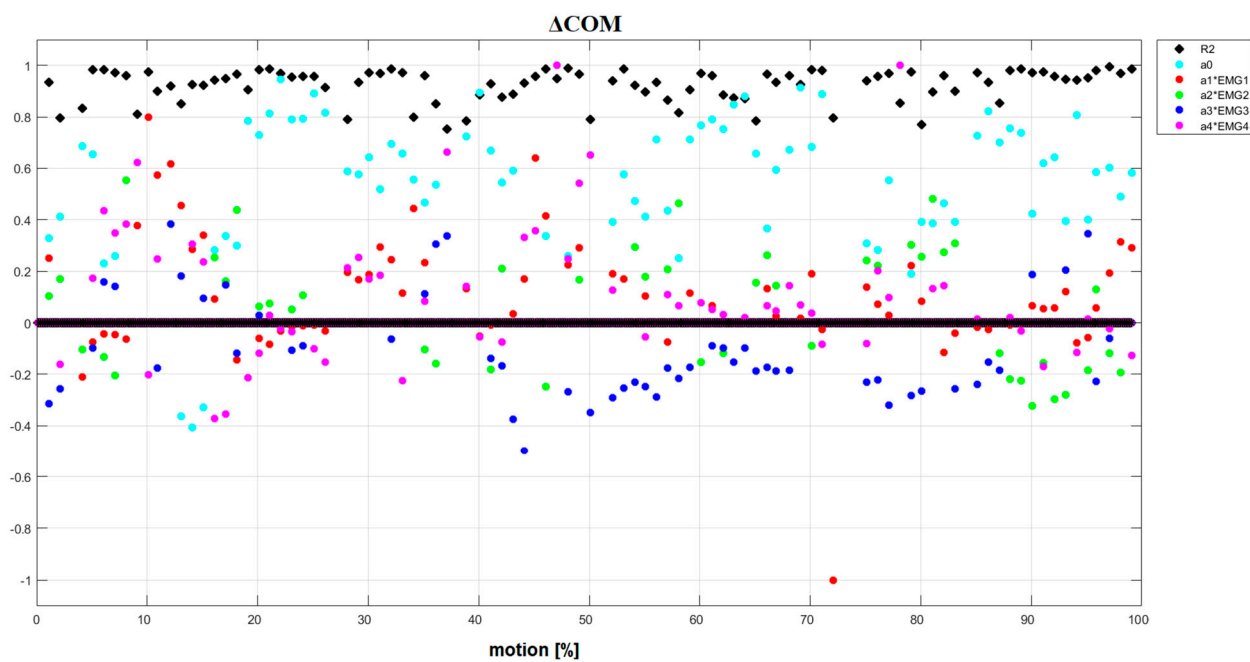

**Figure S46.** Results of linear piecewise multi-regression analysis performed in each tested fragment of the motion for DMD patient in Motion 1. Passive manipulator conditions.  $\Delta COM$ .

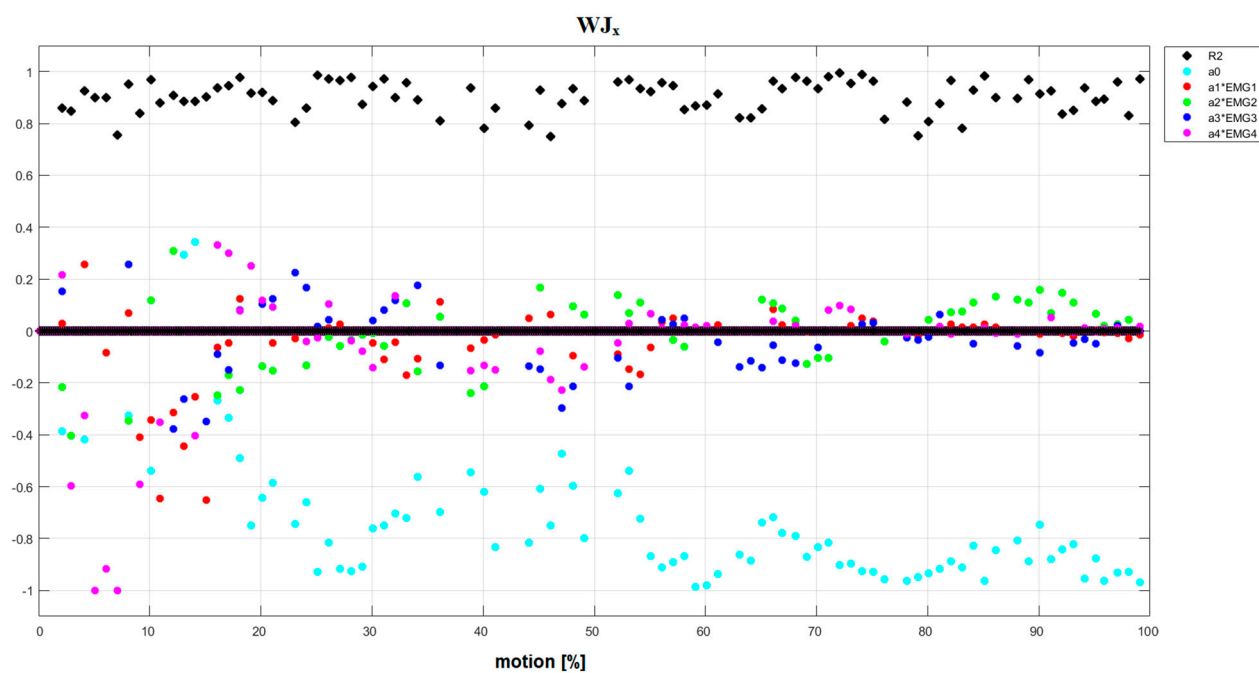

**Figure S47.** Results of linear piecewise multi-regression analysis performed in each tested fragment of the motion for DMD patient in Motion 1. Passive manipulator conditions.  $WJ_x$ .

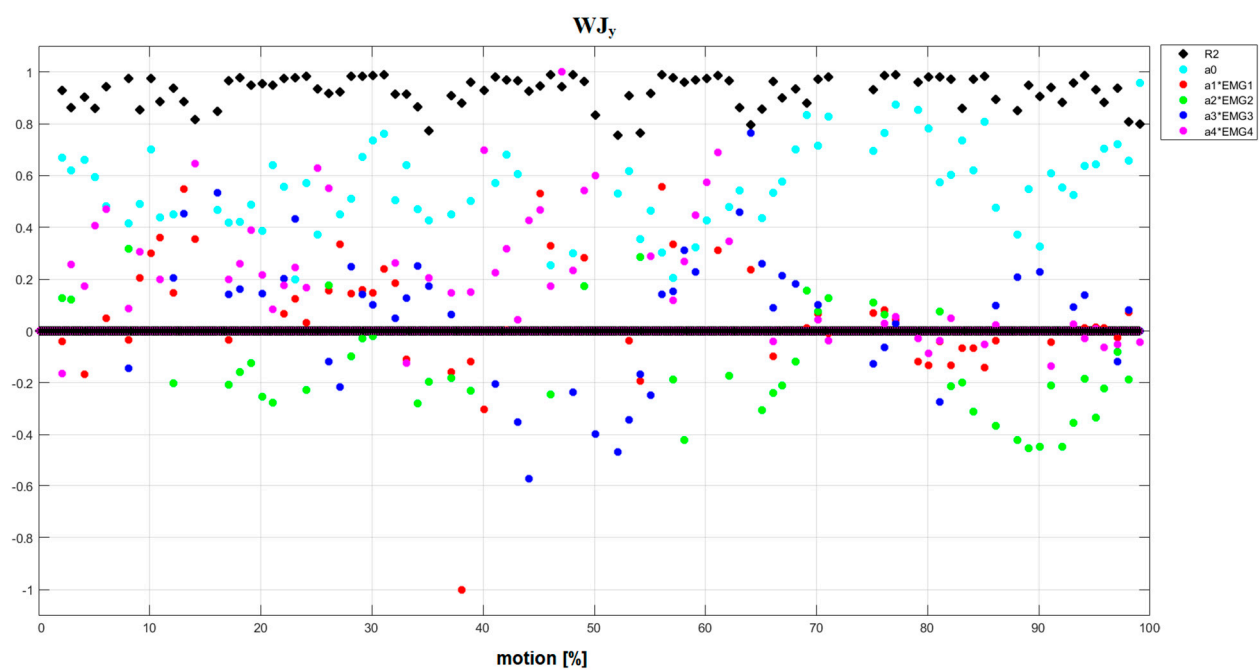

**Figure S48.** Results of linear piecewise multi-regression analysis performed in each tested fragment of the motion for DMD patient in Motion 1. Passive manipulator conditions.  $WJ_y$ .

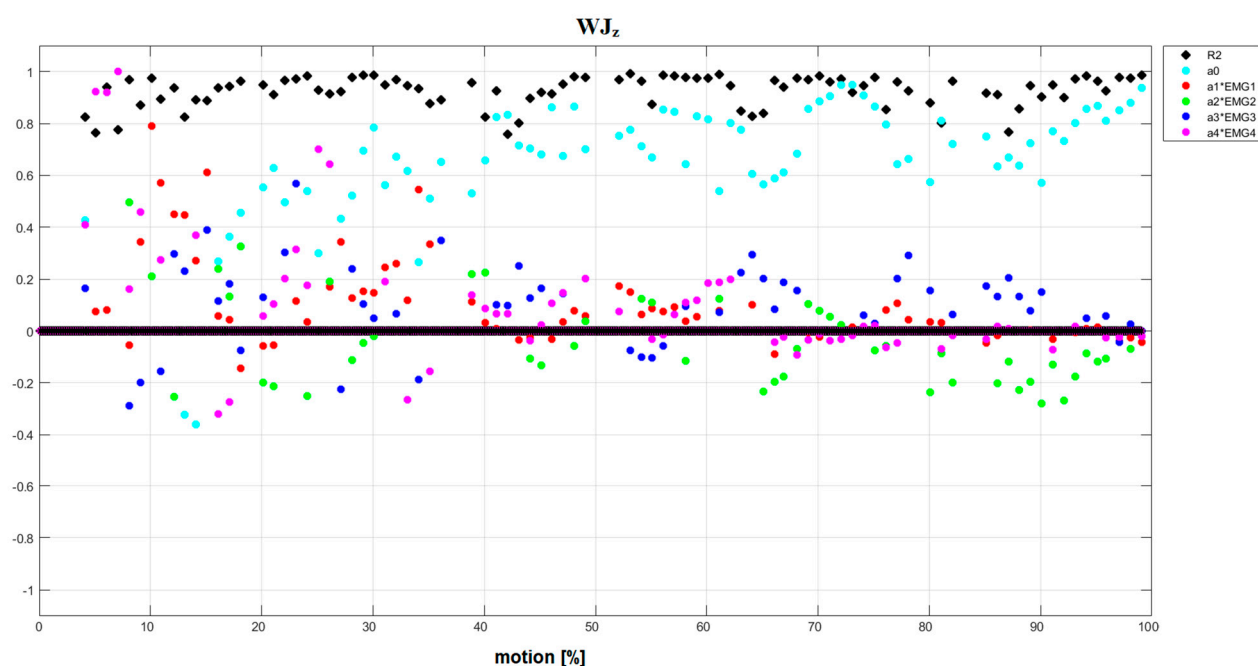

**Figure S49.** Results of linear piecewise multi-regression analysis performed in each tested fragment of the motion for DMD patient in Motion 1. Passive manipulator conditions.  $WJ_z$ .

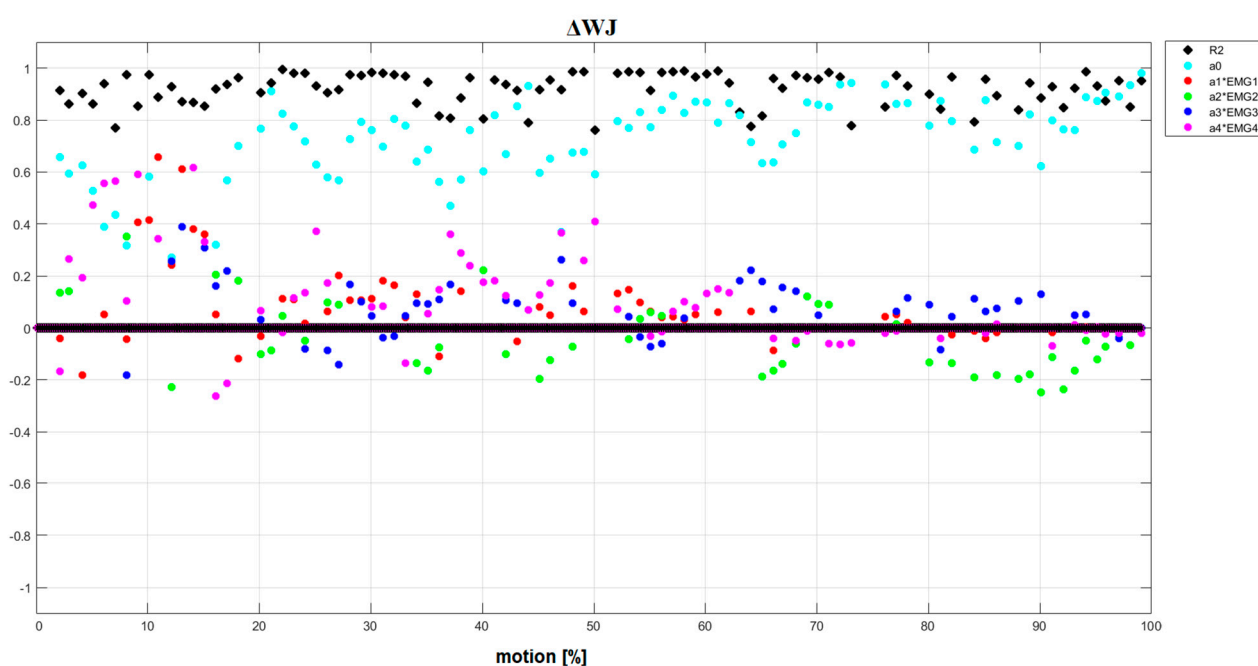

**Figure S50.** Results of linear piecewise multi-regression analysis performed in each tested fragment of the motion for DMD patient in Motion 1. Passive manipulator conditions.  $\Delta W$ .



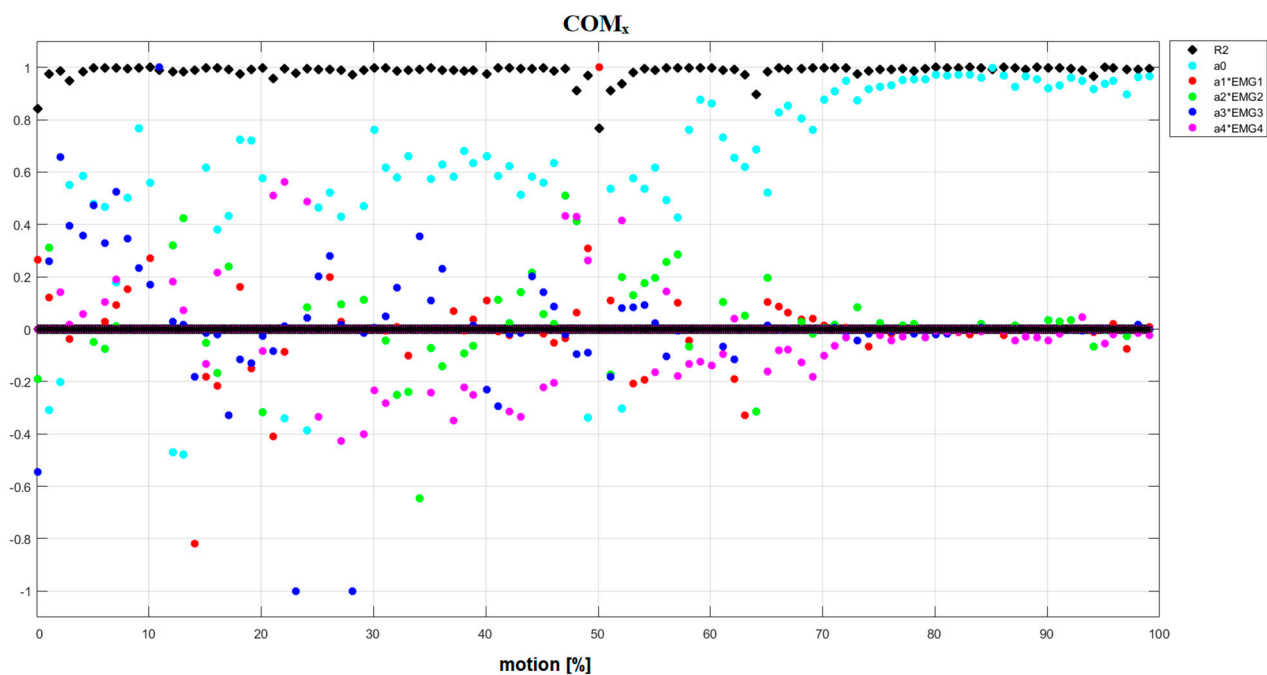

**Figure S51.** Results of linear piecewise multi-regression analysis performed in each tested fragment of the motion for DMD patient in Motion 2. Natural conditions. COM<sub>x</sub>.

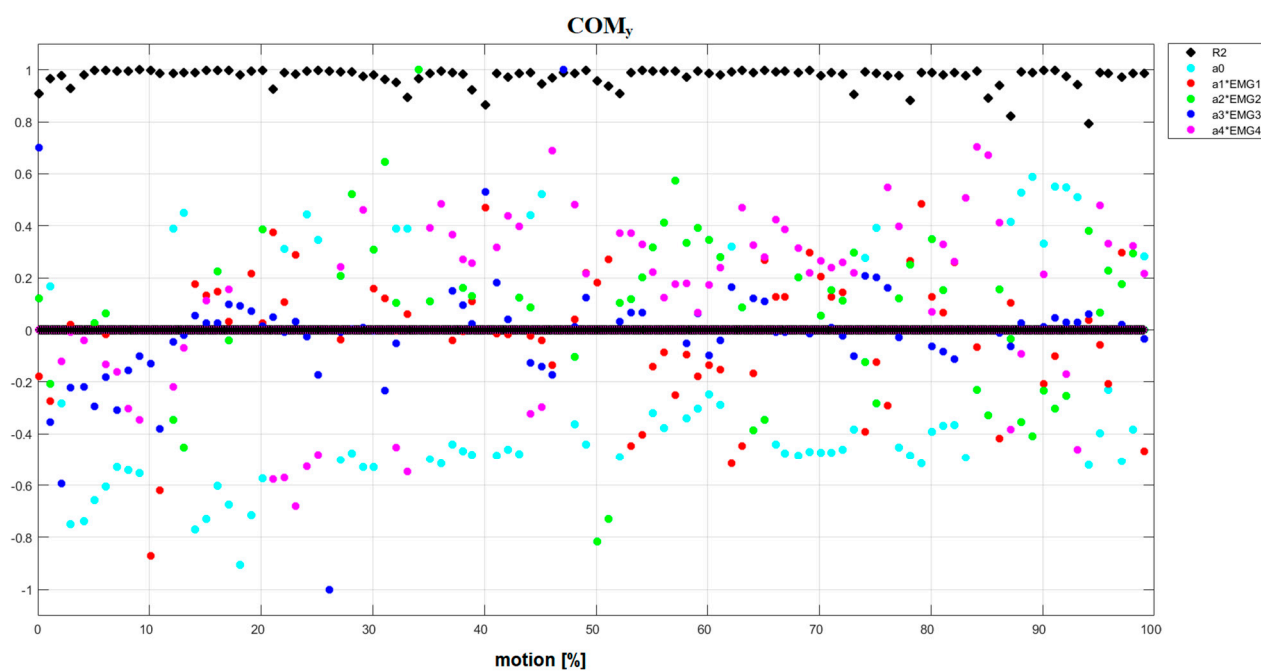

**Figure S52.** Results of linear piecewise multi-regression analysis performed in each tested fragment of the motion for DMD patient in Motion 2. Natural conditions. COM<sub>y</sub>.

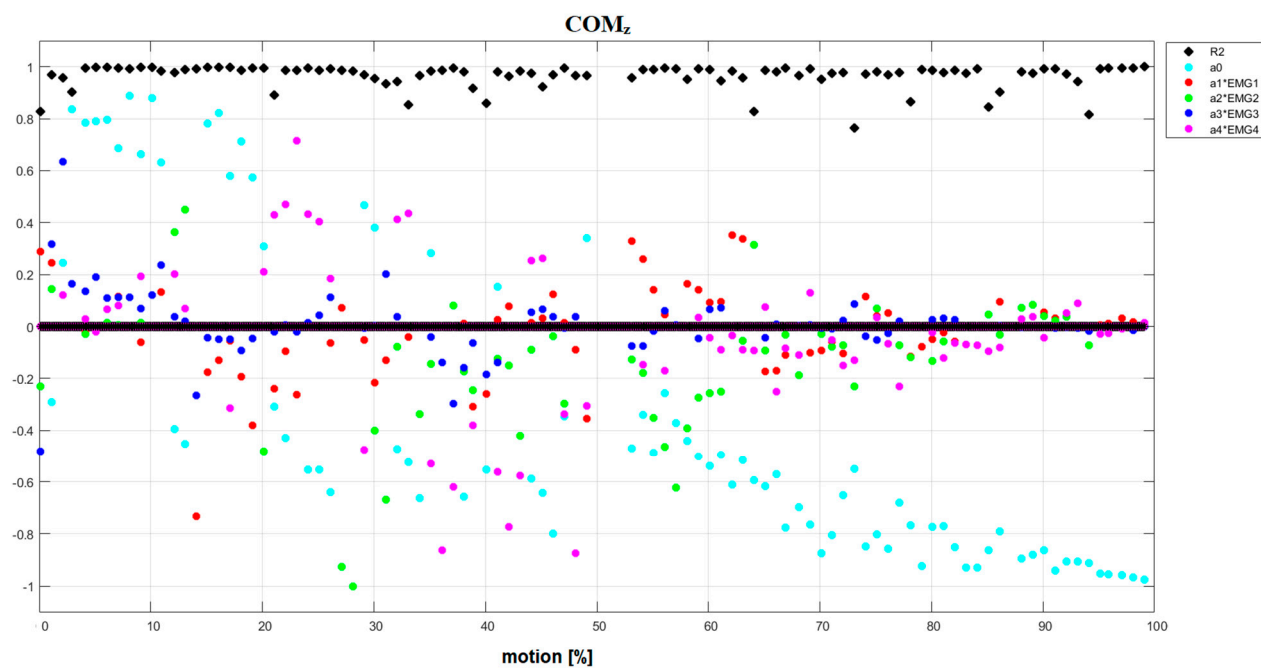

**Figure S53.** Results of linear piecewise multi-regression analysis performed in each tested fragment of the motion for DMD patient in Motion 2. Natural conditions.  $COM_z$ .

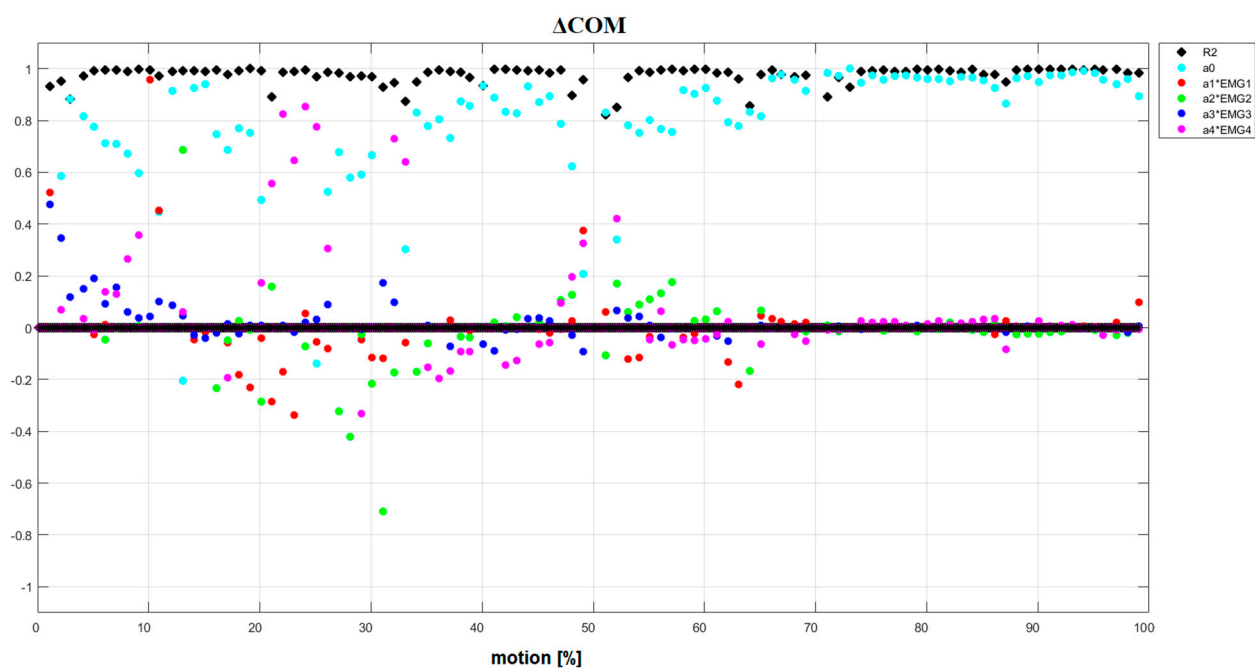

**Figure S54.** Results of linear piecewise multi-regression analysis performed in each tested fragment of the motion for DMD patient in Motion 2. Natural conditions.  $\Delta COM$ .

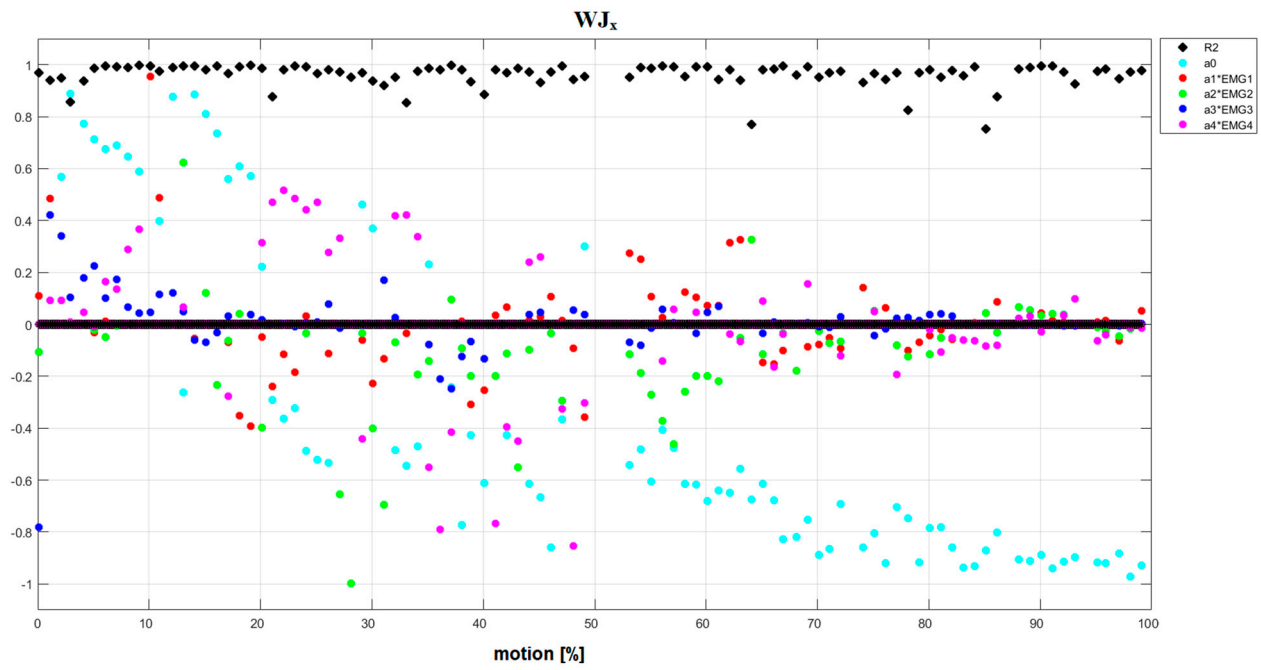

**Figure S55.** Results of linear piecewise multi-regression analysis performed in each tested fragment of the motion for DMD patient in Motion 2. Natural conditions.  $WJ_x$ .

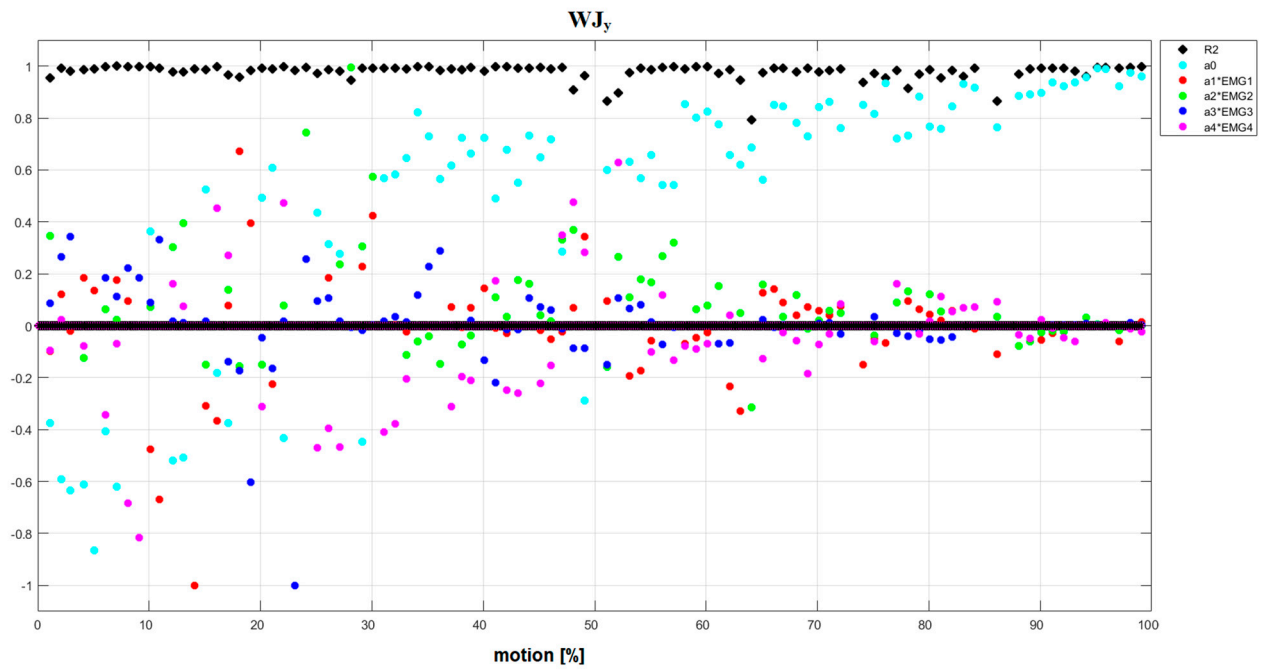

**Figure S56.** Results of linear piecewise multi-regression analysis performed in each tested fragment of the motion for DMD patient in Motion 2. Natural conditions.  $WJ_y$ .

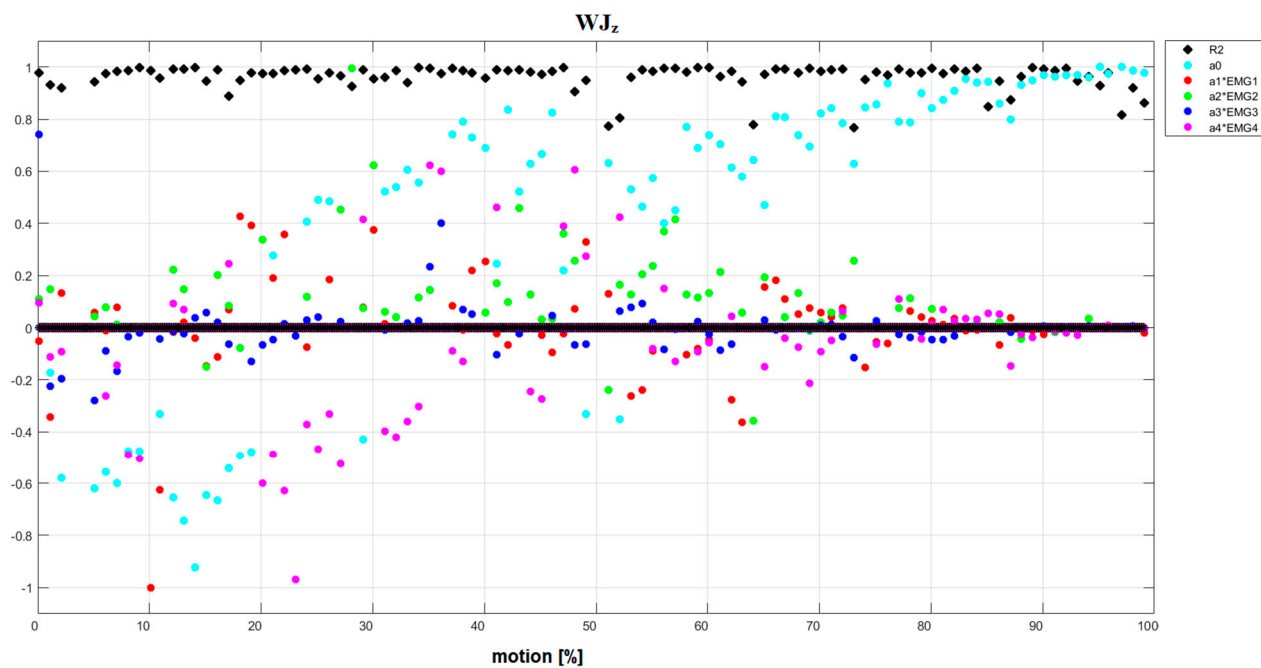

**Figure S57.** Results of linear piecewise multi-regression analysis performed in each tested fragment of the motion for DMD patient in Motion 2. Natural conditions.  $WJ_z$ .

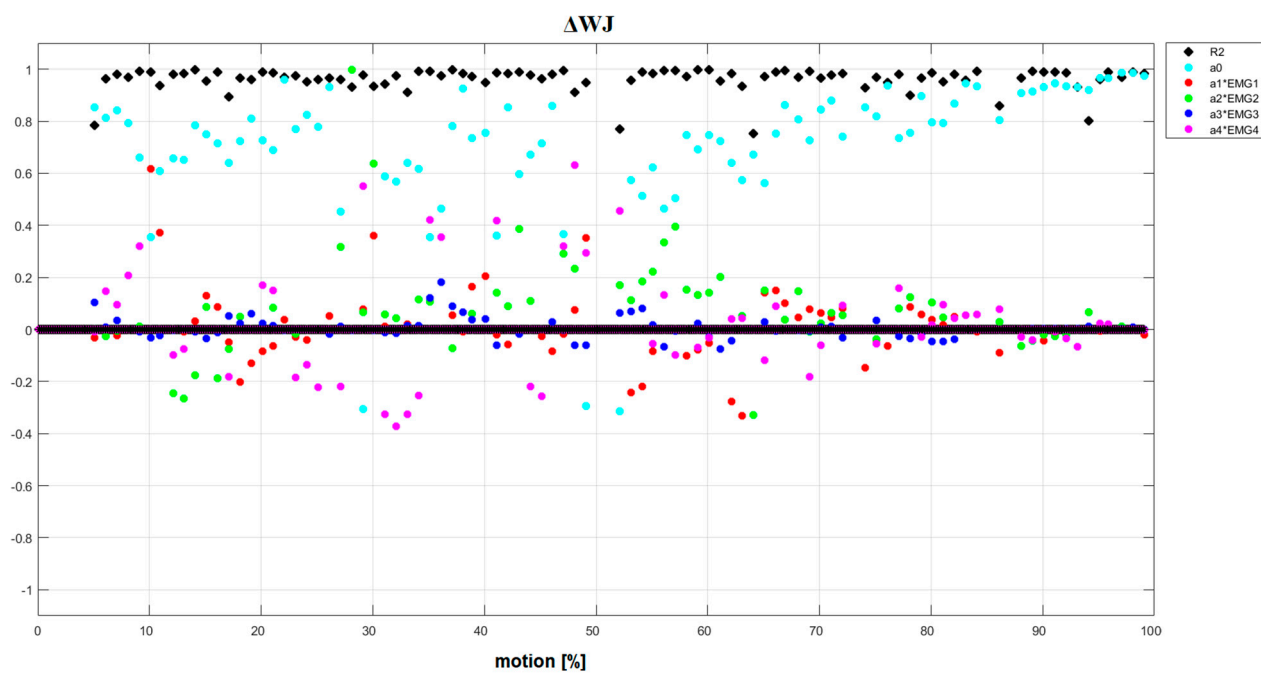

**Figure S58.** Results of linear piecewise multi-regression analysis performed in each tested fragment of the motion for DMD patient in Motion 2. Natural conditions.  $\Delta W$ .

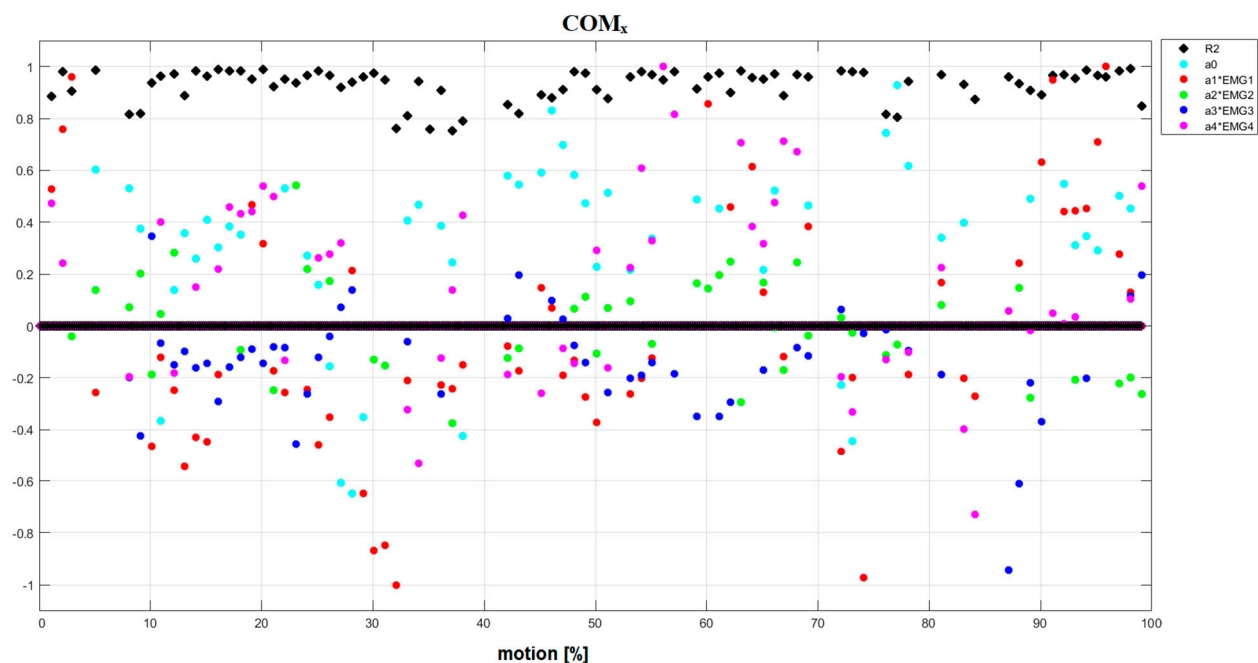

**Figure S59.** Results of linear piecewise multi-regression analysis performed in each tested fragment of the motion for DMD patient in Motion 2. Passive manipulator conditions.  $COM_x$ .

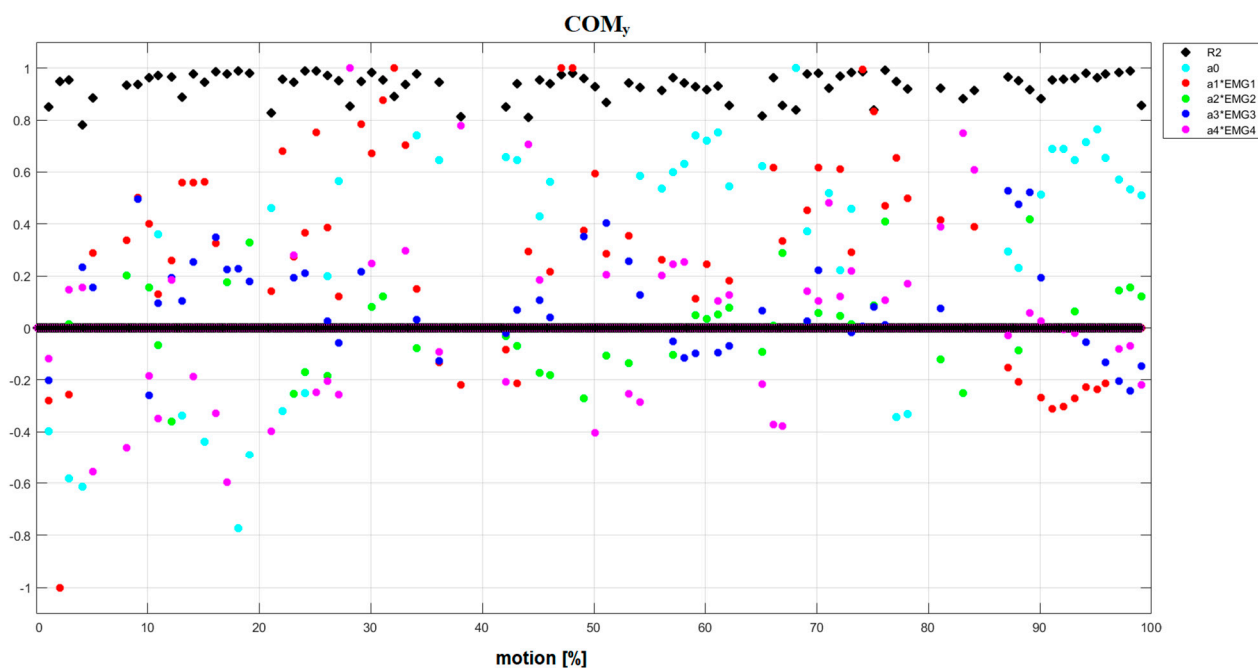

**Figure S60.** Results of linear piecewise multi-regression analysis performed in each tested fragment of the motion for DMD patient in Motion 2. Passive manipulator conditions.  $COM_y$ .

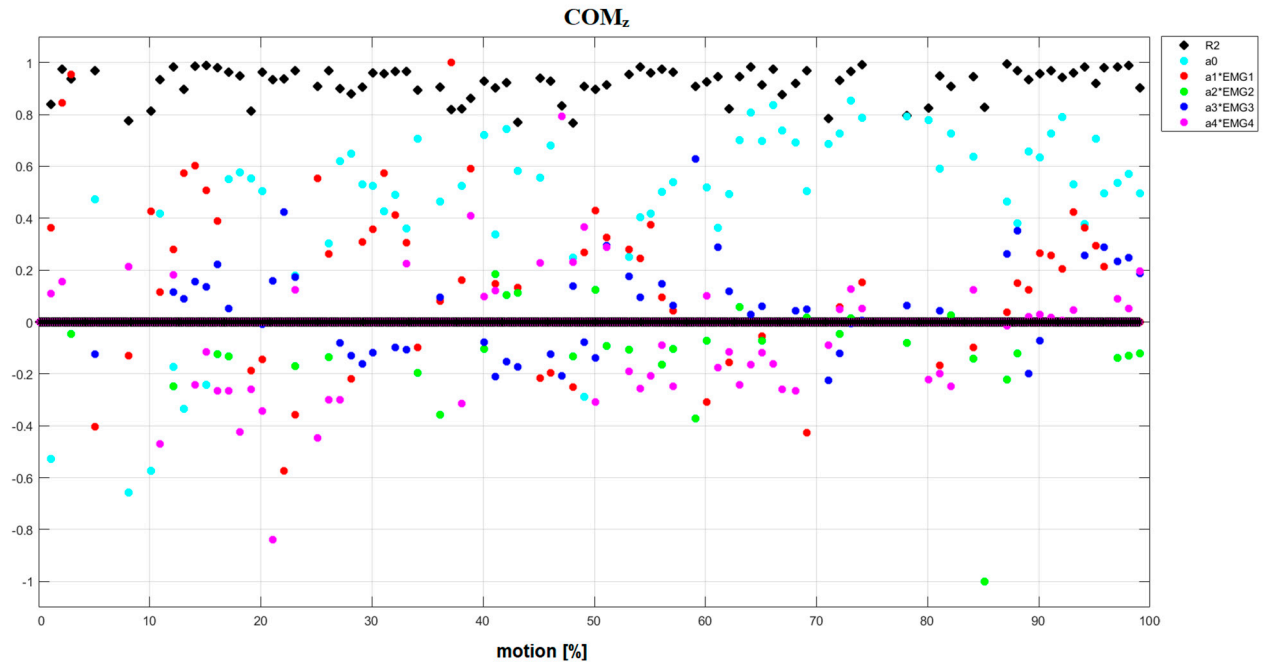

**Figure S61.** Results of linear piecewise multi-regression analysis performed in each tested fragment of the motion for DMD patient in Motion 2. Passive manipulator conditions.  $COM_z$ .

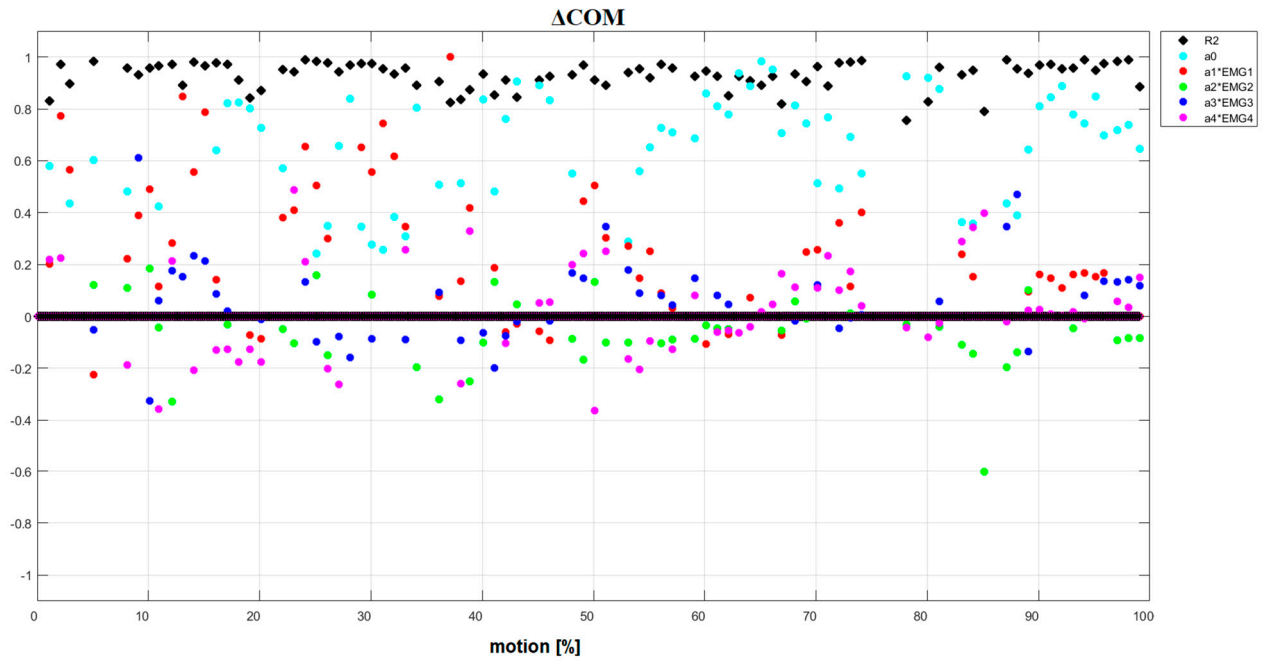

**Figure S62.** Results of linear piecewise multi-regression analysis performed in each tested fragment of the motion for DMD patient in Motion 2. Passive manipulator conditions.  $\Delta COM$ .

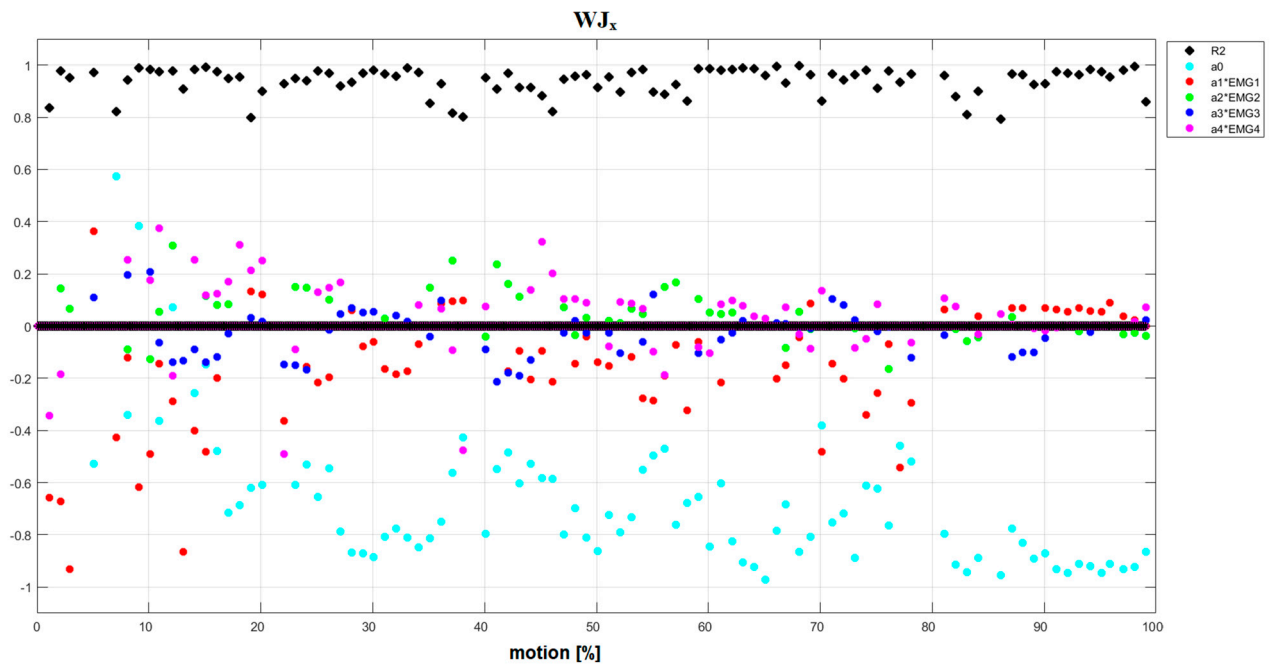

**Figure S63.** Results of linear piecewise multi-regression analysis performed in each tested fragment of the motion for DMD patient in Motion 2. Passive manipulator conditions.  $WJ_x$ .

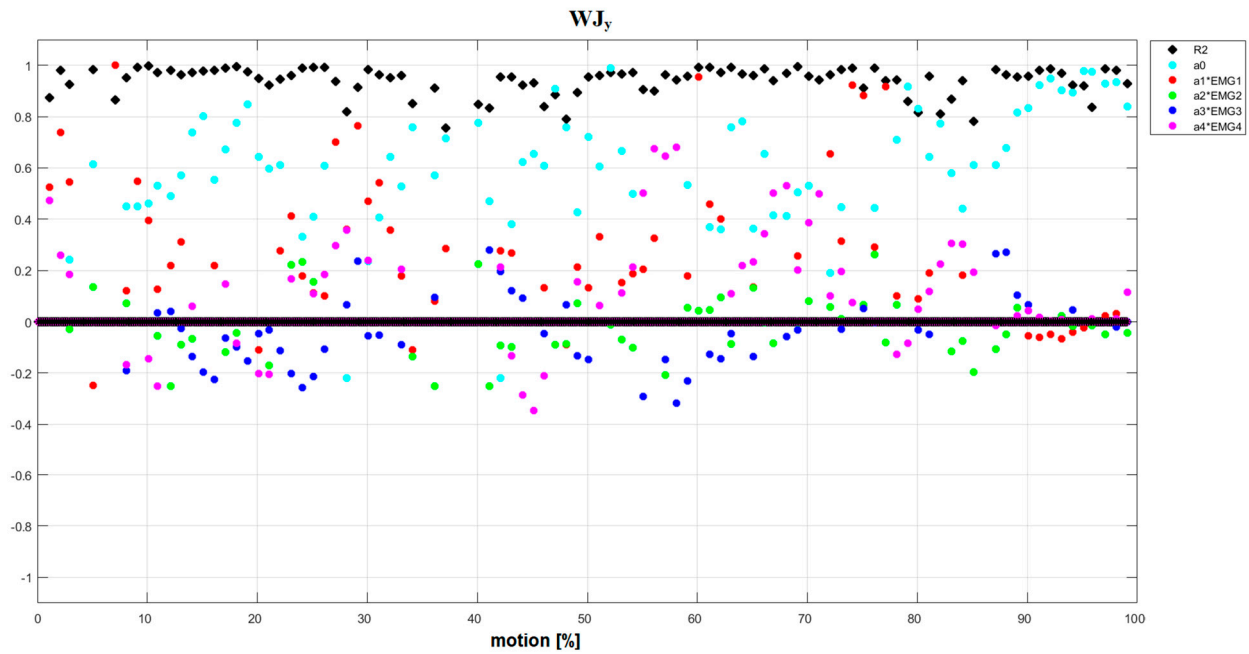

**Figure S64.** Results of linear piecewise multi-regression analysis performed in each tested fragment of the motion for DMD patient in Motion 2. Passive manipulator conditions.  $WJ_y$ .

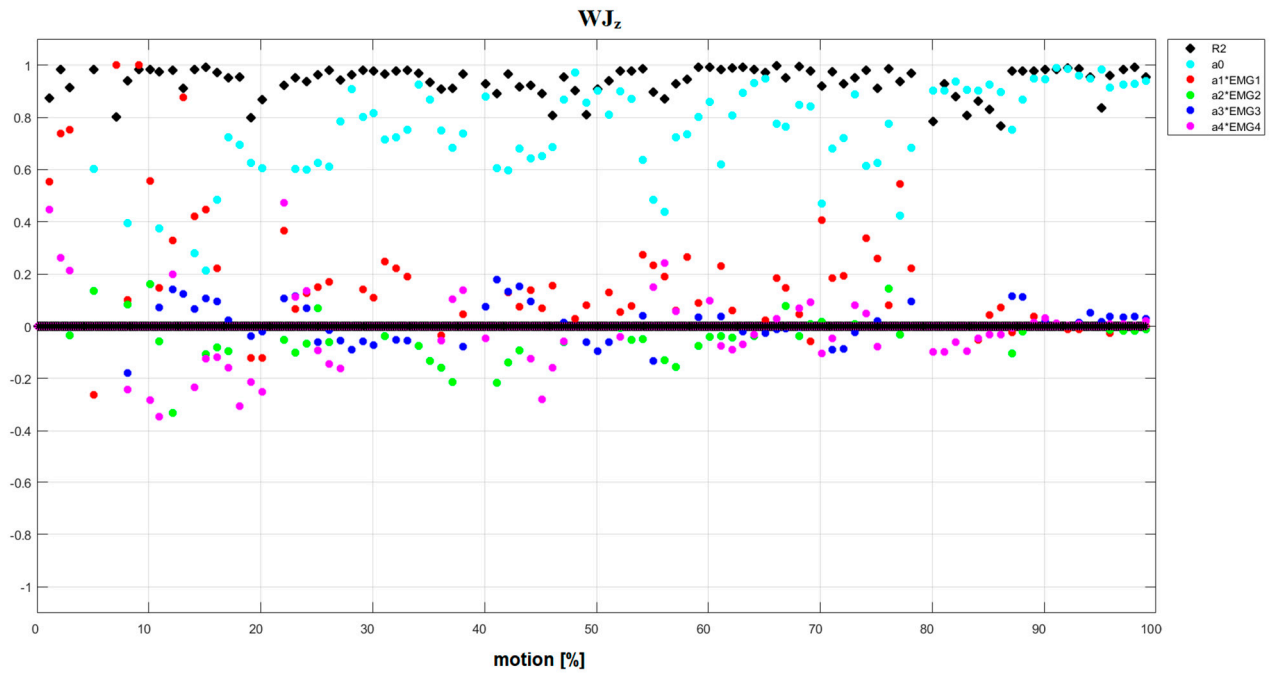

**Figure S65.** Results of linear piecewise multi-regression analysis performed in each tested fragment of the motion for DMD patient in Motion 2. Passive manipulator conditions.  $WJ_z$ .

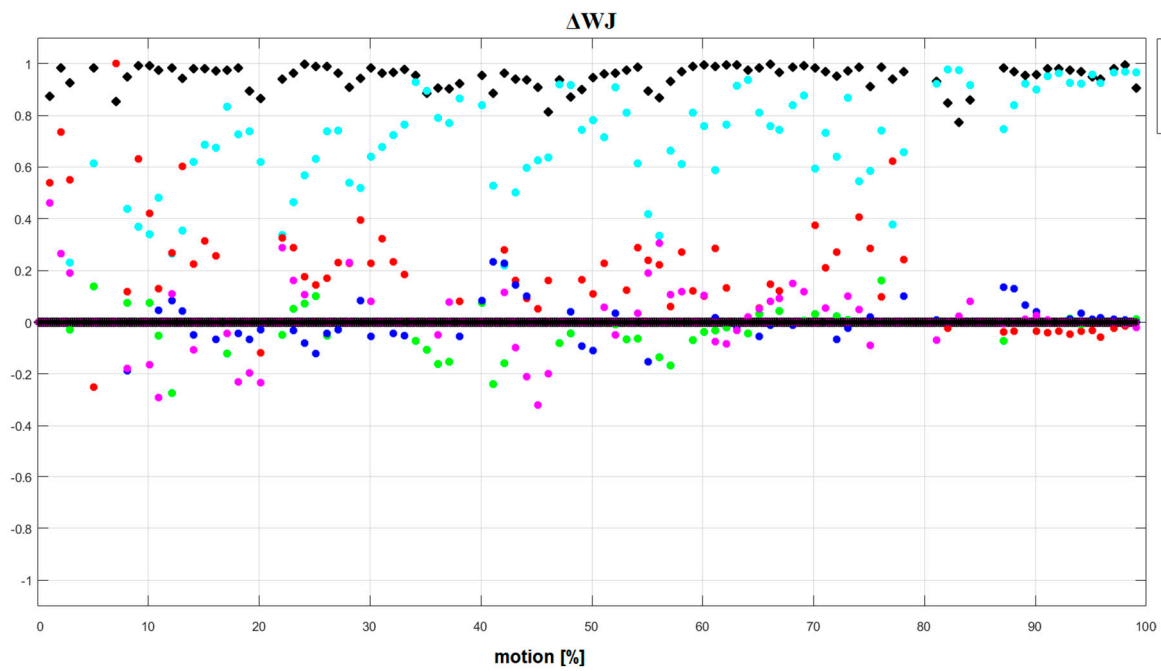

**Figure S66.** Results of linear piecewise multi-regression analysis performed in each tested fragment of the motion for DMD patient in Motion 2. Passive manipulator conditions.  $\Delta W$ .



# Supplement S4 – (Table S1 – Table S8, Figure S67-S74)

Table S1. Wilcoxon test results of kinematic data of the reference subject and DMD patient tested in natural conditions and passive manipulator conditions in both motions ( $p \leq 0.01$ ).

|                            |         | COM <sub>x</sub> | COM <sub>y</sub> | COM <sub>z</sub> | ΔCOM | WJ <sub>x</sub> | WJ <sub>y</sub> | WJ <sub>z</sub> | ΔWJ |
|----------------------------|---------|------------------|------------------|------------------|------|-----------------|-----------------|-----------------|-----|
| Reference subject Motion 1 | range 1 | +                | +                | X                | X    | +               | +               | +               | +   |
|                            | range 2 | +                | +                | X                | X    | +               | +               | +               | +   |
|                            | range 3 | +                | +                | +                | +    | +               | +               | X               | +   |
|                            | range 4 | +                | +                | +                | +    | +               | +               | +               | +   |
|                            | range 5 | +                | +                | +                | +    | +               | +               | +               | +   |
| DMD patient Motion 1       | range 1 | X                | X                | X                | X    | +               | +               | +               | +   |
|                            | range 2 | +                | +                | +                | +    | +               | +               | +               | +   |
|                            | range 3 | +                | +                | +                | X    | +               | +               | +               | +   |
|                            | range 4 | +                | +                | +                | +    | +               | X               | X               | X   |
|                            | range 5 | +                | +                | +                | +    | +               | X               | +               | +   |
| Reference subject Motion 2 | range 1 | +                | +                | +                | +    | +               | X               | +               | X   |
|                            | range 2 | +                | X                | +                | +    | +               | X               | +               | +   |
|                            | range 3 | +                | +                | +                | X    | +               | +               | +               | +   |
|                            | range 4 | +                | +                | X                | +    | +               | +               | +               | +   |
|                            | range 5 | X                | +                | X                | X    | +               | +               | +               | X   |
| DMD patient Motion 2       | range 1 | X                | +                | X                | +    | +               | +               | +               | +   |
|                            | range 2 | X                | +                | +                | +    | X               | +               | +               | +   |
|                            | range 3 | +                | X                | +                | +    | +               | +               | +               | +   |
|                            | range 4 | +                | X                | +                | +    | +               | X               | +               | X   |
|                            | range 5 | +                | X                | +                | +    | X               | +               | +               | +   |

Symbol “+” means the statistical significant difference. Symbol “X” means lack of statistical significant difference

Table S2. U Mann-Whitney test results of statistical significant differences in kinematic data between the reference subject and the DMD patient for natural conditions and passive manipulator in both motions ( $p \leq 0.01$ ).

|                                          |         | COM <sub>x</sub> | COM <sub>y</sub> | COM <sub>z</sub> | ΔCOM | WJ <sub>x</sub> | WJ <sub>y</sub> | WJ <sub>z</sub> | ΔWJ |
|------------------------------------------|---------|------------------|------------------|------------------|------|-----------------|-----------------|-----------------|-----|
| Motion 1. Natural conditions             | range 1 | +                | +                | +                | +    | +               | +               | +               | +   |
|                                          | range 2 | +                | +                | X                | +    | +               | +               | +               | +   |
|                                          | range 3 | +                | +                | X                | X    | +               | X               | +               | +   |
|                                          | range 4 | +                | +                | X                | X    | +               | X               | +               | X   |
|                                          | range 5 | +                | +                | +                | +    | +               | X               | +               | X   |
| Motion 2. Natural conditions             | range 1 | +                | +                | +                | X    | +               | X               | +               | +   |
|                                          | range 2 | +                | +                | +                | X    | +               | +               | +               | +   |
|                                          | range 3 | +                | X                | +                | +    | +               | X               | +               | +   |
|                                          | range 4 | +                | X                | +                | +    | +               | +               | +               | X   |
|                                          | range 5 | +                | +                | +                | X    | +               | +               | +               | +   |
| Motion 1. Passive manipulator conditions | range 1 | +                | +                | +                | X    | X               | X               | +               | X   |
|                                          | range 2 | +                | +                | +                | X    | +               | +               | +               | +   |
|                                          | range 3 | X                | +                | +                | +    | +               | X               | +               | X   |
|                                          | range 4 | +                | +                | +                | +    | +               | +               | +               | +   |
|                                          | range 5 | +                | +                | +                | +    | +               | +               | +               | +   |
| Motion 2. Passive manipulator conditions | range 1 | +                | +                | +                | X    | X               | +               | +               | X   |
|                                          | range 2 | X                | X                | +                | X    | X               | +               | +               | X   |
|                                          | range 3 | +                | +                | +                | +    | +               | X               | +               | +   |
|                                          | range 4 | +                | +                | +                | +    | X               | +               | +               | X   |
|                                          | range 5 | +                | +                | +                | +    | +               | +               | +               | X   |

Symbol “+” means the statistical significant difference. Symbol “X” means lack of statistical significant difference

Table S3. Wilcoxon test results of statistical significant differences in muscle activity between natural conditions and passive manipulator conditions in both motions for the reference subject and DMD patient ( $p \leq 0.01$ ).

|                               |         | <b>EMG<sub>1</sub></b> | <b>EMG<sub>2</sub></b> | <b>EMG<sub>3</sub></b> | <b>EMG<sub>4</sub></b> |
|-------------------------------|---------|------------------------|------------------------|------------------------|------------------------|
| Reference subject<br>Motion 1 | range 1 | +                      | <b>X</b>               | +                      | <b>X</b>               |
|                               | range 2 | <b>X</b>               | <b>X</b>               | <b>X</b>               | +                      |
|                               | range 3 | <b>X</b>               | +                      | +                      | <b>X</b>               |
|                               | range 4 | +                      | +                      | +                      | <b>X</b>               |
|                               | range 5 | +                      | +                      | <b>X</b>               | +                      |
| Reference subject<br>Motion 2 | range 1 | +                      | <b>X</b>               | <b>X</b>               | <b>X</b>               |
|                               | range 2 | +                      | +                      | <b>X</b>               | <b>X</b>               |
|                               | range 3 | +                      | +                      | <b>X</b>               | +                      |
|                               | range 4 | +                      | +                      | <b>X</b>               | <b>X</b>               |
|                               | range 5 | +                      | +                      | <b>X</b>               | +                      |
| DMD patient<br>Motion 1       | range 1 | +                      | <b>X</b>               | <b>X</b>               | +                      |
|                               | range 2 | +                      | +                      | +                      | <b>X</b>               |
|                               | range 3 | <b>X</b>               | +                      | <b>X</b>               | <b>X</b>               |
|                               | range 4 | <b>X</b>               | +                      | +                      | <b>X</b>               |
|                               | range 5 | +                      | +                      | +                      | +                      |
| DMD patient<br>Motion 2       | range 1 | <b>X</b>               | <b>X</b>               | <b>X</b>               | +                      |
|                               | range 2 | +                      | <b>X</b>               | +                      | +                      |
|                               | range 3 | +                      | +                      | +                      | +                      |
|                               | range 4 | +                      | <b>X</b>               | <b>X</b>               | +                      |
|                               | range 5 | +                      | <b>X</b>               | <b>X</b>               | <b>X</b>               |

Symbol “+” means the statistical significant difference. Symbol “X” means lack of statistical significant difference

Table S4. ANOVA Kruskal-Wallis test results of statistical significant differences between five sets of muscle activity for the reference subject and DMD patient tested in natural conditions and passive manipulator in both motions ( $p \leq 0.01$ ).

|                                                                        | RS<br>NC<br>motion1 | RS PMC<br>motion1 | RS<br>NC<br>motion2 | RS PMC<br>motion2 | DMD<br>NC<br>motion1 | DMD<br>PMC<br>motion1 | DMD<br>NC<br>motion2 | DMD<br>PMC<br>motion2 |
|------------------------------------------------------------------------|---------------------|-------------------|---------------------|-------------------|----------------------|-----------------------|----------------------|-----------------------|
| <b>EMG<sub>1</sub>-EMG<sub>2</sub>-EMG<sub>3</sub></b>                 |                     |                   |                     |                   |                      |                       |                      |                       |
| range 1                                                                |                     |                   | +                   |                   | +                    | +                     |                      |                       |
| range 2                                                                | +                   |                   | +                   |                   | +                    | +                     | +                    | +                     |
| range 3                                                                | +                   |                   | +                   |                   | +                    | +                     | +                    | +                     |
| range 4                                                                | +                   | +                 | +                   | +                 | +                    |                       |                      | +                     |
| range 5                                                                | +                   | +                 | +                   |                   | +                    | +                     | +                    |                       |
| <b>EMG<sub>1</sub>-EMG<sub>2</sub>-EMG<sub>4</sub></b>                 |                     |                   |                     |                   |                      |                       |                      |                       |
| range 1                                                                |                     |                   | +                   |                   |                      | +                     | +                    |                       |
| range 2                                                                | +                   |                   | +                   | +                 |                      | +                     | +                    | +                     |
| range 3                                                                | +                   |                   | +                   | +                 | +                    |                       | +                    | +                     |
| range 4                                                                | +                   |                   | +                   | +                 | +                    |                       | +                    | +                     |
| range 5                                                                | +                   |                   | +                   | +                 | +                    | +                     | +                    |                       |
| <b>EMG<sub>2</sub>-EMG<sub>3</sub>-EMG<sub>4</sub></b>                 |                     |                   |                     |                   |                      |                       |                      |                       |
| range 1                                                                |                     |                   |                     |                   |                      | +                     | +                    |                       |
| range 2                                                                | +                   |                   | +                   |                   | +                    | +                     | +                    | +                     |
| range 3                                                                | +                   |                   | +                   | +                 | +                    | +                     |                      | +                     |
| range 4                                                                | +                   | +                 | +                   | +                 | +                    |                       | +                    |                       |
| range 5                                                                | +                   | +                 | +                   | +                 | +                    | +                     |                      |                       |
| <b>EMG<sub>1</sub>-EMG<sub>3</sub>-EMG<sub>4</sub></b>                 |                     |                   |                     |                   |                      |                       |                      |                       |
| range 1                                                                |                     |                   | +                   |                   | +                    | +                     |                      |                       |
| range 2                                                                | +                   |                   | +                   | +                 | +                    | +                     | +                    | +                     |
| range 3                                                                | +                   |                   | +                   | +                 | +                    | +                     | +                    |                       |
| range 4                                                                | +                   | +                 | +                   |                   |                      |                       | +                    |                       |
| range 5                                                                | +                   | +                 | +                   | +                 | +                    | +                     | +                    |                       |
| <b>EMG<sub>1</sub>-EMG<sub>2</sub>-EMG<sub>3</sub>-EMG<sub>4</sub></b> |                     |                   |                     |                   |                      |                       |                      |                       |
| range 1                                                                |                     |                   | +                   |                   | +                    | +                     | +                    |                       |
| range 2                                                                | +                   |                   | +                   | +                 | +                    | +                     | +                    | +                     |
| range 3                                                                | +                   |                   | +                   | +                 | +                    | +                     | +                    | +                     |
| range 4                                                                | +                   | +                 | +                   | +                 | +                    |                       | +                    | +                     |
| range 5                                                                | +                   | +                 | +                   | +                 | +                    | +                     | +                    |                       |

Symbol “+” means the statistical significant difference

Table S5 – S12 and Figure S67 - S74. Results of linear piecewise multi-regression analysis presenting accumulated synergistic and antagonistic participations calculated between kinematic data and muscular activity for the reference subject and DMD patient in natural conditions and passive manipulator conditions in both motions ( $p \leq 0.05$ ,  $R^2 \geq 0.75$ ): the  $a_1 \cdot EMG_1$  part describes RT TRAPEZIUS muscle participation, the  $a_2 \cdot EMG_2$  part describes RT LAT. TRICEPS muscle participation, the  $a_3 \cdot EMG_3$  part describes RT ANT.DELTOID muscle participation, the  $a_4 \cdot EMG_4$  part describes RT BICEPS BR muscle participation.

Table S5. Reference subject. Motion 1. Natural conditions.

|                  | $a_1 \cdot EMG_1$<br>Synerg. | $a_1 \cdot EMG_1$<br>Antagon. | $a_2 \cdot EMG_2$<br>Synerg. | $a_2 \cdot EMG_2$<br>Antagon. | $a_3 \cdot EMG_3$<br>Synerg. | $a_3 \cdot EMG_3$<br>Antagon. | $a_4 \cdot EMG_4$<br>Synerg. | $a_4 \cdot EMG_4$<br>Antagon. |
|------------------|------------------------------|-------------------------------|------------------------------|-------------------------------|------------------------------|-------------------------------|------------------------------|-------------------------------|
| COM <sub>x</sub> | <b>3,56</b>                  | <b>-3,56</b>                  | 1,37                         | -1,42                         | 2,55                         | -0,72                         | 1,25                         | -2,94                         |
| COM <sub>y</sub> | <b>13,48</b>                 | <b>-6,91</b>                  | 2,40                         | -3,84                         | 2,32                         | <b>-6,66</b>                  | 4,92                         | -2,96                         |
| COM <sub>z</sub> | <b>4,05</b>                  | <b>-3,80</b>                  | 2,67                         | -1,66                         | 1,81                         | -1,93                         | 1,72                         | -3,26                         |
| ΔCOM             | <b>4,79</b>                  | <b>-3,14</b>                  | 1,68                         | -2,34                         | 2,21                         | -1,45                         | 1,71                         | -2,50                         |
| WJ <sub>x</sub>  | <b>3,41</b>                  | <b>-3,12</b>                  | 1,08                         | -1,37                         | 2,52                         | -0,48                         | 1,02                         | -2,47                         |
| WJ <sub>y</sub>  | <b>10,42</b>                 | <b>-12,49</b>                 | 3,32                         | -5,68                         | 2,42                         | -9,39                         | 3,08                         | <b>-12,31</b>                 |
| WJ <sub>z</sub>  | <b>4,81</b>                  | -3,73                         | <b>4,92</b>                  | -2,88                         | 1,98                         | -2,93                         | 2,36                         | <b>-13,38</b>                 |
| ΔW               | <b>4,56</b>                  | -1,92                         | 1,83                         | <b>-2,36</b>                  | 1,11                         | <b>-2,29</b>                  | <b>4,97</b>                  | -1,60                         |

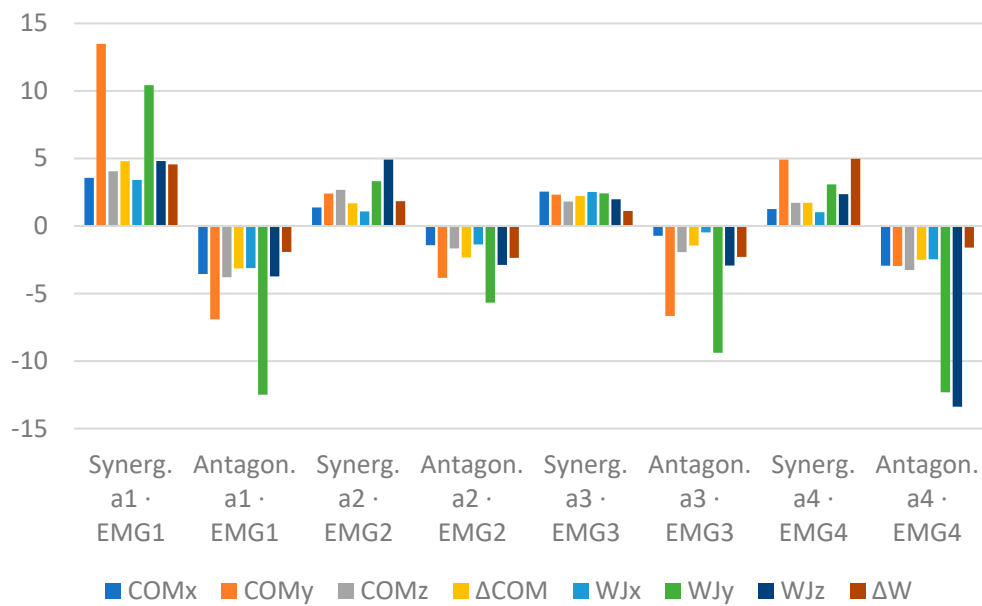

Figure S67 Reference subject. Motion 1. Natural conditions.

**Table S6.** Reference subject. Motion 1. Passive manipulator conditions.

|                  | $a_1 \cdot EMG_1$<br>Synerg. | $a_1 \cdot EMG_1$<br>Antagon. | $a_2 \cdot EMG_2$<br>Synerg. | $a_2 \cdot EMG_2$<br>Antagon. | $a_3 \cdot EMG_3$<br>Synerg. | $a_3 \cdot EMG_3$<br>Antagon. | $a_4 \cdot EMG_4$<br>Synerg. | $a_4 \cdot EMG_4$<br>Antagon. |
|------------------|------------------------------|-------------------------------|------------------------------|-------------------------------|------------------------------|-------------------------------|------------------------------|-------------------------------|
| COM <sub>x</sub> | 2,26                         | -3,17                         | 1,52                         | <b>-7,47</b>                  | 1,63                         | <b>-5,94</b>                  | <b>2,55</b>                  | <b>-6,30</b>                  |
| COM <sub>y</sub> | 2,89                         | -0,35                         | 0,22                         | <b>-7,16</b>                  | <b>5,29</b>                  | -1,20                         | 2,21                         | -1,38                         |
| COM <sub>z</sub> | 1,64                         | -3,38                         | <b>5,27</b>                  | -4,20                         | 1,57                         | <b>-9,15</b>                  | 2,86                         | -2,53                         |
| ΔCOM             | 2,93                         | -0,47                         | 0,64                         | <b>-6,08</b>                  | <b>6,04</b>                  | -1,15                         | 1,55                         | -1,75                         |
| WJ <sub>x</sub>  | 2,08                         | -0,54                         | 0,43                         | <b>-8,50</b>                  | 1,38                         | -1,04                         | <b>4,30</b>                  | -0,76                         |
| WJ <sub>y</sub>  | 0,62                         | <b>-2,17</b>                  | <b>3,63</b>                  | -1,13                         | 2,21                         | <b>-3,14</b>                  | <b>3,84</b>                  | <b>-2,45</b>                  |
| WJ <sub>z</sub>  | 1,37                         | -3,03                         | 3,32                         | -3,33                         | <b>5,52</b>                  | <b>-4,78</b>                  | 1,41                         | -3,54                         |
| ΔW               | 0,90                         | -1,30                         | <b>2,81</b>                  | -1,36                         | <b>2,25</b>                  | <b>-2,76</b>                  | <b>2,17</b>                  | <b>-2,30</b>                  |

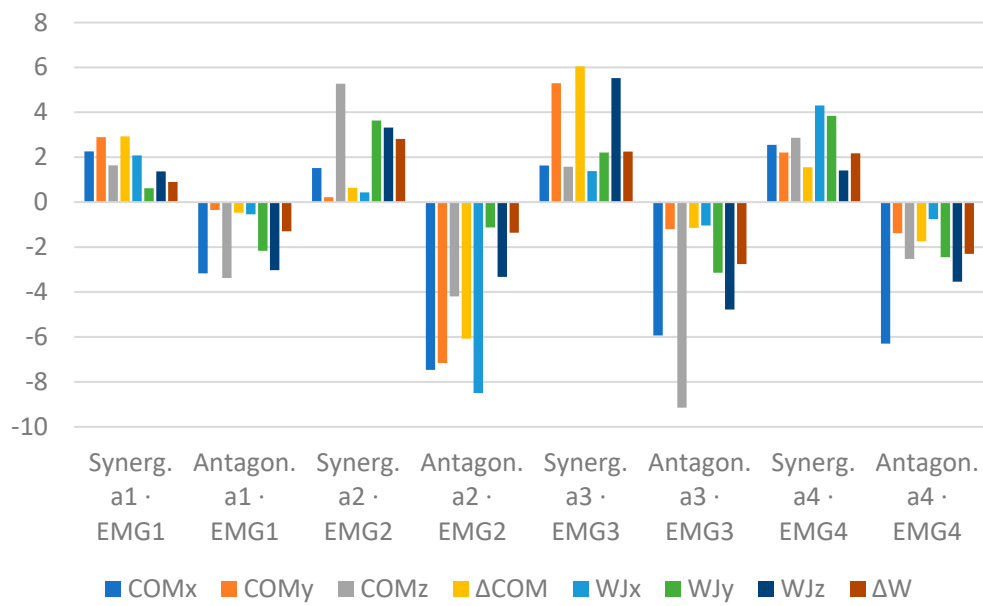

**Figure S68.** Reference subject. Motion 1. Passive manipulator conditions.

**Table S7.** Reference subject. Motion 2. Natural conditions.

|                  | $a_1 \cdot EMG_1$<br>Synerg. | $a_1 \cdot EMG_1$<br>Antagon. | $a_2 \cdot EMG_2$<br>Synerg. | $a_2 \cdot EMG_2$<br>Antagon. | $a_3 \cdot EMG_3$<br>Synerg. | $a_3 \cdot EMG_3$<br>Antagon. | $a_4 \cdot EMG_4$<br>Synerg. | $a_4 \cdot EMG_4$<br>Antagon. |
|------------------|------------------------------|-------------------------------|------------------------------|-------------------------------|------------------------------|-------------------------------|------------------------------|-------------------------------|
| COM <sub>x</sub> | 1,36                         | -1,11                         | <b>2,80</b>                  | -1,05                         | 1,56                         | -2,08                         | 1,04                         | <b>-5,62</b>                  |
| COM <sub>y</sub> | 2,67                         | -4,63                         | 5,83                         | -3,61                         | <b>12,94</b>                 | -2,89                         | 4,05                         | <b>-10,47</b>                 |
| COM <sub>z</sub> | 0,66                         | -0,36                         | 0,89                         | -0,34                         | <b>1,52</b>                  | <b>-1,92</b>                  | 0,92                         | <b>-1,59</b>                  |
| ΔCOM             | 1,07                         | -0,63                         | 2,24                         | -0,48                         | <b>2,76</b>                  | <b>-1,91</b>                  | 2,09                         | <b>-1,78</b>                  |
| WJ <sub>x</sub>  | 1,29                         | -1,14                         | <b>1,83</b>                  | -0,46                         | 0,93                         | <b>-4,30</b>                  | 0,73                         | <b>-5,47</b>                  |
| WJ <sub>y</sub>  | 3,83                         | -4,26                         | 4,87                         | -5,86                         | <b>13,81</b>                 | -4,07                         | 8,73                         | <b>-10,16</b>                 |
| WJ <sub>z</sub>  | 3,15                         | -1,39                         | 2,48                         | -3,15                         | 4,99                         | <b>-8,71</b>                  | <b>11,49</b>                 | -1,20                         |
| ΔW               | 1,74                         | -1,15                         | 2,08                         | -1,56                         | <b>4,54</b>                  | <b>-3,96</b>                  | 3,49                         | -3,29                         |

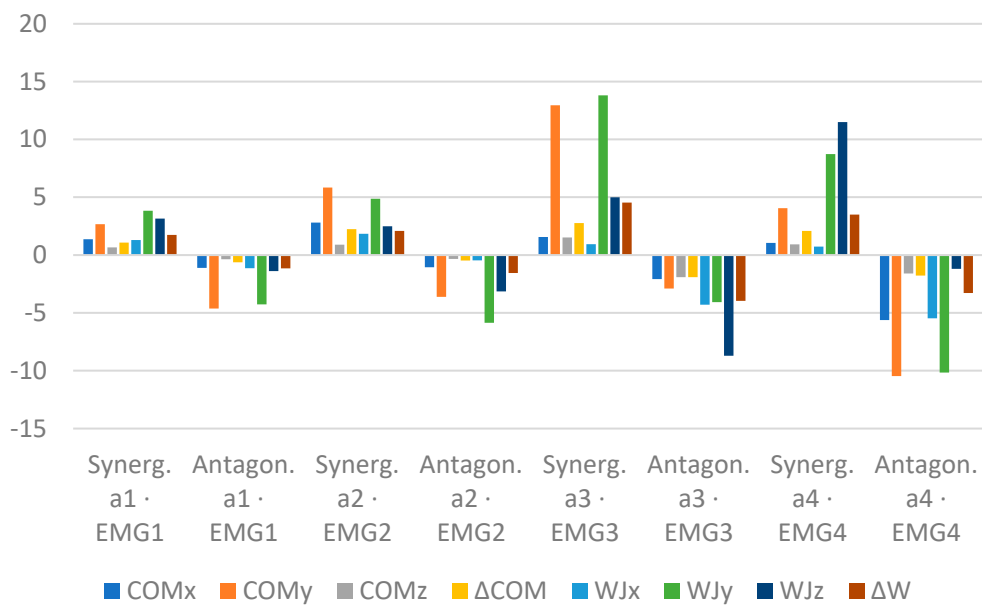

**Figure S69.** Reference subject. Motion 2. Natural conditions.

**Table S8.** Reference subject. Motion 2. Passive manipulator conditions.

|                  | $a_1 \cdot EMG_1$<br>Synerg. | $a_1 \cdot EMG_1$<br>Antagon. | $a_2 \cdot EMG_2$<br>Synerg. | $a_2 \cdot EMG_2$<br>Antagon. | $a_3 \cdot EMG_3$<br>Synerg. | $a_3 \cdot EMG_3$<br>Antagon. | $a_4 \cdot EMG_4$<br>Synerg. | $a_4 \cdot EMG_4$<br>Antagon. |
|------------------|------------------------------|-------------------------------|------------------------------|-------------------------------|------------------------------|-------------------------------|------------------------------|-------------------------------|
| COM <sub>x</sub> | 1,08                         | -0,69                         | <b>5,32</b>                  | -0,53                         | 0,49                         | -1,18                         | 0,66                         | <b>-2,55</b>                  |
| COM <sub>y</sub> | 1,41                         | -1,87                         | 2,52                         | <b>-6,39</b>                  | 3,90                         | -3,73                         | <b>5,89</b>                  | -2,01                         |
| COM <sub>z</sub> | 1,05                         | -1,11                         | <b>8,72</b>                  | -1,04                         | 0,67                         | -1,92                         | 1,06                         | <b>-3,54</b>                  |
| ΔCOM             | 0,85                         | -1,42                         | 0,76                         | <b>-6,43</b>                  | 2,77                         | -1,62                         | <b>3,49</b>                  | -1,24                         |
| WJ <sub>x</sub>  | 1,36                         | -1,91                         | <b>6,39</b>                  | -0,64                         | 0,92                         | -1,09                         | 1,49                         | <b>-2,26</b>                  |
| WJ <sub>y</sub>  | 2,72                         | -2,81                         | 1,43                         | <b>-27,09</b>                 | 5,43                         | -2,49                         | <b>8,99</b>                  | -3,67                         |
| WJ <sub>z</sub>  | 1,04                         | -1,68                         | <b>5,63</b>                  | -2,53                         | 1,56                         | -2,63                         | 2,28                         | <b>-4,29</b>                  |
| ΔW               | 1,22                         | -0,95                         | 1,21                         | <b>-6,54</b>                  | 1,94                         | -1,29                         | <b>3,34</b>                  | -1,97                         |

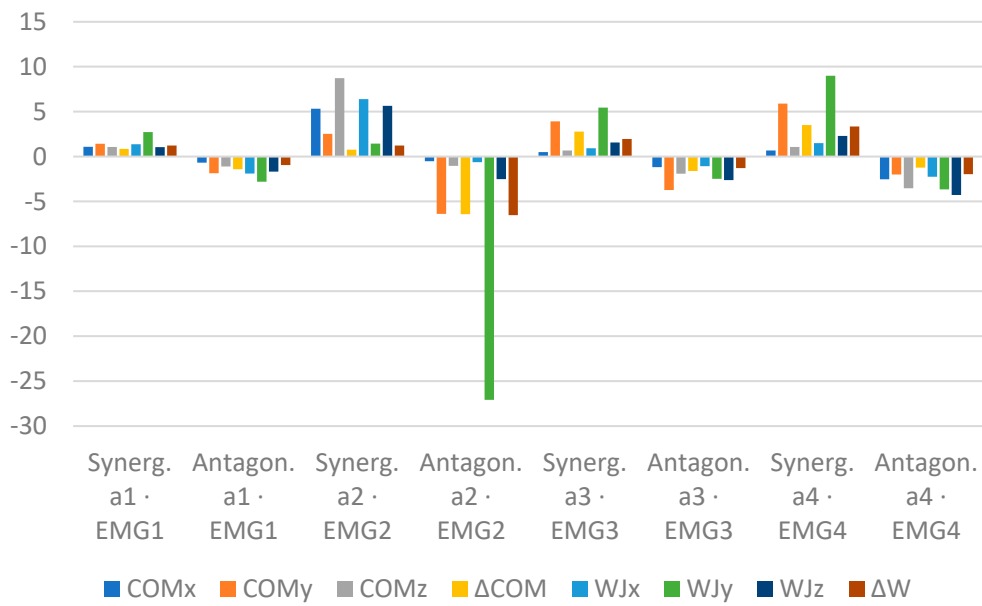

**Figure S70.** Reference subject. Motion 2. Passive manipulator conditions.

**Table S9.** DMD patient. Motion 1. Natural conditions.

|                  | $a_1 \cdot EMG_1$<br>Synerg. | $a_1 \cdot EMG_1$<br>Antagon. | $a_2 \cdot EMG_2$<br>Synerg. | $a_2 \cdot EMG_2$<br>Antagon. | $a_3 \cdot EMG_3$<br>Synerg. | $a_3 \cdot EMG_3$<br>Antagon. | $a_4 \cdot EMG_4$<br>Synerg. | $a_4 \cdot EMG_4$<br>Antagon. |
|------------------|------------------------------|-------------------------------|------------------------------|-------------------------------|------------------------------|-------------------------------|------------------------------|-------------------------------|
| COM <sub>x</sub> | 8,31                         | -3,67                         | 10,55                        | -2,58                         | 14,88                        | <b>-6,39</b>                  | <b>19,40</b>                 | -2,09                         |
| COM <sub>y</sub> | <b>13,49</b>                 | -3,95                         | 3,65                         | -6,71                         | 5,28                         | <b>-17,74</b>                 | 4,38                         | -7,77                         |
| COM <sub>z</sub> | 2,26                         | -8,87                         | 1,61                         | -10,44                        | <b>4,34</b>                  | <b>-27,56</b>                 | 3,33                         | -13,77                        |
| ΔCOM             | 6,80                         | -2,34                         | 7,50                         | -1,87                         | <b>22,15</b>                 | <b>-3,86</b>                  | 14,90                        | -2,00                         |
| WJ <sub>x</sub>  | <b>2,98</b>                  | -5,13                         | 1,31                         | -7,51                         | <b>3,11</b>                  | <b>-20,42</b>                 | 1,13                         | -15,01                        |
| WJ <sub>y</sub>  | 4,98                         | -3,93                         | 8,01                         | -3,27                         | 9,16                         | <b>-11,17</b>                 | <b>19,30</b>                 | -2,90                         |
| WJ <sub>z</sub>  | 5,82                         | <b>-3,48</b>                  | 8,06                         | -1,34                         | <b>19,56</b>                 | <b>-3,89</b>                  | 16,16                        | -1,33                         |
| ΔW               | 5,61                         | -3,19                         | 7,38                         | -1,19                         | <b>15,94</b>                 | <b>-4,01</b>                  | <b>14,97</b>                 | -1,23                         |

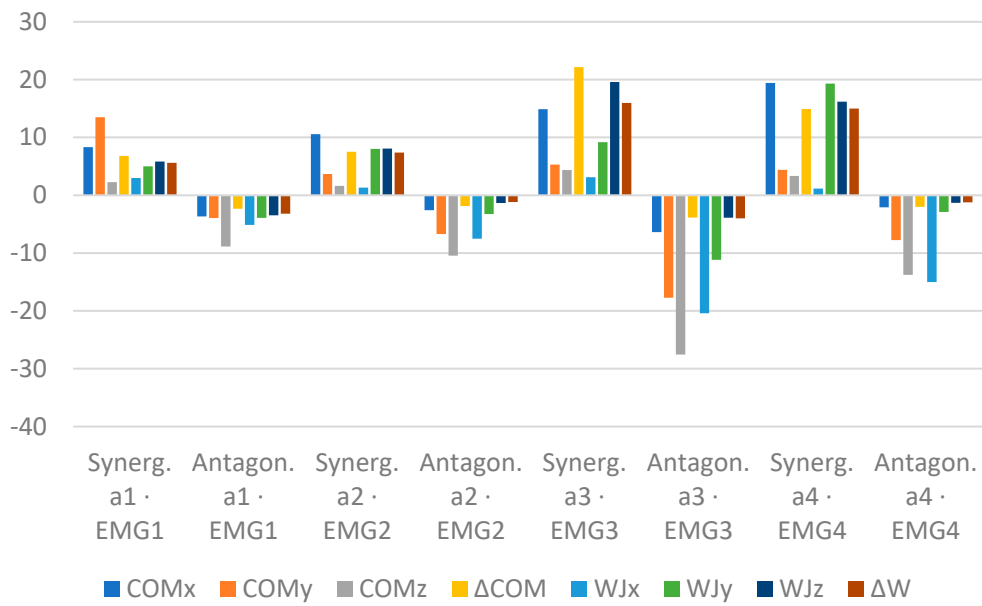

**Figure S71.** DMD patient. Motion 1. Natural conditions.



**Table S10.** DMD patient. Motion 1. Passive manipulator conditions.

|                  | $a_1 \cdot EMG_1$<br>Synerg. | $a_1 \cdot EMG_1$<br>Antagon. | $a_2 \cdot EMG_2$<br>Synerg. | $a_2 \cdot EMG_2$<br>Antagon. | $a_3 \cdot EMG_3$<br>Synerg. | $a_3 \cdot EMG_3$<br>Antagon. | $a_4 \cdot EMG_4$<br>Synerg. | $a_4 \cdot EMG_4$<br>Antagon. |
|------------------|------------------------------|-------------------------------|------------------------------|-------------------------------|------------------------------|-------------------------------|------------------------------|-------------------------------|
| COM <sub>x</sub> | 0,73                         | <b>-11,79</b>                 | 1,62                         | <b>-11,31</b>                 | <b>11,72</b>                 | -4,24                         | <b>12,04</b>                 | -7,13                         |
| COM <sub>y</sub> | 13,14                        | -0,37                         | <b>16,48</b>                 | -2,75                         | 1,97                         | <b>-18,61</b>                 | 12,18                        | -2,90                         |
| COM <sub>z</sub> | <b>9,87</b>                  | -6,23                         | 5,36                         | -9,01                         | 6,74                         | -5,87                         | 4,47                         | <b>-14,34</b>                 |
| ΔCOM             | <b>10,30</b>                 | -2,33                         | 6,28                         | -3,60                         | 2,63                         | <b>-8,51</b>                  | <b>10,10</b>                 | -2,78                         |
| WJ <sub>x</sub>  | 1,20                         | -4,61                         | <b>2,91</b>                  | -3,31                         | 1,85                         | -3,67                         | 2,24                         | <b>-6,67</b>                  |
| WJ <sub>y</sub>  | 6,75                         | -3,10                         | 1,80                         | <b>-8,82</b>                  | 7,20                         | -4,05                         | <b>13,92</b>                 | -0,89                         |
| WJ <sub>z</sub>  | 7,93                         | -0,73                         | 2,69                         | <b>-4,88</b>                  | 7,19                         | -1,51                         | <b>8,75</b>                  | -1,76                         |
| ΔW               | 5,88                         | -0,79                         | 1,93                         | <b>-4,04</b>                  | 4,72                         | -0,85                         | <b>8,81</b>                  | -1,35                         |

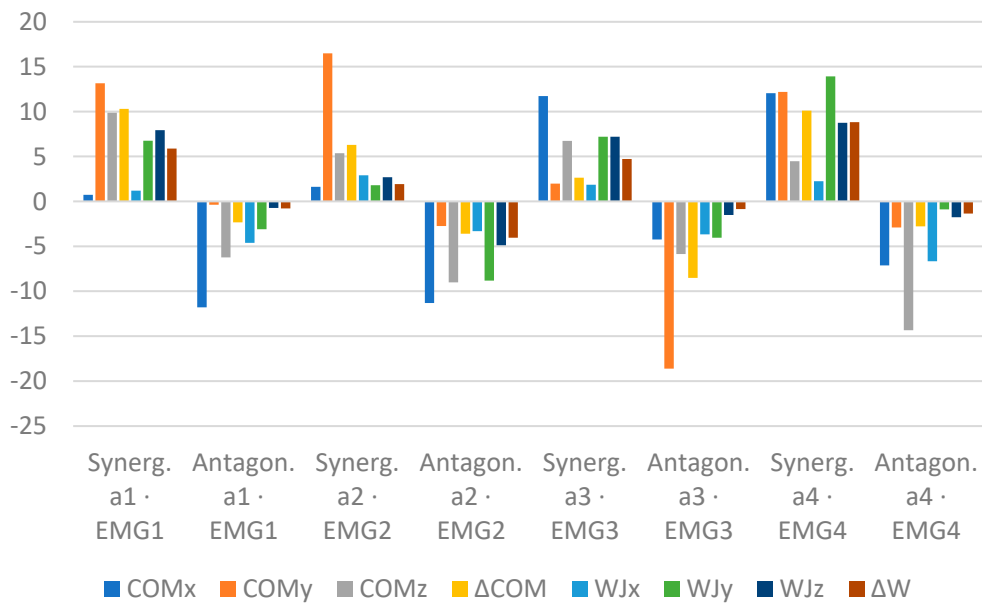

**Figure S72.** DMD patient. Motion 1. Passive manipulator conditions.

Table S11 DMD patient. Motion 2. Natural conditions.

|                  | $a_1 \cdot EMG_1$<br>Synerg. | $a_1 \cdot EMG_1$<br>Antagon. | $a_2 \cdot EMG_2$<br>Synerg. | $a_2 \cdot EMG_2$<br>Antagon. | $a_3 \cdot EMG_3$<br>Synerg. | $a_3 \cdot EMG_3$<br>Antagon. | $a_4 \cdot EMG_4$<br>Synerg. | $a_4 \cdot EMG_4$<br>Antagon. |
|------------------|------------------------------|-------------------------------|------------------------------|-------------------------------|------------------------------|-------------------------------|------------------------------|-------------------------------|
| COM <sub>x</sub> | 3,53                         | -3,41                         | 5,01                         | -3,08                         | <b>7,04</b>                  | -4,90                         | 4,31                         | <b>-6,13</b>                  |
| COM <sub>y</sub> | 6,10                         | <b>-7,62</b>                  | 10,42                        | -5,99                         | 4,76                         | -5,70                         | <b>16,41</b>                 | <b>-6,97</b>                  |
| COM <sub>z</sub> | 3,60                         | -4,99                         | 1,76                         | <b>-10,04</b>                 | 3,31                         | -2,54                         | <b>5,47</b>                  | <b>-9,01</b>                  |
| ΔCOM             | 2,88                         | -2,62                         | 2,22                         | <b>-3,41</b>                  | 2,69                         | -0,68                         | <b>7,99</b>                  | -2,20                         |
| WJ <sub>x</sub>  | 4,52                         | -4,13                         | 1,53                         | <b>-9,01</b>                  | 2,95                         | -2,17                         | <b>6,83</b>                  | -6,95                         |
| WJ <sub>y</sub>  | 4,45                         | -4,99                         | <b>8,07</b>                  | -1,80                         | 3,70                         | -3,36                         | 4,22                         | <b>-7,62</b>                  |
| WJ <sub>z</sub>  | 4,44                         | -4,57                         | <b>8,86</b>                  | -0,98                         | 2,18                         | -2,35                         | 4,95                         | <b>-9,56</b>                  |
| ΔW               | 3,62                         | -2,72                         | <b>6,97</b>                  | -1,62                         | 1,30                         | -0,84                         | 5,48                         | <b>-3,75</b>                  |

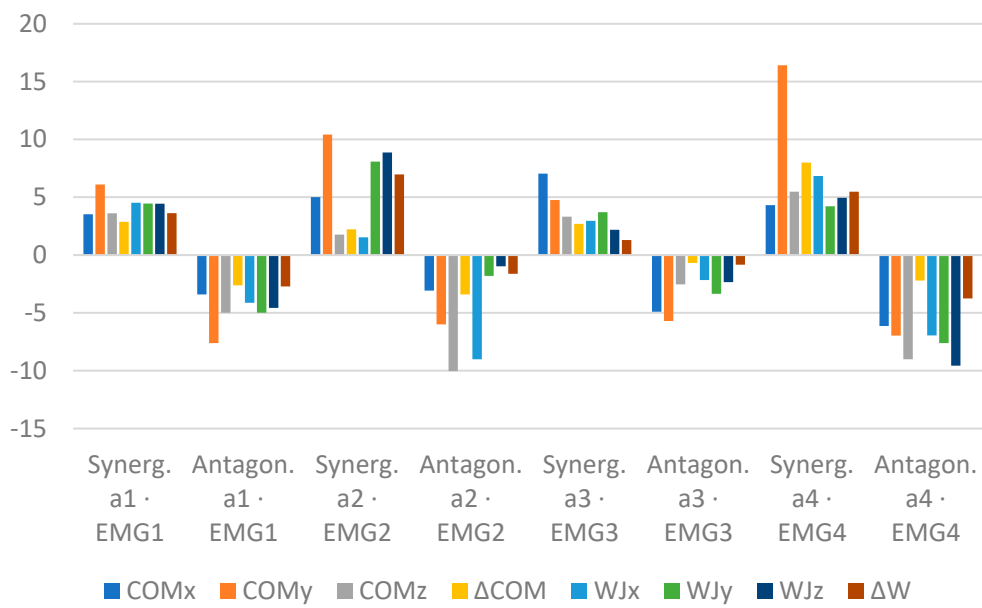

Figure S73. DMD patient. Motion 2. Natural conditions.

**Table S12.** DMD patient. Motion 2. Passive manipulator conditions.

|                  | $a_1 \cdot EMG_1$<br>Synerg. | $a_1 \cdot EMG_1$<br>Antagon. | $a_2 \cdot EMG_2$<br>Synerg. | $a_2 \cdot EMG_2$<br>Antagon. | $a_3 \cdot EMG_3$<br>Synerg. | $a_3 \cdot EMG_3$<br>Antagon. | $a_4 \cdot EMG_4$<br>Synerg. | $a_4 \cdot EMG_4$<br>Antagon. |
|------------------|------------------------------|-------------------------------|------------------------------|-------------------------------|------------------------------|-------------------------------|------------------------------|-------------------------------|
| COM <sub>x</sub> | 11,35                        | <b>-12,62</b>                 | 3,44                         | -3,50                         | 1,28                         | -8,63                         | <b>12,83</b>                 | -4,23                         |
| COM <sub>y</sub> | <b>23,05</b>                 | -4,38                         | 3,12                         | -2,73                         | 6,75                         | -1,89                         | 8,29                         | <b>-6,53</b>                  |
| COM <sub>z</sub> | <b>14,61</b>                 | -3,99                         | 0,64                         | -4,92                         | 5,70                         | -2,61                         | 4,46                         | <b>-8,16</b>                  |
| ΔCOM             | <b>17,40</b>                 | -0,87                         | 1,14                         | <b>-4,07</b>                  | 4,71                         | -1,57                         | 5,17                         | <b>-3,67</b>                  |
| WJ <sub>x</sub>  | 1,80                         | <b>-13,48</b>                 | 3,14                         | -0,81                         | 1,36                         | -3,03                         | <b>5,06</b>                  | -2,79                         |
| WJ <sub>y</sub>  | <b>19,28</b>                 | -0,85                         | 2,11                         | -3,14                         | 2,03                         | <b>-4,24</b>                  | 10,77                        | -2,25                         |
| WJ <sub>z</sub>  | <b>14,11</b>                 | -0,75                         | 0,74                         | -3,00                         | 2,27                         | -1,40                         | <b>3,06</b>                  | -4,39                         |
| ΔW               | <b>14,73</b>                 | -0,78                         | 0,94                         | <b>-2,44</b>                  | 1,73                         | -1,50                         | 3,88                         | <b>-2,75</b>                  |

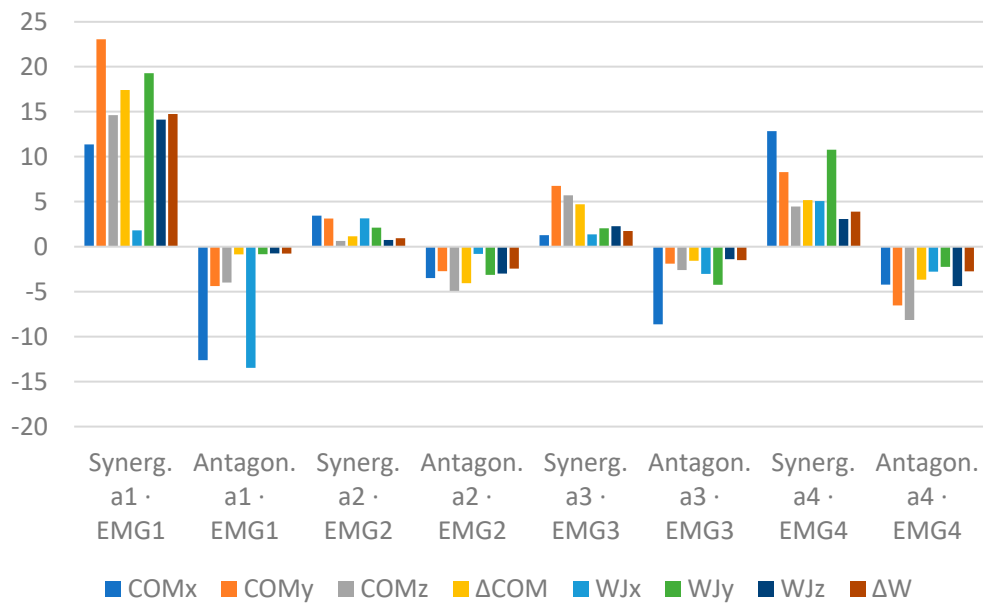

**Figure S74.** DMD patient. Motion 2. Passive manipulator conditions.
